# Supplementary material
Source: publisher figshare collection journal article supplement (https://gsapubs.figshare.com/articles/dataset/_/23596323)
Supplement: Supplementary file 1 [file 1]

## Sheet: PlotDat9
Source sheet	Table-S1a-SIMS	0.2	209.717	1	208.829	4.91998	0.85	203.909
Plot name	Average9	7.8	209.717	2	207.692	4.89537	1.15	203.909
Plot Type	15			3	208.349	4.93118	1.15	213.749
1st free col	8			4	212.28	5.04682	0.85	213.749
Sigma Level	1			5	211.167	5.22859	0.85	203.909
Absolute Errs	TRUE			6	210.284	5.07839	ErrBox	ErrBox
Symbol Type	1			7	209.765	5.21157	1.85	202.796
Inverse Plot	FALSE			IsoLine	IsoLine	IsoLine	2.15	202.796
Color Plot	TRUE						2.15	212.587
3D plot	FALSE						1.85	212.587
Linear	FALSE						1.85	202.796
Data Range	P33:Q41						ErrBox	ErrBox
Filled Symbols	TRUE						2.85	203.417
ConcAge	FALSE						3.15	203.417
ConcSwap	FALSE						3.15	213.28
1st Symbol-row	1						2.85	213.28
							2.85	203.417
							ErrBox	ErrBox
							3.85	207.233
							4.15	207.233
							4.15	217.327
							3.85	217.327
							3.85	207.233
							ErrBox	ErrBox
							4.85	205.939
							5.15	205.939
							5.15	216.396
							4.85	216.396
							4.85	205.939
							ErrBox	ErrBox
							5.85	205.205
							6.15	205.205
							6.15	215.362
							5.85	215.362
							5.85	205.205
							ErrBox	ErrBox
							6.85	204.553
							7.15	204.553
							7.15	214.977
							6.85	214.977
							6.85	204.553
							ErrBox	ErrBox

## Sheet: Table S1
Table S1 Representative samples by this study from the western Kunlun
Sample ID	Location	Rock type
14QW130	Bailongshan	Granodiorite
14QW131	Bailongshan	Granodiorite
14QW133	Bailongshan	Granodiorite
14QW136	Bailongshan	Granodiorite
14QW138	Bailongshan	Granodiorite
14QW143	Bailongshan	Two-mica granite
14QW145-1	Bailongshan	Two-mica granite
14QW145-2	Bailongshan	Two-mica granite
BLS10	Bailongshan	Two-mica granite
BLS41	Bailongshan	Spodumene-absent pegmatite
BLS1746	Bailongshan	Spodumene-absent pegmatite
BLS1749	Bailongshan	Spodumene-absent pegmatite
BLS1724	Bailongshan	Spodumene-bearing pegmatite
18KL82-1 - 10	Kangxiwa	Schist
18KL79-3	Kangxiwa	Gneiss
18KL80-1	Kangxiwa	Gneiss
18KL08-3-10	Taxkorgan	Pelitic granulite
18KL08-3-12	Taxkorgan	Pelitic granulite
18KL09-4-1	Taxkorgan	Pelitic granulite
18KL09-4-2	Taxkorgan	Pelitic granulite
18KL09-5-2	Taxkorgan	Pelitic granulite

## Sheet: Table-S2A-SIMS
Table S2A SIMS U-Pb zircon data
							Radiogenic isotopic ratio						Isotopic age (Ma)
Sample/	[U]	[Th]	Th/U	f206	207Pb	±s	207Pb	±s	206Pb	±s	207Pb	±s	207Pb	±s	206Pb	±s	Comment
spot #	ppm	ppm		%	206Pb	%	235U	%	238U	%	206Pb		235U		238U
14QW136 I-type granite
14QW136@01	278.942	146.025	0.523495	0.11	0.0499829	1.81595	0.242007	2.36589	0.0351161	1.51651	194.196	41.6781	220.063	4.69172	222.489	3.31735
14QW136@02	341.929	138.941	0.406344	0.09	0.0506913	0.99994	0.237529	1.89696	0.0339845	1.61201	226.817	22.9454	216.395	3.70374	215.438	3.41639
14QW136@03	249.933	105.361	0.421557	0.01	0.0509457	1.16193	0.238256	1.91407	0.0339184	1.52104	238.375	26.5767	216.992	3.74647	215.026	3.21749
14QW136@04	270.849	125.934	0.464961	0.07	0.0507655	1.10626	0.239514	1.86443	0.0342186	1.50076	230.196	25.3507	218.023	3.66471	216.897	3.20175
14QW136@05	255.72	125.114	0.48926	0.16	0.0513248	1.14918	0.239695	1.90344	0.0338712	1.51738	255.446	26.2068	218.171	3.7438	214.731	3.20542
14QW136@06	314.801	146.131	0.464202	0.11	0.0506744	1.03682	0.239314	1.82347	0.0342514	1.50002	226.047	23.7887	217.859	3.58164	217.102	3.20313
14QW136@08	390.946	159.617	0.408284	0.08	0.0504091	1.38763	0.236243	2.07257	0.0339898	1.53948	213.899	31.8295	215.339	4.02953	215.471	3.26314
14QW136@09	435.38	271.231	0.622975	0.03	0.0505583	1.0491	0.241282	1.83097	0.0346123	1.50062	220.745	24.0915	219.469	3.62026	219.351	3.23706
14QW136@10	350.959	212.664	0.605952	0.03	0.0510458	1.02089	0.241668	1.82972	0.0343367	1.51845	242.896	23.3547	219.785	3.62246	217.633	3.2503
14QW136@11	228.239	109.705	0.48066	0.07	0.0515405	1.1981	0.239995	1.93468	0.0337716	1.51905	265.076	27.2659	218.416	3.80921	214.11	3.19983
14QW136@12	344.556	143.608	0.416792	0.03	0.0507785	1.02749	0.237708	1.92311	0.0339518	1.62562	230.789	23.556	216.542	3.7572	215.234	3.44204
14QW136@14	606.919	248.555	0.409535	0.02	0.0503939	0.72982	0.235712	1.66821	0.0339236	1.5001	213.202	16.8203	214.903	3.23621	215.058	3.17364
14QW136@16	325.337	143.962	0.442501	0.07	0.0517166	1.37174	0.236716	2.03524	0.0331968	1.50351	272.902	31.136	215.728	3.96324	210.525	3.11489
14QW138 I-type granite
14QW138@01	287.967	173.35	0.60198	0.08	0.0503122	1.03645	0.239757	1.84855	0.0345618	1.53066	209.442	23.8519	218.221	3.63641	219.036	3.29722
14QW138@02	245.506	130.051	0.529725	0.04	0.0519441	1.30914	0.239249	2.13209	0.0334051	1.68284	282.951	29.6747	217.806	4.18815	211.825	3.50769
14QW138@03	142.962	76.6262	0.535989	0.01	0.051371	1.45618	0.238726	2.14735	0.0337039	1.57818	257.513	33.1245	217.377	4.21074	213.688	3.31796
14QW138@04	371.153	150.438	0.405325	0.04	0.0508626	0.902926	0.242718	1.75186	0.03461	1.50125	234.608	20.7042	220.643	3.48018	219.336	3.2382
14QW138@05	426.785	261.591	0.612935	0.04	0.0513437	0.846553	0.242186	1.7309	0.0342106	1.50975	256.291	19.3434	220.209	3.43239	216.847	3.2202
14QW138@06	393.212	174.977	0.444994	0.3	0.0504373	1.47091	0.238354	2.11607	0.0342744	1.52124	215.196	33.7122	217.072	4.14404	217.245	3.25056
14QW138@07	514.143	105.802	0.205783	0.04	0.0504876	0.848948	0.237107	1.72485	0.0340611	1.50147	217.504	19.5342	216.049	3.36231	215.915	3.18899
14QW138@09	400.113	156.309	0.390661	0.01	0.0504867	0.850694	0.232721	1.78532	0.0334316	1.56961	217.462	19.5743	212.442	3.42806	211.99	3.27413
14QW138@13	567.054	96.2164	0.169677	0.08	0.0514334	0.73743	0.236779	1.73058	0.0333885	1.5656	260.301	16.8507	215.779	3.3697	211.721	3.26167
14QW138@14	213.315	90.2332	0.423004	0.07	0.051889	1.23607	0.245066	2.40255	0.0342537	2.06019	280.522	28.0449	222.561	4.81308	217.116	4.40001
14QW138@16	388.134	198.531	0.511502	0.02	0.0498715	0.905323	0.237864	1.77235	0.034592	1.52368	189.009	20.9313	216.67	3.46399	219.224	3.28496
14QW138@17	530.061	290.659	0.54835	0.05	0.0510333	1.11332	0.235246	1.97926	0.0334324	1.63645	242.335	25.4554	214.52	3.83461	211.995	3.41368
14QW145-2 S-type granite
14QW145-2@01	1380.93	118.835	0.0860543	0.02	0.0508417	0.593988	0.230806	2.46604	0.032925	2.39344	233.659	13.6522	210.864	4.70646	208.829	4.91998
14QW145-2@02	618.557	78.2789	0.126551	0.04	0.0511728	0.657944	0.231023	2.48306	0.0327428	2.3943	248.62	15.0745	211.043	4.74264	207.692	4.89537
14QW145-2@03	430.968	84.2	0.195374	0.04	0.050588	0.859737	0.229117	2.55342	0.032848	2.40433	222.102	19.7645	209.47	4.84453	208.349	4.93118
14QW145-2@04	3791.75	10.1631	0.00268033	0.02	0.0504046	0.473228	0.232666	2.46176	0.0334781	2.41585	213.693	10.9254	212.397	4.72905	212.28	5.04682
14QW145-2@05	2138.67	326.043	0.152452	0.01	0.0507016	0.601321	0.23279	2.58666	0.0332998	2.5158	227.286	13.8359	212.499	4.97173	211.167	5.22859
14QW145-2@06	734.157	79.879	0.108804	0.05	0.0513731	0.759809	0.23487	2.56861	0.0331582	2.45366	257.607	17.3678	214.211	4.97275	210.284	5.07839
14QW145-2@07	873.503	18.7492	0.0214644	0.08	0.0505497	0.896681	0.248909	2.55532	0.0357125	2.39283	220.351	20.615	225.689	5.18434	226.202	5.32097	Inherit
14QW145-2@08	2589.19	19.3204	0.00746194	0.03	0.0503178	0.446408	0.238619	2.47782	0.0343939	2.43727	209.7	10.3157	217.289	4.85853	217.99	5.2263	Inherit
14QW145-2@09	3594.44	70.6691	0.0196607	0.04	0.0508453	0.335851	0.231874	2.54635	0.033075	2.5241	233.823	7.73302	211.744	4.87838	209.765	5.21157
Zircon Qinghu standard
qinghu@01	755.841	384.791	0.50909	0.07	0.0496815	0.782548	0.171824	1.71248	0.0250835	1.52323	180.119	18.1378	161.001	2.55284	159.704	2.40322
qinghu@02	995.765	418.064	0.419842	0.01	0.0494044	0.675907	0.172128	1.64748	0.0252689	1.50245	167.068	15.7155	161.264	2.45954	160.869	2.38751
qinghu@03	1172.24	728.149	0.621161	0.01	0.0495469	0.606329	0.171997	1.61984	0.025177	1.50208	173.79	14.0873	161.151	2.41665	160.292	2.37847
qinghu@04	539.207	259.37	0.481022	0.09	0.0504548	0.867359	0.175197	1.73284	0.0251839	1.50015	215.998	19.9607	163.919	2.62643	160.335	2.37603
qinghu@05	1086.68	496.948	0.457308	0.02	0.049504	0.633029	0.170717	1.63562	0.0250112	1.50816	171.769	14.7103	160.041	2.42469	159.249	2.37274
qinghu@06	576.574	268.506	0.465693	0.03	0.0491903	0.757603	0.169815	2.51902	0.0250378	2.40239	156.91	17.6376	159.259	3.71977	159.417	3.78395
qinghu@07	1086.04	694.405	0.63939	0.08	0.0504802	0.850568	0.174808	1.73786	0.0251153	1.51548	217.166	19.5725	163.583	2.62906	159.904	2.39395
qinghu@08	666.145	254.039	0.381357	0.06	0.0499578	0.917044	0.17166	1.7594	0.0249209	1.50151	193.032	21.185	160.859	2.62073	158.682	2.35396
qinghu@09	557.584	310.467	0.556808	0.04	0.050606	0.835191	0.174878	1.73776	0.0250629	1.5239	222.926	19.2006	163.643	2.62981	159.574	2.40235
qinghu@10	576.574	268.506	0.465693	0.03	0.0491903	0.757603	0.169815	2.51902	0.0250378	2.40239	156.91	17.6376	159.259	3.71977	159.417	3.78395
qinghu@11	720.456	346.294	0.480659	0.03	0.0496062	0.853355	0.169539	2.54116	0.0247875	2.3936	176.583	19.7819	159.019	3.7473	157.842	3.7333
# f206: the proportion of common 206Pb in total measured 206Pb.

## Sheet: Table-S2B-LA
Table S2B LA-ICPMS U-Pb zircon data
Analysis	Content (ppm)		Th/U	Isotopic ratios						Isotopic ages(Ma)
	Th	U		207Pb/206Pb	1σ	207Pb/235U	1σ	206Pb/238U	1σ	207Pb/206Pb	1σ	207Pb/235U	1σ	206Pb/238U	1σ	Comment
14QW143 S-type granite
14QW1431	164.902	451.38	0.365329	0.0531346	0.00212733	0.259696	0.0102065	0.035426	0.000343126	344.5	95.36	234.422	8.22854	224.418	2.13969	Inherit
14QW14310	397.04	2210.61	0.179607	0.053516	0.00103373	0.353358	0.00704186	0.0476222	0.000463099	350.055	44.44	307.244	5.28742	299.906	2.85422	Inherit
14QW14311	640.868	407.466	1.57281	0.0542115	0.00266639	0.298488	0.0138041	0.0400997	0.000498427	388.94	111.1	265.219	10.7959	253.451	3.09222	Inherit
14QW14312	451.513	983.314	0.459175	0.0543615	0.00109912	0.474202	0.00908183	0.0630292	0.000418969	387.09	46.2925	394.087	6.26101	394.021	2.5496	Inherit
14QW14313	122.05	251.546	0.4852	0.0516914	0.00247102	0.366017	0.0186896	0.0515743	0.00103945	272.285	104.615	316.697	13.894	324.18	6.3745	Inherit
14QW14314	94.969	810.08	0.117234	0.0977515	0.00149808	3.22863	0.0579982	0.237879	0.00234378	1583.34	28.2375	1464.06	13.9621	1375.66	12.2281	Inherit
14QW14315	56.6399	224.439	0.252362	0.11356	0.00190341	4.062	0.080461	0.260048	0.00418092	1857.41	29.7875	1646.71	16.1784	1490.09	21.4048	Inherit
14QW14316	26.3586	769.885	0.0342371	0.0533502	0.00169602	0.314563	0.0104473	0.0425567	0.000345075	342.65	39.81	277.712	8.07179	268.661	2.13862	Inherit
14QW14317	329.476	1809.9	0.182041	0.0530951	0.000874907	0.361023	0.00669045	0.0490746	0.000478736	331.54	37.0325	312.978	4.9959	308.838	2.94649	Inherit
14QW14318	94.6152	693.321	0.136467	0.0539412	0.00154291	0.243943	0.00685157	0.0327697	0.000295205	368.57	64.81	221.644	5.59471	207.859	1.84605
14QW14319	18.5335	966.948	0.019167	0.0526923	0.00133591	0.242957	0.00599912	0.0333871	0.000238411	316.725	57.4025	220.839	4.90303	211.712	1.49163
14QW1432	212.866	1292.6	0.164681	0.109271	0.00157147	2.73053	0.0430328	0.180305	0.00138084	1787.35	26.08	1336.8	11.748	1068.64	7.56373	Inherit
14QW14320	34.6011	1978.89	0.0174851	0.0507048	0.00109742	0.234718	0.00504874	0.0334441	0.00023357	227.845	49.99	214.086	4.15443	212.067	1.46146
14QW14321	375.717	452.776	0.829808	0.101388	0.00191218	2.3032	0.0486038	0.16403	0.00191322	1649.99	34.88	1213.27	14.9633	979.134	10.6086	Inherit
14QW14322	174.137	493.55	0.352824	0.0541787	0.00148711	0.376697	0.0110455	0.0505316	0.000846555	388.94	61.105	324.605	8.14963	317.785	5.19758	Inherit
14QW14323	96.8545	95.6822	1.01225	0.0603608	0.00347326	0.347489	0.0162379	0.039271	0.000713705	616.685	128.685	302.831	12.2376	248.313	4.42902	Inherit
14QW14324	259.545	1328.29	0.195398	0.0532041	0.00107984	0.272727	0.00541861	0.0370704	0.000245888	344.5	41.6625	244.871	4.32618	234.648	1.53368	Inherit
14QW14325	108.338	947.598	0.114329	0.0584355	0.00149145	0.438728	0.011606	0.0541636	0.00040003	546.33	55.545	369.355	8.19479	340.033	2.45314	Inherit
14QW14326	568.763	1682.31	0.338085	0.0507496	0.00138611	0.239598	0.00631795	0.0341497	0.00025367	227.845	67.58	218.091	5.1773	216.468	1.58558
14QW14327	263.285	1670.79	0.157581	0.112481	0.00162035	4.54401	0.0662928	0.291869	0.00171349	1839.82	26.2375	1739.06	12.1989	1650.86	8.59667	Inherit
14QW14328	1210.6	1798.14	0.673252	0.052595	0.00108404	0.284027	0.00637533	0.0389628	0.000342277	322.28	50.92	253.847	5.04444	246.401	2.12787	Inherit
14QW14329	722.95	1597.6	0.452522	0.0513179	0.00123124	0.265941	0.00626879	0.037532	0.000313895	253.77	55.545	239.443	5.03069	237.517	1.95451	Inherit
14QW1433	132.013	848.034	0.15567	0.0521095	0.00122666	0.296138	0.00676777	0.0411324	0.000284183	300.06	53.7	263.379	5.30483	259.848	1.76517	Inherit
14QW14330	56.3887	593.832	0.0949573	0.0574835	0.00167242	0.419638	0.012901	0.0526502	0.00043476	509.3	58.3275	355.792	9.23048	330.772	2.66845	Inherit
14QW14331	121.508	911.002	0.133378	0.0536521	0.00124042	0.306259	0.00704131	0.0413404	0.000385832	366.72	53.7	271.277	5.47647	261.136	2.39265	Inherit
14QW14332	148.079	1328.5	0.111464	0.0500279	0.00103974	0.256175	0.00549995	0.0369827	0.000311276	194.525	48.14	231.58	4.44847	234.103	1.93918	Inherit
14QW14333	9.80965	521.484	0.018811	0.0596808	0.00296201	0.284873	0.0169439	0.0333769	0.0010236	590.77	108.165	254.516	13.3912	211.648	6.38642
14QW14334	185.884	514.361	0.361388	0.0540249	0.00228113	0.25072	0.00982961	0.033482	0.000360958	372.275	96.2875	227.161	7.98155	212.304	2.25442
14QW14335	569.753	2756.19	0.206717	0.0500601	0.00116936	0.235429	0.00538337	0.0339608	0.000237848	198.23	53.6925	214.671	4.42693	215.29	1.48745
14QW14336	70.9478	3588.67	0.0197699	0.0497411	0.000979236	0.22264	0.00481109	0.0323262	0.000383879	183.415	13.885	204.105	3.99795	205.091	2.39971
14QW14337	628.468	715.169	0.878768	0.0525204	0.00136867	0.274078	0.00724135	0.0377035	0.000327231	309.32	54.625	245.949	5.77346	238.582	2.0369	Inherit
14QW14338	122.14	221.651	0.551046	0.0502183	0.00211846	0.273466	0.0107736	0.0393536	0.00039972	205.63	98.1325	245.461	8.5918	248.825	2.48283	Inherit
14QW14339	220.479	1083.46	0.203496	0.0490584	0.00101805	0.265737	0.00561554	0.0391288	0.000275369	150.085	48.145	239.28	4.50776	247.431	1.71352	Inherit
14QW1434	1380.59	1495.45	0.923197	0.0502743	0.00096535	0.311719	0.00579811	0.0447804	0.000300045	209.33	44.435	275.512	4.49214	282.396	1.85758	Inherit
14QW14340	189.326	395.309	0.478932	0.162232	0.00230094	7.40606	0.108949	0.329744	0.00235927	2479.32	23.7675	2161.7	13.242	1837.14	11.4804	Inherit
14QW14341	84.3528	743.826	0.113404	0.101663	0.0018137	1.97203	0.0770438	0.136895	0.0041369	1654.62	33.0275	1106	26.3325	827.078	23.4613	Inherit
14QW14342	573.458	1080.89	0.530544	0.0568763	0.00121702	0.565517	0.0119893	0.0718738	0.000542985	487.08	46.2925	455.111	7.78232	447.435	3.27452	Inherit
14QW14343	872.361	1213.2	0.719057	0.0532132	0.00105653	0.390732	0.00819131	0.0530239	0.000477601	338.945	41.6625	334.904	5.98487	333.06	2.92931	Inherit
14QW14344	155.109	610.05	0.254256	0.0529569	0.00129705	0.357771	0.00917017	0.048819	0.000533194	327.835	27.775	310.55	6.86098	307.267	3.2814	Inherit
14QW14345	96.5813	3195.23	0.0302267	0.0496899	0.0008404	0.222326	0.0037039	0.0323028	0.000187278	188.97	40.7325	203.844	3.07994	204.945	1.17472
14QW14346	27.763	757.921	0.0366305	0.0597308	0.00107275	0.695091	0.0156863	0.0836397	0.00101505	594.47	38.88	535.854	9.40338	517.811	6.04483	Inherit
14QW14347	1753.34	1935.46	0.905902	0.0583798	0.000836093	0.68211	0.00939772	0.0843397	0.000514271	542.63	26.85	528.049	5.68416	521.974	3.07032	Inherit
14QW14348	651.442	1661.52	0.392075	0.0526383	0.00101135	0.353495	0.0086556	0.0484089	0.00078433	322.28	16.665	307.346	6.49674	304.746	4.82546	Inherit
14QW14349	288.412	485.031	0.594626	0.053647	0.00157778	0.391464	0.0110154	0.0529273	0.000576232	366.72	66.66	335.438	8.0414	332.468	3.53247	Inherit
14QW1435	922.632	1134.91	0.812957	0.0801687	0.00127085	1.46947	0.0247756	0.132233	0.00129193	1266.66	31.1725	917.909	10.2062	800.594	7.36837	Inherit
14QW14350	34.834	1656.65	0.0210268	0.05004	0.00100992	0.228691	0.00462912	0.0329888	0.000290444	198.23	46.2875	209.118	3.82812	209.227	1.81605
14QW14351	120.105	201.346	0.596513	0.0586134	0.00158502	0.808513	0.022158	0.099636	0.000908905	553.74	54.62	601.62	12.4472	612.275	5.33854	Inherit
14QW14352	170.279	377.287	0.451325	0.0544698	0.00147418	0.531206	0.014847	0.0704006	0.000736687	390.79	61.105	432.61	9.84981	438.569	4.44296	Inherit
14QW14353	142.823	663.839	0.215146	0.100384	0.00157208	1.91719	0.0907786	0.134878	0.00535782	1631.48	169.447	1087.09	31.6059	815.631	30.4371	Inherit
14QW14354	141.043	436.602	0.323048	0.05608	0.00187319	0.436613	0.0131922	0.0564681	0.00052872	453.75	69.4375	367.861	9.32744	354.111	3.23184	Inherit
14QW14355	193.449	957.648	0.202004	0.0738358	0.00117506	1.54932	0.0248175	0.151334	0.000991315	1036.73	63.89	950.221	9.90581	908.436	5.57209	Inherit
14QW14356	242.703	1437.68	0.168816	0.105008	0.00175026	2.67301	0.0495769	0.183563	0.00190547	1714.5	31.3225	1321.03	13.7347	1086.41	10.3949	Inherit
14QW14357	209.839	371.084	0.565474	0.0532043	0.00191905	0.346912	0.012124	0.0473402	0.000501478	344.5	81.4725	302.396	9.14215	298.171	3.09081	Inherit
14QW14358	21.6239	360.026	0.060062	0.0614433	0.00180493	0.437616	0.0134684	0.0514866	0.000602378	653.72	62.9525	368.57	9.516	323.642	3.69717	Inherit
14QW14359	155.2	858.899	0.180696	0.0505904	0.00114459	0.278442	0.007132	0.0397724	0.00054219	220.44	51.8425	249.421	5.66702	251.422	3.36423	Inherit
14QW1436	475.718	625.009	0.761137	0.0512277	0.00182316	0.260351	0.00873071	0.036733	0.000363138	250.065	81.47	234.95	7.03558	232.551	2.26149	Inherit
14QW14360	141.053	941.859	0.14976	0.06174	0.00101636	0.682736	0.0134977	0.0797689	0.000967322	664.83	35.9525	528.427	8.15261	494.743	5.78126	Inherit
14QW14361	1190.42	4140.76	0.287487	0.0542277	0.000862032	0.289743	0.00537045	0.0386128	0.000466569	388.94	37.0325	258.357	4.23167	244.229	2.89888	Inherit
14QW14362	33.1648	1706.29	0.0194369	0.0493537	0.00118564	0.268321	0.00696561	0.0393078	0.000498096	164.9	55.545	241.35	5.57889	248.541	3.0924	Inherit
14QW14363	322.644	1017.59	0.317067	0.111641	0.00179594	4.86423	0.0801287	0.3147	0.00246721	1827.78	28.55	1796.08	13.9278	1763.79	12.135	Inherit
14QW14364	207.818	234.704	0.885447	0.0579193	0.0034316	0.34762	0.0195169	0.0437581	0.00065305	527.815	129.613	302.93	14.7068	276.086	4.03609	Inherit
14QW14365	279.158	332.989	0.838341	0.0670842	0.0014245	1.23023	0.0268928	0.132501	0.00120579	840.43	44.4425	814.445	12.2563	802.116	6.87725	Inherit
14QW14366	182.718	280.873	0.650536	0.0548173	0.00172951	0.390119	0.0118013	0.0516495	0.000418167	405.605	70.3625	334.457	8.62304	324.64	2.56927	Inherit
14QW14367	101.057	964.786	0.104746	0.0903908	0.00282037	1.11923	0.0826649	0.0771806	0.00418587	1435.19	59.565	762.608	39.6104	479.272	25.0518	Inherit
14QW14368	46.8957	627.526	0.0747312	0.0554475	0.00148959	0.37788	0.0126527	0.0492085	0.000951897	431.53	65.735	325.477	9.32661	309.66	5.85091	Inherit
14QW14369	149.88	2584.93	0.057982	0.0610494	0.00124001	0.345972	0.00717501	0.0409579	0.000368764	642.61	42.5875	301.687	5.41662	258.768	2.28794	Inherit
14QW1437	709.82	571.577	1.24186	0.0806302	0.00178749	1.41948	0.0348721	0.126641	0.00161132	1212.96	43.36	897.144	14.6475	768.676	9.22898	Inherit
14QW14370	104.498	192.794	0.54202	0.047902	0.00194445	0.227981	0.00843285	0.0345576	0.000371431	94.535	92.585	208.531	6.97433	219.01	2.31744	Inherit
14QW14371	466.418	677.511	0.688429	0.0503466	0.00140553	0.279998	0.00784666	0.0401953	0.000352117	209.33	64.805	250.656	6.22684	254.044	2.18649	Inherit
14QW14372	64.5868	154.186	0.418891	0.0524382	0.00351917	0.456091	0.0305096	0.0630139	0.00117574	305.615	153.682	381.536	21.277	393.929	7.1332	Inherit
14QW14373	43.3975	54.4399	0.797163	0.100814	0.00230853	4.05391	0.112543	0.28964	0.00451698	1639.19	42.59	1645.09	22.6387	1639.73	22.596	Inherit
14QW14374	72.1198	117.581	0.613364	0.161727	0.00230077	10.8545	0.157058	0.48491	0.00362615	2473.76	24.075	2510.75	13.5605	2548.62	15.8022	Inherit
14QW1438	83.2634	565.706	0.147185	0.050783	0.00183947	0.247349	0.00863064	0.0351628	0.000321112	231.55	87.95	224.42	7.02728	222.78	2.00332	Inherit
14QW1439	28.3351	75.5427	0.375086	0.0863959	0.00215609	2.79824	0.0680046	0.234537	0.00235047	1347.22	48.1475	1355.07	18.203	1358.23	12.2954	Inherit
14QW145-1 S-type granite
14QW1451	468.552	544.322	0.860801	0.0622412	0.00134971	0.852409	0.0186122	0.0988587	0.00074258	683.345	46.2925	625.97	10.211	607.717	4.36866	Inherit
14QW14510	140.017	552.857	0.25326	0.052742	0.00201435	0.243126	0.00933969	0.033163	0.000287135	316.725	119.433	220.977	7.63012	210.314	1.79517	Inherit
14QW14511	335.884	1103.63	0.304346	0.0613944	0.00151435	0.351182	0.008419	0.0412169	0.000333941	653.72	53.6975	305.61	6.33011	260.371	2.07228
14QW14512	28.6116	635.39	0.0450301	0.0493239	0.0013062	0.239644	0.0063489	0.0350414	0.000301962	164.9	65.73	218.129	5.20245	222.023	1.88449	Inherit
14QW14513	59.5342	449.127	0.132555	0.0632575	0.00153227	0.588681	0.0148609	0.0668955	0.000674681	716.675	51.845	470.025	9.50349	417.425	4.0828	Inherit
14QW14514	79.7848	3154.62	0.0252914	0.0499546	0.00117058	0.25625	0.00561309	0.0368965	0.000287028	194.525	27.7725	231.64	4.5396	233.567	1.78891	Inherit
14QW14515	113.34	475.613	0.238303	0.0544334	0.00138731	0.485103	0.011972	0.06412	0.000488776	390.79	62.03	401.568	8.18993	400.633	2.96889	Inherit
14QW14516	84.0346	261.739	0.321062	0.0513858	0.00192847	0.261388	0.00930485	0.0370016	0.000438128	257.47	87.025	235.785	7.49187	234.221	2.72651	Inherit
14QW14517	87.9696	476.881	0.184468	0.0557004	0.00128429	0.498982	0.0116662	0.0645316	0.00059048	438.935	56.475	411.013	7.90741	403.126	3.58235	Inherit
14QW14518	54.6367	97.5933	0.559841	0.0567431	0.00252907	0.746874	0.0320493	0.0956764	0.00118231	483.375	93.51	566.409	18.6329	589.021	6.96337	Inherit
14QW14519	880.183	583.735	1.50785	0.0565711	0.00116354	0.642114	0.0135986	0.0816139	0.000641186	475.97	46.2925	503.614	8.41552	505.749	3.83121	Inherit
14QW1452	202.126	708.588	0.285251	0.0642623	0.0018042	0.590205	0.0149706	0.0670467	0.0010954	750.005	54.625	470.999	9.56445	418.339	6.62157	Inherit
14QW14520	53.2296	113.154	0.470419	0.126402	0.0023509	5.31533	0.0987034	0.303365	0.00295979	2049.99	32.2525	1871.33	15.9205	1707.97	14.6681	Inherit
14QW14521	109.128	1163.01	0.0938328	0.0534745	0.00148829	0.244937	0.00648545	0.0330229	0.000257113	350.055	62.9575	222.455	5.29176	209.44	1.60846
14QW14522	118.162	2191.16	0.0539265	0.0511585	0.00129698	0.234454	0.00569002	0.033044	0.000291042	255.62	59.2475	213.869	4.6825	209.571	1.81969
14QW14523	18.7459	3852.41	0.00486601	0.0479689	0.00104465	0.216971	0.00453038	0.0325776	0.00024089	98.24	47.2175	199.386	3.78237	206.66	1.50802
14QW14524	104.55	859.112	0.121695	0.0492065	0.00136035	0.224443	0.0060762	0.0328962	0.000251247	166.75	60.175	205.601	5.04069	208.649	1.5721
14QW14525	3.53812	1952.73	0.00181188	0.0501248	0.000976573	0.230632	0.00464814	0.0331093	0.000284947	211.185	50.915	210.72	3.83781	209.979	1.78163
14QW14526	97.8788	558.919	0.175121	0.0501219	0.00155739	0.227376	0.00683458	0.032784	0.000261	211.185	72.21	208.03	5.65588	207.949	1.63297
14QW14527	72.2309	1025.2	0.0704555	0.0514516	0.00131626	0.265306	0.00717239	0.0371455	0.000472563	261.175	54.6225	238.934	5.75799	235.115	2.93998	Inherit
14QW14528	269.953	1703.15	0.158502	0.0489139	0.00112283	0.226208	0.00506702	0.0332734	0.000301411	142.68	55.55	207.063	4.1982	211.003	1.8839
14QW14529	62.7262	960.974	0.0652735	0.048553	0.00136688	0.224717	0.00629431	0.0332564	0.000296717	127.865	66.66	205.828	5.22034	210.897	1.85469
14QW1453	80.6111	806.414	0.0999624	0.0511398	0.00135791	0.255782	0.00662571	0.0361421	0.000308349	255.62	61.1	231.262	5.35963	228.875	1.92239	Inherit
14QW14530	186.756	868.541	0.215023	0.0582906	0.00173485	0.417331	0.0154941	0.0512058	0.00100951	538.925	64.8025	354.141	11.1027	321.92	6.19315	Inherit
14QW14531	133.326	292.2	0.456283	0.0710865	0.00150015	1.64323	0.0368549	0.166457	0.00179582	961.11	47.2225	986.953	14.1735	992.563	9.93902	Inherit
14QW14532	327.114	305.625	1.07031	0.0800346	0.00147678	2.37136	0.0440312	0.213521	0.00165064	1198.15	37.0325	1234.01	13.2878	1247.55	8.79429	Inherit
14QW14533	54.963	968.191	0.0567688	0.0483579	0.00136194	0.222012	0.00632251	0.0330795	0.000285903	116.755	66.66	203.583	5.25526	209.793	1.78763
14QW14534	142.154	872.518	0.162923	0.056554	0.00153992	0.317258	0.0107157	0.0401621	0.000663833	475.97	59.255	279.791	8.2622	253.838	4.11639	Inherit
14QW14535	115.447	710.921	0.162391	0.0489338	0.00148923	0.224063	0.0069178	0.0330159	0.000271103	146.38	67.5825	205.286	5.74014	209.396	1.69556
14QW14536	44.7261	526.749	0.0849098	0.0505867	0.00157227	0.358838	0.0128489	0.0509361	0.000821146	220.44	74.9875	311.347	9.60356	320.266	5.03986	Inherit
14QW14537	70.0042	595.029	0.117648	0.0559835	0.0018734	0.256801	0.00828017	0.0331632	0.000293689	450.045	74.065	232.086	6.6915	210.315	1.83599
14QW14538	218.157	422.753	0.51604	0.0681183	0.00147803	1.23927	0.0270995	0.131221	0.00142354	872.215	44.445	818.549	12.3007	794.826	8.12356	Inherit
14QW14539	60.8037	160.405	0.379064	0.0509248	0.00372642	0.266385	0.0161124	0.0349026	0.000467937	238.955	170.35	239.8	12.9199	221.159	2.91723	Inherit
14QW1454	122.439	216.86	0.5646	0.0598613	0.001736	0.591401	0.0190982	0.0710012	0.000893708	598.17	30.55	471.762	12.1897	442.185	5.38458	Inherit
14QW14540	15.9278	3975.29	0.00400669	0.0494774	0.000879061	0.225592	0.00385581	0.0328282	0.000234434	172.305	42.585	206.553	3.19756	208.225	1.46754
14QW14541	97.2668	823.854	0.118063	0.0493343	0.00146978	0.225251	0.00647458	0.0329449	0.000277996	164.9	65.73	206.271	5.36741	208.953	1.73858
14QW14543	336.204	1507.55	0.223013	0.0497133	0.00120788	0.227865	0.00529563	0.0329994	0.000296234	188.97	57.3975	208.435	4.38151	209.293	1.85209
14QW14545	92.7192	474.142	0.195552	0.0508905	0.00260906	0.225484	0.0106563	0.0322375	0.000426247	235.25	113.873	206.464	8.83046	204.537	2.66424
14QW14546	179.831	1276.58	0.140869	0.0552091	0.00136064	0.249089	0.00601032	0.0325335	0.00032375	420.42	55.55	225.836	4.88819	206.385	2.02434
14QW14547	53.3335	450.504	0.118386	0.0490954	0.00181504	0.222407	0.00784709	0.0328152	0.000301872	153.79	85.17	203.911	6.5196	208.143	1.88751
14QW14548	44.9785	586.097	0.0767423	0.0472369	0.00218584	0.239275	0.0108737	0.0365343	0.000349693	61.205	107.395	217.827	8.91044	231.315	2.17839	Inherit
14QW14549	75.9765	450.69	0.168578	0.0498209	0.00213753	0.22707	0.00958569	0.0329771	0.000332647	187.12	99.985	207.777	7.93328	209.154	2.07899
14QW1455	128.82	752.813	0.171118	0.047036	0.00132024	0.212579	0.00561503	0.0327166	0.000235408	50.095	66.66	195.714	4.70377	207.528	1.47373
14QW14550	204.675	1162.98	0.175993	0.0496176	0.00132943	0.225204	0.00578308	0.0328309	0.000297914	176.01	58.3225	206.232	4.79475	208.242	1.86283
14QW14552	55.8797	402.531	0.138821	0.0511639	0.00216509	0.230254	0.00937162	0.0327509	0.000370478	255.62	98.135	210.409	7.73613	207.742	2.31524
14QW14553	117.266	707.905	0.165652	0.0483918	0.00168722	0.220324	0.00745603	0.0329472	0.000340636	116.755	81.475	202.179	6.20539	208.967	2.12883
14QW1456	213.251	801.12	0.266192	0.0717547	0.00120111	0.988562	0.0158381	0.0993815	0.00062475	988.89	33.335	697.986	8.10102	610.783	3.67815	Inherit
14QW1457	188.433	2331.55	0.0808185	0.048696	0.00105007	0.222947	0.00484709	0.0329923	0.000263719	131.57	49.995	204.359	4.02682	209.249	1.64962
14QW1458	19.7613	589.463	0.0335242	0.0500951	0.00147564	0.229341	0.00655061	0.0331169	0.000311554	198.23	68.5075	209.655	5.4124	210.026	1.94733
14QW1459	83.6187	230.203	0.363239	0.060174	0.00184628	0.570181	0.0313325	0.0679498	0.00313826	609.28	66.655	458.132	20.2641	423.792	18.9447	Inherit
14QW1460	269.119	770.789	0.349148	0.0573882	0.00199473	0.205985	0.0065721	0.0262148	0.000264624	505.595	80.545	190.178	5.53491	166.814	1.66474	Inherit
14QW1461	273.71	707.049	0.387116	0.111863	0.00161651	4.61857	0.0685585	0.298608	0.00219272	1831.49	27.01	1752.63	12.447	1684.4	10.9228	Inherit
14QW1462	991.899	607.169	1.63365	0.112867	0.00150414	5.01712	0.0710157	0.321331	0.00225782	1845.99	24.075	1822.22	12.0477	1796.23	11.0579	Inherit
14QW1463	463.955	729.812	0.635718	0.128249	0.00185845	4.31905	0.0775538	0.242969	0.00241359	2075.92	24.8475	1697	14.8496	1402.11	12.5405	Inherit
14QW1464	354.862	615.009	0.577002	0.113558	0.00159921	4.818	0.0688032	0.306874	0.00189901	1857.41	26.08	1788.05	12.0692	1725.3	9.41347	Inherit
14QW1465	882.23	777.729	1.13437	0.112887	0.00170098	4.87905	0.0748551	0.312453	0.00203835	1846.61	26.39	1798.64	12.9861	1752.77	10.0565	Inherit
14QW1466	67.5999	242.394	0.278885	0.0749982	0.00168496	1.4471	0.0316506	0.139664	0.000871907	1133.34	44.445	908.671	13.1474	842.761	4.95282	Inherit
BLS10A S-type granite
BLS10A1	245.938	470.765	0.522423	0.15605	0.00241672	8.41532	0.133204	0.388481	0.0032428	2413.27	26.2325	2276.83	14.4485	2115.78	15.0989	Inherit
BLS10A10	354.599	2049.08	0.173053	0.0535574	0.000903597	0.383046	0.00956189	0.0517926	0.00101469	353.76	34.255	329.277	7.02356	325.518	6.22148	Inherit
BLS10A11	38.6863	3773.04	0.0102533	0.0493066	0.000806251	0.225131	0.00381667	0.0330191	0.000249203	161.195	43.5125	206.171	3.16634	209.416	1.55922
BLS10A12	15.5447	3875.38	0.00401114	0.0492713	0.000972583	0.220848	0.00425862	0.032418	0.000227967	161.195	41.66	202.615	3.54459	205.664	1.42775
BLS10A13	142.122	3167.19	0.0448734	0.0506159	0.00121551	0.23362	0.00628847	0.0333415	0.0004057	233.4	55.545	213.183	5.17802	211.428	2.5335
BLS10A14	339.381	1441.45	0.235444	0.0541987	0.00104139	0.51446	0.0114023	0.0686547	0.000879733	388.94	37.96	421.444	7.65014	428.046	5.31182	Inherit
BLS10A15	169.62	1543.22	0.109913	0.0483419	0.00117888	0.214784	0.00526789	0.0321394	0.000266218	122.31	57.4025	197.559	4.40524	203.924	1.66636
BLS10A16	359.425	3645.91	0.0985833	0.0517955	0.000904713	0.239182	0.00494465	0.0333784	0.000405323	275.99	40.7375	217.75	4.05434	211.658	2.53107
BLS10A17	40.6909	185.112	0.219818	0.110545	0.00379109	1.2684	0.0557789	0.0813027	0.00201988	1809.26	61.5775	831.675	24.9742	503.894	12.045	Inherit
BLS10A18	153.491	3972.39	0.0386394	0.0524707	0.001116	0.246243	0.00573482	0.0339175	0.000442074	305.615	48.145	223.52	4.67495	215.02	2.75875
BLS10A19	196.847	2018.61	0.097516	0.048486	0.00100497	0.220142	0.00477421	0.032787	0.000306047	124.16	49.995	202.028	3.9754	207.967	1.91357
BLS10A2	208.963	5163.29	0.0404708	0.0626645	0.00108915	0.298674	0.0073759	0.0342385	0.000458454	698.16	41.6625	265.364	5.76975	217.021	2.85995
BLS10A20	485.949	1321.74	0.36766	0.0509505	0.00124898	0.269481	0.00646562	0.0382123	0.000259696	238.955	52.7675	242.279	5.17409	241.742	1.61777	Inherit
BLS10A21	345.578	1226.13	0.281844	0.0557608	0.00105714	0.546458	0.0105905	0.0708498	0.000680773	442.64	8.3325	442.674	6.96006	441.274	4.10511	Inherit
BLS10A22	276.523	3033.54	0.0911551	0.0493998	0.000895595	0.220788	0.00424253	0.0322369	0.000296117	168.6	42.585	202.565	3.53139	204.533	1.85257
BLS10A23	211.723	1842.22	0.114928	0.0494451	0.00113482	0.230533	0.00567406	0.0335382	0.000318962	168.6	49.065	210.638	4.68418	212.655	1.99275
BLS10A24	257.698	1579.56	0.163145	0.0940668	0.00223026	1.86059	0.111736	0.131379	0.00658463	1509.57	44.445	1067.2	39.6678	795.728	37.5206	Inherit
BLS10A25	199.43	3024.43	0.0659395	0.050836	0.00101405	0.219735	0.00430999	0.0311389	0.000244463	231.55	46.285	201.69	3.59052	197.672	1.53204
BLS10A26	364.912	723.2	0.50458	0.0808025	0.00119954	2.16643	0.045803	0.192654	0.00292189	1216.66	34.255	1170.34	14.7093	1135.73	15.805	Inherit
BLS10A27	53.0443	711.835	0.0745177	0.0486937	0.0011978	0.220234	0.00526031	0.0327266	0.000254773	131.57	57.4	202.104	4.37937	207.591	1.59427
BLS10A28	212.652	3790.09	0.0561073	0.051823	0.000844094	0.210616	0.00341042	0.0293397	0.000168886	275.99	41.6625	194.069	2.86348	186.414	1.06246
BLS10A29	1328.7	1420.57	0.935328	0.0686518	0.0013872	0.34938	0.00691298	0.0368224	0.000270176	888.58	36.885	304.255	5.206	233.106	1.68452	Inherit
BLS10A3	102.181	763.416	0.133847	0.0469111	0.00131209	0.220923	0.00591203	0.0341004	0.000231274	55.65	53.7	202.678	4.91868	216.16	1.44644
BLS10A30	214.049	2175.51	0.09839	0.0516416	0.00109665	0.233989	0.00526831	0.0327397	0.000307777	333.39	48.1425	213.486	4.33744	207.672	1.92443
BLS10A31	625.655	650.296	0.962108	0.106417	0.00174301	3.82139	0.0626187	0.259829	0.00169529	1739.19	29.7825	1597.26	13.2321	1488.97	8.71183	Inherit
BLS10A32	44.9141	93.2806	0.481494	0.0613117	0.0033461	0.342635	0.0166276	0.0398015	0.000546387	650.015	118.502	299.167	12.5765	251.603	3.39014	Inherit
BLS10A33	317.543	4272	0.0743313	0.0532481	0.00112744	0.225958	0.00500602	0.0306598	0.00021562	338.945	43.515	206.857	4.14855	194.677	1.35272
BLS10A34	265.242	2300.21	0.115312	0.0487903	0.00137873	0.203903	0.0053257	0.0303131	0.000260418	200.075	66.6575	188.423	4.49357	192.508	1.63268
BLS10A35	445.761	4783.26	0.0931918	0.047596	0.000817134	0.187584	0.00309808	0.0285306	0.00014888	79.72	40.7375	174.566	2.65151	181.346	0.938241
BLS10A36	123.963	1223.79	0.101294	0.0518675	0.00162363	0.233563	0.00735328	0.0325777	0.000291525	279.69	72.2125	213.136	6.05444	206.661	1.82342
BLS10A37	127.277	1326.21	0.0959707	0.0488285	0.00204293	0.220176	0.00877048	0.0327575	0.000300233	138.975	98.1325	202.056	7.29975	207.783	1.87739
BLS10A4	85.1302	2958.5	0.0287748	0.0536646	0.00114136	0.246687	0.0056747	0.0331595	0.00029024	366.72	48.1425	223.881	4.62435	210.292	1.81451
BLS10A5	113.768	577.338	0.197057	0.0469264	0.001366	0.209156	0.00566631	0.0324412	0.000258882	55.65	66.66	192.844	4.76006	205.809	1.62024
BLS10A6	700.217	1472.04	0.475677	0.05174	0.00131732	0.287834	0.00729115	0.0402466	0.000301982	272.285	59.2525	256.853	5.75131	254.361	1.87642
BLS10A7	65.2697	3652.66	0.0178691	0.0481478	0.000954718	0.217544	0.00455976	0.0326787	0.000265718	105.645	48.145	199.864	3.80509	207.292	1.66249
BLS10A8	112.813	695.911	0.162108	0.0510773	0.00138767	0.331957	0.00951616	0.0471592	0.000585957	242.66	58.3225	291.058	7.2571	297.057	3.61077	Inherit
BLS10A9	69.1889	498.896	0.138684	0.0649606	0.00113459	1.18918	0.0286893	0.132489	0.00228431	772.225	32.405	795.579	13.3176	802.047	13.0101	Inherit
BLS1741 barren pegmatite
BLS1741A1	612.003	1510.26	0.40523	0.0538966	0.00112038	0.326449	0.00668431	0.0437495	0.000328959	368.57	46.29	286.851	5.12049	276.032	2.03718	Inherit
BLS1741A10	84.1807	2512.94	0.0334989	0.0688042	0.00136439	0.466883	0.0158839	0.0484512	0.00112534	894.445	40.74	389.034	10.9981	305.006	6.92111	Inherit
BLS1741A11	67.1224	3165.76	0.0212027	0.0521419	0.000992312	0.23896	0.00469058	0.0330699	0.000253963	300.06	44.44	217.569	3.84698	209.733	1.58879
BLS1741A12	75.0827	687.108	0.109273	0.0502896	0.00145481	0.229171	0.0064731	0.0329617	0.00026079	209.33	66.655	209.514	5.34914	209.058	1.63142
BLS1741A13	17.9846	1137.45	0.0158114	0.0490303	0.00112382	0.223234	0.00499421	0.0329531	0.000243812	150.085	58.325	204.598	4.14793	209.004	1.52575
BLS1741A14	25.2159	1026.12	0.024574	0.0510939	0.00133963	0.233372	0.00594079	0.0330358	0.000231294	255.62	61.1	212.978	4.89295	209.52	1.44776
BLS1741A15	562.025	2706.09	0.207689	0.050019	0.00102729	0.230527	0.00521307	0.0332182	0.000329205	194.525	48.14	210.634	4.304	210.658	2.05711
BLS1741A16	808.425	1152.35	0.701545	0.0558867	0.00113807	0.517315	0.0110214	0.0668117	0.000651791	455.6	16.665	423.356	7.38111	416.918	3.945	Inherit
BLS1741A19	36.1888	480.555	0.0753063	0.066168	0.00179589	0.628209	0.0241704	0.0675466	0.00150015	812.96	62.0325	494.979	15.0769	421.358	9.06154	Inherit
BLS1741A2	15.5674	548.733	0.0283697	0.0522458	0.00202524	0.237082	0.00926198	0.0328134	0.000386914	294.505	88.8775	216.028	7.60355	208.132	2.41758
BLS1741A20	25.8965	2054.02	0.0126077	0.0506785	0.000869729	0.234827	0.00416586	0.0333896	0.000236457	233.4	38.88	214.175	3.42863	211.728	1.47947
BLS1741A21	83.4471	815.146	0.102371	0.0496488	0.00170879	0.224197	0.00772959	0.0326001	0.000269426	188.97	81.4675	205.397	6.41265	206.801	1.6857
BLS1741A22	13.293	912.301	0.0145709	0.0502166	0.00129678	0.233566	0.00607796	0.0335957	0.000290419	205.63	61.1	213.138	5.00504	213.014	1.81496
BLS1741A23	31.0464	573.72	0.0541141	0.114471	0.00183858	5.05148	0.0831204	0.317622	0.00256744	1872.22	29.6275	1828	14.0021	1778.1	12.5977	Inherit
BLS1741A24	153.222	934.08	0.164035	0.0694397	0.00110253	1.41809	0.0226365	0.147152	0.00111334	922.22	32.25	896.56	9.52485	884.979	6.27461	Inherit
BLS1741A25	114.716	729.199	0.157317	0.052083	0.00137283	0.248138	0.00614913	0.0345169	0.000261808	300.06	59.2525	225.063	5.00477	218.756	1.63568
BLS1741A26	1265.84	1537.15	0.823494	0.0510485	0.00105539	0.283198	0.00571161	0.0400292	0.00026273	242.66	52.7675	253.191	4.52283	253.014	1.6342	Inherit
BLS1741A27	98.6753	1486.36	0.0663874	0.0516143	0.0014136	0.239763	0.00621565	0.0336507	0.000364876	333.39	60.1775	218.226	5.09286	213.356	2.27848
BLS1741A28	171.873	722.981	0.237729	0.0512604	0.00147431	0.280058	0.00869856	0.0395439	0.000498244	253.77	66.655	250.703	6.90208	250.005	3.09266	Inherit
BLS1741A29	64.1084	660.778	0.0970196	0.0506714	0.00173288	0.232544	0.00798618	0.0332061	0.000377174	233.4	77.765	212.296	6.58069	210.583	2.35602
BLS1741A3	20.9542	1214.04	0.01726	0.0486034	0.00130341	0.22256	0.00587016	0.0330929	0.00027746	127.865	62.955	204.038	4.87737	209.877	1.73504
BLS1741A30	44.379	516.57	0.0859109	0.048927	0.0015444	0.226133	0.00699464	0.033516	0.000291447	142.68	69.435	207.001	5.7941	212.516	1.82148
BLS1741A31	41.6169	1967.63	0.0211508	0.0499796	0.00125134	0.228731	0.00557944	0.0331577	0.000331917	194.525	24.995	209.151	4.61286	210.281	2.07412
BLS1741A32	564.055	632.8	0.891363	0.0517268	0.00168814	0.279289	0.00955923	0.0389764	0.000424944	272.285	74.06	250.093	7.58915	246.485	2.63996	Inherit
BLS1741A33	146.744	1632.15	0.0899084	0.0486613	0.00154772	0.227316	0.00779524	0.033742	0.000317521	131.57	78.6925	207.981	6.45071	213.926	1.98343
BLS1741A34	48.1215	2271.64	0.0211835	0.0490936	0.00137301	0.212168	0.00572196	0.0312731	0.000273391	153.79	64.805	195.37	4.79489	198.511	1.71231
BLS1741A35	46.4177	2126.69	0.0218263	0.0474705	0.00157994	0.206841	0.00698652	0.031457	0.000263198	72.315	77.77	190.898	5.87959	199.66	1.64847
BLS1741A36	75.2684	946.545	0.0795191	0.0477145	0.00152115	0.221521	0.00664497	0.0337206	0.000405272	83.425	78.695	203.175	5.52532	213.792	2.52997
BLS1741A37	255.597	815.04	0.313601	0.0496348	0.00173182	0.223237	0.00790702	0.032503	0.000349723	188.97	81.4675	204.601	6.56492	206.195	2.18633
BLS1741A38	138.369	1098.56	0.125955	0.157451	0.00211998	7.54851	0.157548	0.344903	0.00514663	2428.7	22.8375	2178.76	18.7719	1910.22	24.6905	Inherit
BLS1741A4	65.6421	6926.5	0.00947694	0.0526594	0.0009967	0.24523	0.0045468	0.0337792	0.000407215	322.28	16.665	222.694	3.71063	214.158	2.54193
BLS1741A5	49.8845	2941.39	0.0169595	0.049697	0.000877276	0.224663	0.00441765	0.0326315	0.000320285	188.97	40.7325	205.783	3.6654	206.997	2.00257
BLS1741A6	45.0565	2290.79	0.0196686	0.0508806	0.000983392	0.238999	0.00493718	0.0339669	0.000422168	235.25	44.435	217.6	4.04882	215.328	2.63463
BLS1741A7	155.966	3512.35	0.044405	0.0500844	0.000823065	0.225716	0.00435904	0.032541	0.000383834	198.23	34.25	206.656	3.61376	206.432	2.39896
BLS1741A8	10.1649	4598.57	0.00221045	0.0490371	0.00088957	0.223444	0.0041095	0.0328805	0.00022107	150.085	42.5875	204.772	3.41347	208.551	1.38433
BLS1741A9	107.867	303.935	0.354901	0.0544117	0.00180243	0.351506	0.0117585	0.0468058	0.000533558	387.09	69.4375	305.853	8.83661	294.881	3.2896	Inherit
BLS46 barren pegmatite
BLS46A10	7.90593	2308.02	0.00342541	0.0560288	0.00164162	0.242113	0.00670349	0.0311692	0.000212401	453.75	64.8075	220.149	5.48191	197.862	1.33213
BLS46A15	20.3717	3661.23	0.00556418	0.0625774	0.00267704	0.273433	0.0123604	0.0313624	0.000221352	694.455	91.8125	245.435	9.85706	199.069	1.3877
BLS46A16	20.9346	3527.38	0.0059349	0.0539346	0.00101082	0.248886	0.00456753	0.0333079	0.000303122	368.57	42.59	225.671	3.71672	211.218	1.8945
BLS46A18	8.51644	3715.01	0.00229244	0.0499333	0.00100032	0.221758	0.00441889	0.0319651	0.000211073	190.82	46.2875	203.372	3.67507	202.835	1.32306
BLS46A2	17.7821	3253.29	0.00546588	0.053076	0.00110739	0.240004	0.00501159	0.032691	0.000238159	331.54	52.7725	218.424	4.10645	207.368	1.49088
BLS46A21	20.5217	3264.84	0.00628567	0.0616174	0.0017361	0.267187	0.00707938	0.0312541	0.000263313	661.125	61.105	240.442	5.67498	198.392	1.64946
BLS46A24	63.7158	7303.68	0.0087238	0.0740141	0.00313245	0.342674	0.0202401	0.0326874	0.000869689	1042.6	85.65	299.196	15.3078	207.346	5.43007
BLS46A4	9.09885	1895.7	0.00479973	0.0552656	0.00138538	0.247988	0.00612094	0.032488	0.000369962	433.38	57.4	224.94	4.98244	206.101	2.31257
BLS46A5	137.393	3779.28	0.0363542	0.068865	0.00124278	0.317275	0.00625559	0.0332639	0.00035952	894.445	37.04	279.804	4.82569	210.944	2.24589
BLS46A7	15.8695	4837.59	0.00328044	0.051144	0.00098477	0.23309	0.00442069	0.0328441	0.000226796	255.62	44.4375	212.746	3.64307	208.324	1.41999
BLS46A28	227.982	335.944	0.678633	0.134455	0.0018294	6.59951	0.107288	0.354055	0.00349035	2157.1	23.7675	2059.28	14.4031	1953.93	16.6504	Inherit
BLS46A29	151.51	290.645	0.52129	0.129192	0.00190092	6.63571	0.112842	0.370024	0.00427745	2086.73	25.9275	2064.11	15.071	2029.51	20.1566	Inherit
BLS46A30	110.473	227.491	0.485613	0.130602	0.00208536	7.4535	0.11605	0.410922	0.00285325	2105.86	60.1875	2167.42	14.0169	2219.14	13.0913	Inherit
BLS46A31	132.582	233.334	0.568205	0.133431	0.00192405	7.53321	0.1166	0.407043	0.00318972	2143.52	25.3075	2176.95	13.9533	2201.39	14.6621	Inherit
BLS46A33	194.312	278.783	0.697002	0.132064	0.00221185	7.10233	0.128316	0.387836	0.00439027	2125.61	29.3175	2124.34	16.1453	2112.78	20.4244	Inherit
BLS46A34	625.802	806.462	0.775985	0.123624	0.00195712	4.91923	0.102933	0.285427	0.00385008	2008.95	28.0825	1805.56	17.6997	1618.64	19.3279	Inherit
BLS46A35	440.889	505.321	0.872493	0.131202	0.00188069	6.67197	0.0952665	0.366189	0.00266887	2113.89	25.3075	2068.92	12.6867	2011.44	12.6399	Inherit
BLS46A36	170.755	310.954	0.549131	0.128525	0.00178893	7.30126	0.111732	0.40856	0.00335636	2079.62	24.23	2148.96	13.7446	2208.34	15.4069	Inherit
BLS46A37	848.417	818.535	1.03651	0.127922	0.00176568	4.80324	0.0817914	0.269782	0.00281288	2069.43	19.4475	1785.47	14.3623	1539.7	14.3046	Inherit
BLS46A38	363.871	470.596	0.773215	0.125482	0.00175753	5.19555	0.0797832	0.298324	0.00296451	2035.49	25.1525	1851.89	13.1361	1682.99	14.7474	Inherit
BLS1724 rare-metal pegmatite
BLS1724A1	5.82056	3207.54	0.00181465	0.0519285	0.00101641	0.239026	0.00582887	0.0331695	0.000476363	283.395	46.2925	217.623	4.77906	210.355	2.97441
BLS1724A10	7.9061	3404.5	0.00232225	0.0522208	0.00191439	0.238016	0.00866973	0.0331911	0.000448588	294.505	83.325	216.794	7.11218	210.489	2.80119
BLS1724A11	14.8861	5045.54	0.00295034	0.0516851	0.00108413	0.223012	0.00464588	0.0311356	0.000177154	272.285	43.515	204.413	3.85966	197.652	1.11265
BLS1724A13	16.1451	3557.09	0.00453884	0.0599111	0.00174514	0.273347	0.00831339	0.0328722	0.00024216	611.13	30.55	245.366	6.6313	208.499	1.51557
BLS1724A2	19.2175	4354.83	0.00441292	0.067421	0.00186583	0.295891	0.00786266	0.031796	0.000382396	849.995	57.41	263.186	6.16331	201.779	2.3916
BLS1724A3	8.79634	4305.18	0.0020432	0.0500335	0.000994181	0.22564	0.00468494	0.0325481	0.000259044	198.23	46.2875	206.593	3.88379	206.476	1.6211
BLS1724A5	4.91358	3380.96	0.00145331	0.0479552	0.00119102	0.213602	0.00513553	0.032203	0.000268609	98.24	57.4025	196.571	4.29881	204.321	1.68117
BLS1724A6	11.951	3349.71	0.00356778	0.0515501	0.00085208	0.239093	0.00404236	0.0335367	0.000297119	264.88	37.0325	217.677	3.31585	212.646	1.85675
BLS1724A7	7.48877	3990.69	0.00187656	0.0512794	0.00115768	0.23148	0.00516482	0.0325799	0.000206154	253.77	47.215	211.42	4.26094	206.675	1.29185
BLS1724A8	28.7102	2734.05	0.010501	0.0509493	0.00133006	0.233459	0.00595458	0.033111	0.000267377	238.955	61.1	213.05	4.90395	209.989	1.67223
Zircon standards
GJ-1	7.8206	268.077	0.0291729	0.0587922	0.00128173	0.797793	0.0166233	0.0982912	0.000630103	561.145	41.6575	595.583	9.39748	604.387	3.71276
GJ-1	7.91535	271.751	0.0291272	0.0572387	0.00119045	0.776428	0.0156508	0.0981252	0.00059304	501.89	46.29	583.444	8.95459	603.413	3.49659
GJ-1	8.06966	273.363	0.02952	0.0614606	0.00133967	0.818714	0.0179118	0.096291	0.000651586	655.26	46.29	607.331	10.0086	592.636	3.8448
GJ-1	8.29769	278.141	0.0298327	0.0596602	0.0013115	0.796824	0.0172914	0.0966482	0.00066808	590.77	48.1375	595.036	9.7797	594.736	3.94028
GJ-1	8.80862	301.08	0.0292567	0.05986	0.00154286	0.823816	0.0210976	0.0992126	0.000939084	598.17	55.545	610.175	11.7531	609.793	5.51717
GJ-1	8.73471	303.132	0.0288149	0.0597808	0.00139741	0.822865	0.0189845	0.0992555	0.000855961	594.47	56.47	609.646	10.583	610.044	5.03045
GJ-1	8.77814	297.4	0.0295162	0.0620894	0.00147465	0.844525	0.0209521	0.0980428	0.000808366	675.94	47.2175	621.64	11.5416	602.929	4.75693
GJ-1	8.75537	296.43	0.029536	0.0589685	0.00145793	0.803819	0.0198947	0.098455	0.000821071	564.85	49.065	598.98	11.2063	605.348	4.82963
GJ-1	8.68315	296.992	0.029237	0.0599635	0.00123614	0.833301	0.0178132	0.100265	0.000887798	611.13	44.435	615.442	9.87482	615.963	5.2122
GJ-1	8.47341	294.949	0.0287284	0.0623739	0.00193984	0.858688	0.0263203	0.0996018	0.000816079	687.05	66.66	629.407	14.3849	612.075	4.79566
GJ-1	8.59038	300.065	0.0286284	0.0599975	0.00123393	0.819766	0.0169277	0.0986781	0.000783487	611.13	44.435	607.918	9.45425	606.658	4.60871
GJ-1	8.63075	297.652	0.0289962	0.0587375	0.0011674	0.806342	0.0158846	0.0991342	0.000773397	566.7	44.435	600.4	8.93839	609.333	4.54789
GJ-1	7.75352	269.26	0.0287957	0.0606724	0.00124902	0.816332	0.0162366	0.0974196	0.000685345	627.795	44.4375	606	9.08606	599.269	4.03881
GJ-1	7.60433	266.48	0.0285362	0.0594455	0.00120972	0.794151	0.0158819	0.0966564	0.000634181	583.36	44.435	593.524	8.99727	594.784	3.74168
GJ-1	7.84159	272.28	0.0287998	0.0604079	0.0011884	0.825131	0.0165086	0.0986696	0.000649597	616.685	42.5825	610.907	9.19369	606.608	3.82554
GJ-1	7.70713	266.668	0.0289016	0.0589459	0.00127477	0.800434	0.0167807	0.0982795	0.000735493	564.85	48.1375	597.073	9.47246	604.318	4.32933
GJ-1	7.7253	270.214	0.0285895	0.0592807	0.00115639	0.799041	0.0154131	0.0977833	0.000659874	575.96	10.1825	596.288	8.70865	601.405	3.8885
GJ-1	7.75691	270.849	0.0286392	0.0602791	0.00130552	0.810303	0.0168133	0.0977035	0.000652374	612.98	48.1375	602.624	9.43931	600.936	3.84488
GJ-1	8.1899	276.539	0.0296157	0.0592148	0.00129901	0.808056	0.0172325	0.0986667	0.000688875	575.96	46.2875	601.363	9.68623	606.591	4.05522
GJ-1	8.32239	278.675	0.0298641	0.0606785	0.00134933	0.823223	0.0181784	0.098051	0.000732733	627.795	43.5125	609.845	10.1324	602.977	4.31402
GJ-1	8.17884	277.467	0.0294768	0.0578556	0.00127413	0.778164	0.017066	0.0972478	0.000618323	524.11	48.1425	584.435	9.75328	598.26	3.64703
GJ-1	8.22607	279.926	0.0293866	0.0583222	0.00123183	0.787183	0.0168031	0.097611	0.000636064	542.63	46.29	589.573	9.55504	600.393	3.74973
GJ-1	7.67223	270.845	0.028327	0.0604294	0.00118141	0.812514	0.0156309	0.0969487	0.000658683	620.39	42.5825	603.863	8.76615	596.502	3.88424
GJ-1	7.80743	271.741	0.0287311	0.0591653	0.00134693	0.796945	0.0178268	0.0970087	0.000653263	572.255	48.14	595.104	10.0814	596.855	3.85231
GJ-2	7.97207	275.119	0.0289769	0.0613038	0.00116158	0.827332	0.0152285	0.0975257	0.000579702	650.015	45.365	612.131	8.47215	599.893	3.42031
GJ-2	7.69604	270.783	0.0284214	0.0593069	0.00135748	0.809366	0.0176309	0.0987866	0.000710522	588.915	49.99	602.098	9.90259	607.294	4.1814
GJ-2	7.78677	269.627	0.0288798	0.0591439	0.00124838	0.809928	0.0165164	0.0988429	0.000645433	572.255	46.2875	602.414	9.27487	607.624	3.80065
GJ-2	9.39566	315.229	0.0298058	0.060031	0.00155167	0.826336	0.0216508	0.0993733	0.00104746	605.575	57.3975	611.577	12.0443	610.735	6.15084
GJ-2	9.63425	320.076	0.0300999	0.0593395	0.00153704	0.814819	0.0209818	0.0993564	0.000921385	588.915	55.545	605.154	11.7464	610.636	5.41288
GJ-2	8.19237	274.967	0.029794	0.0536483	0.00131034	0.717338	0.0180843	0.0962066	0.000932754	366.72	53.7	549.094	10.699	592.14	5.49452
GJ-2	9.36285	314.078	0.0298106	0.0610302	0.00144292	0.813896	0.018635	0.0966061	0.000743149	638.905	56.4725	604.637	10.4396	594.488	4.38039
GJ-2	9.1505	306.481	0.0298567	0.0582177	0.00124751	0.801739	0.0167709	0.0997057	0.00086379	538.925	41.66	597.809	9.46009	612.684	5.07429
GJ-2	9.33594	310.301	0.0300868	0.0627047	0.00148112	0.846376	0.0203776	0.0979129	0.000892411	698.16	46.135	622.658	11.2143	602.166	5.24989
GJ-2	7.70736	267.286	0.0288356	0.060038	0.00123243	0.820632	0.0171128	0.0987919	0.000681679	605.575	44.435	608.401	9.55293	607.325	4.01271
GJ-2	7.83255	270.048	0.0290042	0.0587231	0.00129665	0.809103	0.0176212	0.0995368	0.000673664	566.7	48.1375	601.951	9.89859	611.694	3.96338
GJ-2	8.07132	279.782	0.0288486	0.0608202	0.00133317	0.81899	0.0179637	0.0975438	0.000672828	631.5	48.14	607.485	10.036	599.999	3.96511
GJ-2	8.11083	266.186	0.0304705	0.0598462	0.001331	0.815652	0.018433	0.0983586	0.000698814	598.17	52.7675	605.62	10.3167	604.783	4.11441
GJ-2	8.44367	271.455	0.0311052	0.0616184	0.00128581	0.831804	0.0175072	0.0974613	0.000638314	661.125	44.44	614.613	9.71339	599.514	3.76337
GJ-2	8.3781	275.012	0.0304645	0.0607735	0.00130052	0.817031	0.017353	0.0972881	0.00066767	631.5	46.29	606.391	9.70586	598.497	3.93576
GJ-2	8.36346	277.315	0.0301587	0.0582544	0.00126688	0.787794	0.0169024	0.0977225	0.00070107	538.925	43.5125	589.92	9.60812	601.048	4.12983
Plešovice	93.4522	789.888	0.118311	0.0535137	0.000933824	0.397123	0.00662233	0.0535709	0.000286376	350.055	40.735	339.559	4.81843	336.408	1.76162
Plešovice	96.5421	844.936	0.11426	0.0528418	0.00099897	0.396851	0.00711868	0.0541842	0.000296419	320.43	42.59	339.362	5.17977	340.159	1.82191
Plešovice	100.238	878.365	0.114119	0.0533385	0.000942815	0.402361	0.00708617	0.0545199	0.000302649	342.65	40.7375	343.359	5.13607	342.212	1.85934
Plešovice	103.117	911.863	0.113083	0.0533094	0.00098425	0.399034	0.00722845	0.0541267	0.000292479	342.65	42.5875	340.947	5.25135	339.807	1.79801
Plešovice	64.1209	769.133	0.0833678	0.0518609	0.00109031	0.398423	0.00850888	0.0553326	0.000459161	279.69	48.1425	340.503	6.18256	347.178	2.81101
Plešovice	55.6515	683.045	0.0814756	0.051857	0.0011752	0.391958	0.00884075	0.0545631	0.00048476	279.69	49.07	335.799	6.45305	342.476	2.96904
Plešovice	57.0434	611.701	0.0932537	0.0545087	0.00133003	0.413721	0.0104784	0.0547562	0.000506722	390.79	55.55	351.551	7.52971	343.656	3.10251
Plešovice	52.8166	607.593	0.0869275	0.0530827	0.00141766	0.398271	0.0106011	0.0542431	0.000512099	331.54	28.7	340.394	7.70165	340.519	3.13674
Plešovice	59.3475	634.643	0.0935132	0.0526901	0.00104152	0.396871	0.00758885	0.05453	0.000405766	322.28	13.8875	339.377	5.52115	342.274	2.48735
Plešovice	52.3272	613.39	0.0853082	0.053773	0.00120352	0.406523	0.00933963	0.0546252	0.000421877	361.165	51.845	346.368	6.74648	342.855	2.58537
Plešovice	56.6389	671.299	0.0843721	0.0530792	0.00107004	0.400036	0.00803533	0.054407	0.000447155	331.54	44.44	341.674	5.83229	341.521	2.74002
Plešovice	115.57	1233.98	0.0936568	0.052072	0.000958313	0.393066	0.00737233	0.0543789	0.000425569	287.1	37.96	336.607	5.37844	341.35	2.60842
Plešovice	88.7506	772.049	0.114955	0.0539118	0.000973787	0.402711	0.00710777	0.0540086	0.000317101	368.57	40.7375	343.613	5.15042	339.086	1.94804
Plešovice	94.8236	832.112	0.113955	0.0527363	0.000985569	0.39767	0.00728532	0.0544824	0.000313367	316.725	45.365	339.957	5.29771	341.983	1.9246
Plešovice	101.336	886.839	0.114267	0.0539273	0.00104278	0.399655	0.00779527	0.0535347	0.000295435	368.57	42.59	341.398	5.65986	336.186	1.81682
Plešovice	99.5523	846.042	0.117668	0.0529349	0.000980449	0.395658	0.00725407	0.0540239	0.000270538	327.835	42.5875	338.494	5.28257	339.179	1.66472
Plešovice	120.321	833.033	0.144438	0.0534186	0.0008714	0.400815	0.00652899	0.0543434	0.000313292	346.35	37.0325	342.239	4.73827	341.133	1.92435
Plešovice	133.497	919.488	0.145186	0.0526617	0.000944931	0.39215	0.00722833	0.0538994	0.00036986	322.28	40.7375	335.939	5.27702	338.417	2.2697
Plešovice	137.143	855.053	0.160392	0.0516592	0.000958297	0.385251	0.00706385	0.0538326	0.000314323	333.39	47.2175	330.894	5.18266	338.009	1.93139
Plešovice	135.821	850.095	0.159772	0.0524285	0.000979652	0.391614	0.00731509	0.0539089	0.000330117	305.615	42.5875	335.548	5.34229	338.476	2.02747
Plešovice	134.713	846.471	0.159147	0.0522549	0.000900856	0.385051	0.00665431	0.0533035	0.000295103	298.21	43.515	330.748	4.88347	334.772	1.81511
Plešovice	149.164	1125.32	0.132552	0.0526212	0.000899991	0.389803	0.00676262	0.0535985	0.000298941	322.28	38.885	334.225	4.94596	336.577	1.83807
Plešovice	128.926	829.006	0.155518	0.054108	0.00102945	0.403189	0.00761006	0.0537658	0.000293201	375.98	42.5875	343.959	5.51179	337.6	1.8029
Plešovice	127.044	833.543	0.152414	0.0539816	0.000985998	0.403307	0.00728367	0.0538689	0.000301336	368.57	40.7375	344.044	5.2754	338.231	1.85227

## Sheet: Table-S3-zircon TE
Table S-3 In situ LA-ICPMS zircon trace elements data for the Western Kunlun rocks
Sample no.	Rock type	206Pb/238U Age (Ma)	1sigma	Concordance	Comment	Li	P	Ti	Y	Nb	La	Ce	Pr	Nd	Sm	Eu	Gd	Tb	Dy	Ho	Er	Tm	Yb	Lu	Hf	Ta	Th	U
14QW143-1	S-type granite	224.418	2.13969	95%	Inherited	45.0732	580.713	8.52237	1500.6	2.79835	0.199249	20.6842	0.172158	2.07761	4.56757	1.60334	26.7421	9.92551	126.516	51.0143	244.977	56.1893	552.448	122.688	12309.7	1.34251	164.902	451.38
14QW143-10	S-type granite	299.906	2.85422	97%	Inherited	12.2376	756.03	7.3757	1376.28	4.89051	1.41296	10.8466	0.579809	3.63403	4.61553	1.00711	23.601	9.83658	124.745	46.4709	217.061	49.1271	477.329	98.114	16458.4	3.76953	397.04	2210.61
14QW143-11	S-type granite	253.451	3.09222	95%	Inherited	8.77147	1400.17	21.4313	1633.91	1.35555	8.91691	60.9463	2.90611	18.9662	15.5042	5.37601	62.3129	17.2773	169.668	58.6065	245.549	49.0991	432.6	89.0019	10254.1	0.414693	640.868	407.466
14QW143-12	S-type granite	394.021	2.5496	99%	Inherited	14.1267	286.641	3.7259	1260.17	8.59597	0.0229063	35.4639	0.097436	1.7017	3.83234	0.387175	20.3522	7.91917	101.919	42.3087	208.383	48.8969	466.078	99.0331	14669.2	3.32362	451.513	983.314
14QW143-13	S-type granite	324.18	6.3745	97%	Inherited	8.14772	436.584	11.1194	874.595	1.52996	0.111849	20.1481	0.0550388	1.32365	2.33429	0.790681	15.0889	5.88742	72.4034	30.2137	145.815	32.4803	313.759	70.2907	12805.4	0.753143	122.05	251.546
14QW143-14	S-type granite	1375.66	12.2281	93%	Inherited	24.86	590.232	11.1706	1535.29	3.19016	0.0128047	9.24661	0.116826	2.78947	5.4277	0.914311	34.0307	11.825	146.001	55.8823	252.413	53.5132	506.882	107.105	13939.5	1.99452	94.969	810.08
14QW143-15	S-type granite	1490.09	21.4048	90%	Inherited	13.9264	188.29	6.38887	246.452	1.29299	0.0429782	7.51291	0.047744	0.954515	1.54817	0.134078	6.17484	1.93014	21.2376	8.38412	39.5708	8.66544	83.3492	18.1256	12514.6	1.36437	56.6399	224.439
14QW143-16	S-type granite	268.661	2.13862	96%	Inherited	26.1911	811.049	3.23388	889.871	0.960865	1.15284	1.52474	0.17991	1.14594	1.05489	0.0838258	11.4065	6.09089	81.2175	28.1364	106.584	20.0321	165.341	30.7483	16285.7	0.93221	26.3586	769.885
14QW143-17	S-type granite	308.838	2.94649	98%	Inherited	42.0755	954.817	6.62669	2355.2	20.3139	0.0704434	14.3068	0.148034	2.10329	5.63801	0.359752	37.5471	16.5651	214.259	81.0974	379.418	81.0301	749.162	150.702	17576.4	7.10066	329.476	1809.9
14QW143-18	S-type granite	207.859	1.84605	93%	Magmatic	32.6391	649.959	17.4106	755.08	0.845273	0.00814082	1.98214	0.171126	4.37049	12.314	0.566533	54.7767	13.5045	104.222	25.6452	76.0893	11.648	81.2436	13.022	15062.4	0.509411	94.6152	693.321
14QW143-19	S-type granite	211.712	1.49163	95%	Magmatic	74.2403	1517.53	114.997	2013.08	4.93263	0.125125	0.999572	0.108983	0.777876	1.43443	0.312428	15.0192	9.33853	154.51	65.1393	290.139	56.1311	454.207	79.2268	16308.7	2.98664	18.5335	966.948
14QW143-2	S-type granite	1068.64	7.56373	77%	Inherited	42.7142	653.399	24.7914	1026.33	5.81083	0.0746258	8.48413	0.0919404	1.40035	3.96537	0.353075	22.8422	9.05948	100.335	34.5202	145.275	30.6379	293.836	60.8457	15325.3	2.38628	212.866	1292.6
14QW143-20	S-type granite	212.067	1.46146	99%	Magmatic	58.4264	1280.35	5.73375	1859.44	2.87434	0	0.708543	0.032002	1.17475	6.13815	0.612425	64.9167	28.3685	271.432	63.6203	180.324	27.7426	212.625	38.9438	16876.9	2.77076	34.6011	1978.89
14QW143-21	S-type granite	979.134	10.6086	78%	Inherited	8.53551	645.525	6.56581	3617.81	5.34959	0.174885	47.9753	1.00795	12.8824	22.1296	2.41584	110.098	33.0717	369.805	131.518	563.973	112.843	1002.13	201.746	13412.7	1.81638	375.717	452.776
14QW143-22	S-type granite	317.785	5.19758	97%	Inherited	13.9131	889.185	4.95192	1759.95	6.14671	1.02219	19.2343	0.352343	3.2274	4.31717	0.682238	27.8416	10.5907	142.678	59.6035	295.305	67.5219	672.319	144.888	14094.8	1.94026	174.137	493.55
14QW143-23	S-type granite	248.313	4.42902	80%	Inherited	4.47098	613.008	7.33215	572.896	1.13455	4.9274	46.4359	1.41245	9.48573	5.17431	1.39468	18.8097	5.08109	54.1118	19.7201	85.9327	17.8303	169.404	35.6641	12624.9	0.588691	96.8545	95.6822
14QW143-24	S-type granite	234.648	1.53368	95%	Inherited	37.6301	688.848	4.2702	1362.06	7.59128	5.75829	23.2699	1.91524	10.4213	8.5614	0.506237	32.5244	10.3384	117.076	44.1186	210.097	49.3122	512.332	113.322	17580.2	13.5722	259.545	1328.29
14QW143-25	S-type granite	340.033	2.45314	91%	Inherited	24.2026	870.212	16.1263	1371.12	2.86955	5.64595	17.6562	1.6912	5.94267	3.96489	0.240119	18.6483	7.47413	103.486	44.16	227.3	51.1754	506.402	108.779	15782.5	0.841389	108.338	947.598
14QW143-26	S-type granite	216.468	1.58558	99%	Magmatic	40.3138	846.869	7.35097	2979.22	3.77122	0.0709691	10.6603	0.82278	13.4589	24.3772	3.2193	103.695	30.0628	312.668	106.455	452.527	92.5032	824.958	162.689	13945.1	1.88192	568.763	1682.31
14QW143-27	S-type granite	1650.86	8.59667	94%	Inherited	27.5479	714.629	11.7934	1457.72	7.18785	0.374066	10.8564	0.157729	1.90251	4.63851	0.538195	29.9178	10.5491	126.788	48.9009	240.542	56.3712	593.407	132.579	15625.1	7.73567	263.285	1670.79
14QW143-28	S-type granite	246.401	2.12787	97%	Inherited	54.0108	1856.69	11.8901	5601.27	47.6807	1.60906	145.114	1.5852	13.5597	21.3377	3.04575	117.281	40.8076	496.784	194.636	899.964	178.652	1603.39	324.211	11750.6	11.7901	1210.6	1798.14
14QW143-29	S-type granite	237.517	1.95451	99%	Inherited	31.2327	675.764	7.03655	3140.02	17.2643	0.070491	19.9976	0.194733	2.64597	8.01211	1.19762	60.1386	23.0937	293.365	116.085	519.029	106.427	926.292	185.808	14978.8	5.49896	722.95	1597.6
14QW143-3	S-type granite	259.848	1.76517	98%	Inherited	29.2556	558.46	4.41804	930.343	2.83681	0.0139378	8.38044	0.0201808	0.470085	1.55461	0.271326	10.7953	5.12438	71.7601	29.7011	143.62	31.5988	304.317	63.2566	15430.9	1.926	132.013	848.034
14QW143-30	S-type granite	330.772	2.66845	92%	Inherited	25.1269	748.425	2.55829	1388.75	1.88121	0.0293298	1.80866	0.0934926	1.6316	3.90269	0.425729	26.2471	9.63251	123.399	48.6803	216.293	45.4246	418.385	88.5152	15227.6	1.32145	56.3887	593.832
14QW143-31	S-type granite	261.136	2.39265	96%	Inherited	29.9054	587.398	3.32743	1159.8	5.30245	0.0201846	18.7874	0.0288911	0.310264	1.55134	0.497529	13.8539	6.84363	93.7113	38.9331	191.521	44.3386	438.71	94.8454	16439.7	3.4704	121.508	911.002
14QW143-32	S-type granite	234.103	1.93918	98%	Inherited	41.0397	799.298	4.72802	1394.51	2.87736	0.774902	7.27262	0.386936	2.54192	4.15529	0.607217	29.1471	11.8893	136.462	46.9621	204.473	42.692	388.17	75.7536	13933.5	1.54555	148.079	1328.5
14QW143-33	S-type granite	211.648	6.38642	81%	Magmatic	21.2661	708.286	2.94552	851.85	0.62877	0.121323	0.570056	0.0679942	0.327729	1.05697	0.157126	12.8123	6.98891	85.3194	26.1444	94.599	16.8793	134.173	25.609	17113.8	0.780568	9.80965	521.484
14QW143-34	S-type granite	212.304	2.25442	93%	Magmatic	31.0912	453.847	10.4578	928.34	2.12788	0.505695	16.4945	0.111755	1.50433	2.95389	0.539031	17.4444	6.77954	80.2012	30.5368	137.217	29.2073	275.242	58.3965	15753.9	1.21347	185.884	514.361
14QW143-35	S-type granite	215.29	1.48745	99%	Magmatic	63.8989	1151.23	5.15803	2019.87	4.89961	4.97627	24.0068	1.37262	6.32279	5.24611	0.773557	37.4339	16.2701	192.53	68.3089	300.348	65.3276	591.18	113.144	17776.1	2.88232	569.753	2756.19
14QW143-36	S-type granite	205.091	2.39971	99%	Magmatic	66.1648	2465.99	6.72729	4069.77	7.67575	0.010219	1.17495	0.0769787	1.92223	12.7355	0.888841	146.085	65.6946	621.742	139.456	370.079	51.5354	359.604	61.7442	14413.4	4.60625	70.9478	3588.67
14QW143-37	S-type granite	238.582	2.0369	96%	Inherited	4.52761	461.195	4.69923	2557.89	3.11799	0.0600735	17.6796	0.411261	7.4401	13.4467	2.96159	64.7073	20.7618	238.495	89.0855	395.651	82.8194	760.547	162.914	11142.3	1.38591	628.468	715.169
14QW143-38	S-type granite	248.825	2.48283	98%	Inherited	1.89389	487.493	6.3423	1292.78	1.04337	0.00760729	15.963	0.0897749	1.25974	3.39086	1.56886	25.426	8.59568	106.58	43.6599	202.291	44.2656	428.365	95.5724	12540.3	0.471398	122.14	221.651
14QW143-39	S-type granite	247.431	1.71352	96%	Inherited	35.3906	489.106	6.89009	1063.17	3.4715	0.0469623	14.1296	0.104401	1.49438	4.31759	0.300687	22.5555	7.41276	93.3251	35.8487	164.747	36.4266	345.983	73.6537	13485.3	1.75486	220.479	1083.46
14QW143-4	S-type granite	282.396	1.85758	97%	Magmatic	36.6466	1351.52	4.9923	2494.27	19.8011	12.7213	145.438	3.48901	17.3549	9.8152	1.82629	48.5924	17.7835	215.682	85.3537	400.822	87.9448	830.437	172.39	12780.9	6.83533	1380.59	1495.45
14QW143-40	S-type granite	1837.14	11.4804	83%	Inherited	9.38854	410.133	4.0352	550.12	1.4173	0.264817	17.7847	0.144723	1.51698	2.12804	0.537855	11.1376	3.65306	43.8568	17.3066	87.3769	20.2475	206.263	48.1701	13008.8	0.795673	189.326	395.309
14QW143-41	S-type granite	827.078	23.4613	71%	Inherited	25.3972	579.451	9.67666	766.948	3.39798	1.92674	8.0098	0.76969	3.461	2.22013	0.148234	12.5859	4.77732	61.8705	24.3787	124.717	30.6094	321.675	73.0012	16538.7	1.95325	84.3528	743.826
14QW143-42	S-type granite	447.435	3.27452	98%	Inherited	23.8556	1723.84	5.25066	984.156	4.72796	0.980538	45.2171	0.939578	7.04258	7.53659	1.68392	26.6782	8.11305	89.8541	31.2532	138.441	31.0431	310.734	69.5412	13908.8	2.13304	573.458	1080.89
14QW143-43	S-type granite	333.06	2.92931	99%	Inherited	52.3747	399.711	81.2276	1591.76	10.7298	0.122619	64.4812	0.184867	2.73189	5.59582	1.06777	30.7935	10.7296	131.005	52.7876	253.834	57.0117	548.521	116.665	13596.2	4.40231	872.361	1213.2
14QW143-44	S-type granite	307.267	3.2814	98%	Inherited	9.72165	813.674	2.6961	1566.81	3.21101	0.0197132	6.22932	0.0663013	1.12332	3.30026	0.527186	21.6343	9.15276	127.001	52.0275	245.663	53.3166	519.042	111.976	15171.3	1.75798	155.109	610.05
14QW143-45	S-type granite	204.945	1.17472	99%	Magmatic	67.9882	2534.54	8.07714	4095.44	5.49641	0.00823146	1.27979	0.168721	3.20769	16.8215	1.22001	185.368	76.9022	679.981	141.128	345.794	46.3627	314.257	52.7302	14146.8	3.34516	96.5813	3195.23
14QW143-46	S-type granite	517.811	6.04483	96%	Inherited	20.4406	215.949	6.37954	331.869	0.814342	0.0121443	0.725205	0.0196699	0.531715	1.48495	0.601201	9.50118	3.14779	33.3696	11.2146	47.2233	10.1532	93.5805	19.1073	15240.4	0.490522	27.763	757.921
14QW143-47	S-type granite	521.974	3.07032	98%	Inherited	64.5574	813.238	17.8419	3896.28	28.0013	0.0610517	50.1138	0.232433	4.49974	12.8493	0.638269	82.0086	29.5599	362.657	139.461	610.137	123.417	1091.92	216.404	12438.7	14.9553	1753.34	1935.46
14QW143-48	S-type granite	304.746	4.82546	99%	Inherited	22.9856	1131.95	68.679	3767.4	16.2571	0.879929	25.6935	0.558891	5.89292	11.7488	0.754974	83.1744	32.2453	368.018	135.675	580.624	113.814	977.102	191.698	15088.5	9.5434	651.442	1661.52
14QW143-49	S-type granite	332.468	3.53247	99%	Inherited	20.3318	613.433	6.3839	1431.78	8.79107	6.7834	45.0919	2.36981	13.153	6.82408	0.549223	30.9301	10.3415	128.724	49.8358	229.986	48.7315	449.281	92.6834	13739.6	3.58289	288.412	485.031
14QW143-5	S-type granite	800.594	7.36837	86%	Inherited	47.5817	714.021	12.7111	2201.88	7.40591	0.305535	94.7219	0.321843	4.53314	8.16352	3.10706	47.6596	16.1846	196.871	75.5579	347.739	76.1294	722.202	152.736	13204.8	2.43576	922.632	1134.91
14QW143-50	S-type granite	209.227	1.81605	99%	Magmatic	62.1948	1572.18	4.33147	2066.35	1.92291	0.0414733	0.667654	0.108648	1.49158	7.75133	0.468256	69.2946	29.4577	274.228	68.3094	210.428	33.8163	255.041	45.427	14524.9	1.42783	34.834	1656.65
14QW143-51	S-type granite	612.275	5.33854	98%	Inherited	8.35616	256.631	7.97975	620.069	1.46446	0.0427427	30.3945	0.17422	2.80651	4.42915	2.15873	19.8016	5.58886	59.6474	20.8988	92.5917	18.9097	174.122	37.6862	11262.3	0.509775	120.105	201.346
14QW143-52	S-type granite	438.569	4.44296	98%	Inherited	4.65179	575.186	5.73691	1311.54	2.61367	0.00825475	15.2701	0.0971598	2.00086	4.23877	1.0958	24.9409	9.41618	116.337	45.8172	216.257	46.8772	457.269	100.801	13529.3	1.49813	170.279	377.287
14QW143-53	S-type granite	815.631	30.4371	71%	Inherited	29.4069	1228.77	21.6515	1139.57	1.49405	58.2614	131.654	15.8202	74.4925	29.8269	2.33947	61.8108	15.5265	136.405	38.8057	141.005	26.5064	228.407	44.0347	14693.4	1.09426	142.823	663.839
14QW143-54	S-type granite	354.111	3.23184	96%	Inherited	23.0256	286.873	6.79106	482.656	0.716151	0.0778923	8.42791	0.130754	1.17234	1.57715	0.615312	7.09244	2.62563	33.6956	14.6005	79.8181	20.8332	231.422	60.0352	14167.4	0.561757	141.043	436.602
14QW143-55	S-type granite	908.436	5.57209	95%	Inherited	15.3939	1144.57	3.82535	855.641	3.93636	4.90164	27.0927	2.36979	13.0226	7.74431	0.503045	21.7257	6.60319	75.7817	28.3	132.086	28.6856	271.171	58.9125	14079.2	2.40016	193.449	957.648
14QW143-56	S-type granite	1086.41	10.3949	80%	Inherited	41.1805	698.841	13.839	1112.95	6.24959	20.7951	58.7773	4.72768	16.2786	7.13779	0.15455	21.0119	8.23433	101.531	36.6931	174.172	38.4264	353.899	72.5488	15065.1	3.21144	242.703	1437.68
14QW143-57	S-type granite	298.171	3.09081	98%	Inherited	7.04742	573.449	5.60564	1919.96	2.38168	0.0254646	12.8406	0.219671	3.68725	8.0258	0.734431	44.0309	15.2032	176.927	67.8959	294.025	58.2657	509.141	103.739	11598.3	0.944764	209.839	371.084
14QW143-58	S-type granite	323.642	3.69717	87%	Inherited	13.6904	635.69	3.48615	920.589	0.912779	0.466878	3.41956	0.137128	0.810228	1.93078	0.281477	12.6562	6.0967	81.6862	28.471	122.084	24.4032	223.597	48.5	14859.4	0.768039	21.6239	360.026
14QW143-59	S-type granite	251.422	3.36423	99%	Inherited	24.6801	959.806	50.3532	1565.73	7.08181	0.172976	7.39267	0.0889741	1.71957	6.25932	0.340141	44.8723	15.4475	162.636	51.7102	220.451	45.2144	415.588	86.1363	14387.9	2.83407	155.2	858.899
14QW143-6	S-type granite	232.551	2.26149	98%	Inherited	9.99767	621.606	10.1402	4457.68	3.16619	0.0777499	25.9636	0.77189	13.0103	27.0305	4.77348	137.333	42.3628	472.35	172.128	724.758	139.106	1207.89	240.992	11523.9	1.01323	475.718	625.009
14QW143-60	S-type granite	494.743	5.78126	93%	Inherited	28.8372	547.134	7.48792	915.468	3.38154	0.115838	4.97634	0.183003	1.98952	3.07342	0.507366	17.5502	6.61156	80.8877	30.2831	137.741	30.4522	297.87	63.0033	14766.9	2.29498	141.053	941.859
14QW143-61	S-type granite	244.229	2.89888	94%	Inherited	69.2905	1099.19	4.24731	2131.57	11.3645	1.15523	15.4703	1.2781	7.54089	9.45663	1.79555	37.4246	14.698	180.756	69.2174	322.555	72.1964	684.347	142.474	15271.2	5.14356	1190.42	4140.76
14QW143-62	S-type granite	248.541	3.0924	97%	Inherited	46.6164	875.191	5.16731	948.148	1.16782	1.11294	3.16604	0.148525	1.81165	1.72764	0.207756	11.6313	6.30849	85.336	29.891	133.436	29.7364	288.569	60.0099	16070.9	1.25274	33.1648	1706.29
14QW143-63	S-type granite	1763.79	12.135	98%	Inherited	35.2507	227.679	8.08593	604.616	2.73142	0.0307023	9.41678	0.0506601	0.693673	1.99199	0.0308016	10.0191	3.91069	51.2031	19.7329	97.3202	20.7854	196.612	40.1623	16140.5	2.25643	322.644	1017.59
14QW143-64	S-type granite	276.086	4.03609	90%	Inherited	7.86796	348.937	7.01883	1594.38	4.4679	0.0854803	60.3117	0.251709	3.0994	8.09755	2.47514	40.0639	12.6391	147.791	56.8476	250.099	51.2438	460.14	99.3577	14456.1	2.0093	207.818	234.704
14QW143-65	S-type granite	802.116	6.87725	98%	Inherited	3.31512	466.294	5.19122	1898.7	2.25153	0.0204893	24.1609	0.184806	2.9853	5.92389	1.62349	33.9137	11.9618	152.762	61.8473	303.765	67.4556	659.28	144.945	11168.1	0.983826	279.158	332.989
14QW143-66	S-type granite	324.64	2.56927	97%	Inherited	3.99766	521.503	8.37819	1454.65	3.27924	0.00737556	19.9034	0.0526866	1.22397	3.06326	0.946333	19.2871	7.66433	105.207	47.0773	242.822	57.9208	592.977	135.939	11360.7	1.25445	182.718	280.873
14QW143-67	S-type granite	479.272	25.0518	54%	Inherited	40.7076	687.751	6.4567	1078.55	8.09391	0.20416	9.43506	0.234947	1.41835	2.56243	0.339496	14.4264	6.37425	84.8621	33.561	170.455	41.4125	418.305	91.3024	15254.5	5.21884	101.057	964.786
14QW143-68	S-type granite	309.66	5.85091	95%	Inherited	23.0057	880.161	3.98626	994.874	3.88181	0.266537	2.51209	0.197639	1.75029	2.1391	0.495018	12.8915	5.79246	81.1469	31.9651	157.603	38.2308	397.739	89.5386	15336.9	5.2396	46.8957	627.526
14QW143-69	S-type granite	258.768	2.28794	84%	Inherited	34.5899	1478.28	12.718	1365.58	5.53043	8.56257	15.5444	2.33796	12.1905	6.89439	1.21378	25.6353	9.70608	114.288	43.9527	223.339	54.4069	575.466	133.131	13638.5	7.24037	149.88	2584.93
14QW143-7	S-type granite	768.676	9.22898	84%	Inherited	12.3202	1439.28	10.6484	7587.89	7.85406	0.342882	282.217	2.40336	37.5181	62.8984	8.65638	279.161	82.9385	878.015	295.906	1183.18	216.834	1841.16	359.444	10090.9	1.92119	709.82	571.577
14QW143-70	S-type granite	219.01	2.31744	95%	Inherited	5.61041	273.836	4.18807	841.181	1.51985	0.0258496	8.4738	0.0772894	1.22119	2.78932	0.577539	18.0093	6.09541	72.8396	28.8098	132.57	28.2246	259.946	56.9784	12899.5	0.774549	104.498	192.794
14QW143-71	S-type granite	254.044	2.18649	98%	Inherited	23.88	379.842	10.0556	1285.13	8.56254	0.0438864	43.7443	0.0792234	1.79823	3.55865	0.677884	20.4455	8.12879	104.194	42.407	209.162	46.9912	458.289	98.6411	12280.1	4.16315	466.418	677.511
14QW143-72	S-type granite	393.929	7.1332	96%	Inherited	3.54958	697.487	8.64299	1174.51	1.4648	0.561695	7.63504	0.56384	4.44502	7.1777	0.794091	32.5181	10.1137	112.957	42.4623	177.826	34.4943	290.607	59.8874	10696.9	0.749112	64.5868	154.186
14QW143-73	S-type granite	1639.73	22.596	99%	Inherited	0.527979	184.913	10.8261	829.167	2.10038	0.00723027	11.582	0.101305	2.03184	4.32694	0.215758	21.3295	6.78194	78.2638	28.5301	124.853	25.6133	226.152	46.169	12102.4	0.638081	43.3975	54.4399
14QW143-74	S-type granite	2548.62	15.8022	98%	Inherited	1.51263	224.079	7.40878	386.297	1.20839	0.0138346	13.1131	0.0546187	0.941057	1.79485	0.159174	8.12576	2.59141	32.4007	12.4721	60.5497	13.204	127.667	29.3112	11352	0.49812	72.1198	117.581
14QW143-8	S-type granite	222.78	2.00332	99%	Inherited	25.1744	745.701	6.93178	1529.31	1.18696	0.0161996	13.2388	0.200563	2.7916	5.27828	1.60682	30.1455	11.0744	137.351	52.6601	246.426	56.3766	566.328	123.022	15056.7	0.698788	83.2634	565.706
14QW143-9	S-type granite	1358.23	12.2954	99%	Inherited	21.9515	202.771	7.52128	354.015	1.91418	0.0154987	11.9629	0.0539605	0.602146	1.06231	0.287759	6.36848	2.31074	30.9402	12.2426	58.2251	12.6839	120.329	25.8249	13258.4	1.03209	28.3351	75.5427
14QW145-1	S-type granite	607.717	4.36866	97%	Inherited	13.2237	340.182	8.44022	2417.1	3.25241	0.0761769	52.389	0.624551	8.76701	14.4128	1.08282	71.0612	21.6316	237.159	82.1032	344.971	65.7706	565.73	109.013	13278.4	1.48306	468.552	544.322
14QW145-10	S-type granite	210.314	1.79517	95%	Magmatic	24.235	392.382	1.9158	1094.35	1.70758	0.398439	5.91558	0.256921	2.96218	4.52064	0.37717	26.6296	9.07211	103.29	37.8133	162.209	32.2551	281.838	58.9518	13357.9	1.278	140.017	552.857
14QW145-11	S-type granite	260.371	2.07228	84%	Inherited	50.3552	695.98	2.67959	2413.71	7.23557	1.92884	14.3691	0.804317	5.84229	10.5489	5.06953	63.8552	20.2854	229.677	82.9869	361.586	73.6373	632.415	123.605	14362.6	2.46468	335.884	1103.63
14QW145-12	S-type granite	222.023	1.88449	98%	Inherited	43.8922	472.638	8.01143	344.339	1.39176	0.0122547	0.832211	0.0520553	1.04626	3.96068	0.550625	30.893	9.11464	61.4284	11.4029	30.605	5.00428	39.7038	7.98673	13125.3	0.948581	28.6116	635.39
14QW145-13	S-type granite	417.425	4.0828	88%	Inherited	23.9486	892.644	9.44628	1504.55	1.2782	0.0343501	1.09339	0.0716484	1.39767	3.98033	0.14323	26.5205	10.1768	124.846	50.9195	239.26	54.2405	529.844	120.25	14419.7	0.794917	59.5342	449.127
14QW145-14	S-type granite	233.567	1.78891	99%	Inherited	81.9375	603.42	4.67165	1062.52	3.25126	0.0258344	1.91261	0.0195938	0.974742	3.3808	0.160324	24.9525	10.4467	109.81	34.7547	138.436	27.2777	237.893	46.6016	16956.8	2.28461	79.7848	3154.62
14QW145-15	S-type granite	400.633	2.96889	99%	Inherited	23.8986	332.998	6.2738	802.335	2.30081	0	4.90415	0.0443048	1.12766	2.49134	0.117307	14.9997	5.23151	66.5113	26.5694	125.321	27.8127	272.351	58.2729	12803.7	1.09397	113.34	475.613
14QW145-16	S-type granite	234.221	2.72651	99%	Inherited	11.5419	297.805	3.83014	767.503	0.598516	0.0419847	4.13091	0.0850254	1.65541	2.92024	0.511183	17.0461	6.12704	69.9307	24.9129	109.414	22.7671	208.002	44.3462	11577.8	0.393163	84.0346	261.739
14QW145-17	S-type granite	403.126	3.58235	98%	Inherited	41.5188	1669.48	14.9694	2959.43	2.55157	0.203779	2.78839	0.380169	3.69495	8.9663	2.6669	47.884	20.1617	255.535	99.0874	456.391	96.7331	889.112	180.409	12639.6	1.41873	87.9696	476.881
14QW145-18	S-type granite	589.021	6.96337	96%	Inherited	5.42174	292.934	7.6376	613.537	3.25061	0.051247	4.896	0.168366	2.19921	2.98388	0.3709	11.464	3.99568	49.2305	20.2203	105.814	26.4938	269.221	61.7417	7666.83	0.838264	54.6367	97.5933
14QW145-19	S-type granite	505.749	3.83121	99%	Inherited	21.0786	475.887	4.47232	1842.73	13.1909	0.0791018	62.3908	0.189131	2.30961	6.30025	1.13103	36.1416	13.0676	157.953	61.094	279.122	59.0874	545.329	113.795	12791.9	3.42163	880.183	583.735
14QW145-2	S-type granite	418.339	6.62157	88%	Inherited	42.4011	345.643	25.7887	796.586	3.9139	0.195263	22.68	0.304725	3.06616	4.9207	1.59264	22.7448	6.96389	73.0322	25.4874	113.078	24.115	218.166	47.4471	12487.6	1.44998	202.126	708.588
14QW145-20	S-type granite	1707.97	14.6681	90%	Inherited	6.89883	323.71	11.7442	561.263	2.0877	0.00554946	4.41793	0.0546895	1.12098	2.29592	0.0874035	12.1294	4.19982	50.5079	19.0922	87.3328	18.3822	172.527	36.3658	11340.4	1.05586	53.2296	113.154
14QW145-21	S-type granite	209.44	1.60846	93%	Magmatic	72.4878	849.371	12.0732	1290.15	2.38179	0.0311757	2.65947	0.192995	3.50637	9.74902	1.15334	60.9603	18.5494	158.15	41.7102	137.576	23.5543	179.744	33.0144	13483.6	0.877436	109.128	1163.01
14QW145-22	S-type granite	209.571	1.81969	97%	Magmatic	74.8574	567.275	10.3064	756.184	1.70244	0.0144383	1.83307	0.131304	2.35052	7.62534	0.628798	40.8713	11.5395	96.2394	24.9348	82.095	13.7038	104.342	18.8746	14080	1.02705	118.162	2191.16
14QW145-23	S-type granite	206.66	1.50802	96%	Magmatic	156.725	468.812	0.526458	701.749	1.45663	0	0.117982	0.0649233	0.00495928	0.881539	0.113343	11.5727	5.67929	65.9716	20.742	89.4554	19.5328	188.016	35.7106	18642.6	1.87148	18.7459	3852.41
14QW145-24	S-type granite	208.649	1.5721	98%	Magmatic	50.3934	835.021	7.99606	1114.23	0.681774	0.00274794	1.671	0.210051	3.35138	11.5293	0.794749	64.0123	16.8183	137.885	37.3432	134.045	24.0074	198.193	38.6531	13144.9	0.36292	104.55	859.112
14QW145-25	S-type granite	209.979	1.78163	99%	Magmatic	95.8927	432.635	1.60167	320.828	0.68183	0.00246585	0.0722781	0.00387518	0.0794802	0.184259	0.0219981	3.31395	1.83458	24.0161	9.17084	44.2699	11.4513	122.356	25.3285	18296.7	0.911905	3.53812	1952.73
14QW145-26	S-type granite	207.949	1.63297	99%	Magmatic	25.6983	515.734	7.09192	716.042	0.764349	0.00513152	1.85405	0.13219	2.75703	9.24575	0.537175	44.2767	11.1266	91.0111	23.9953	84.896	14.8292	123.271	23.598	14036.6	0.438844	97.8788	558.919
14QW145-27	S-type granite	235.115	2.93998	98%	Inherited	38.6476	598.965	3.79007	621.514	0.946919	0.0145307	0.926393	0.103482	1.98726	6.53885	0.30427	38.6039	10.5564	82.8753	19.7009	66.9294	11.5472	99.2575	19.3719	16761.2	0.730101	72.2309	1025.2
14QW145-28	S-type granite	211.003	1.8839	98%	Magmatic	101.751	1032.83	18.4237	1735.46	2.12199	0.0628668	3.3778	0.441168	7.85548	21.7434	1.15812	109.762	28.9996	234.701	58.1877	188.654	30.0706	227.855	40.1523	12932.7	0.722029	269.953	1703.15
14QW145-29	S-type granite	210.897	1.85469	97%	Magmatic	74.0878	615.346	14.821	684.479	1.48547	0.0695665	1.27706	0.124072	1.23291	4.04054	0.493776	27.5488	9.1554	85.9155	22.5155	78.0391	13.8017	113.29	20.7439	14811.7	1.00069	62.7262	960.974
14QW145-3	S-type granite	228.875	1.92239	98%	Inherited	39.5499	366.143	5.84823	649.146	2.46489	0.0301969	2.51383	0.0320888	0.482428	1.49962	0.211099	12.1349	5.01574	57.4316	20.4546	90.7111	19.6588	191.228	40.7345	14610.6	1.62378	80.6111	806.414
14QW145-30	S-type granite	321.92	6.19315	90%	Inherited	26.3236	535.914	6.10954	1204.42	6.14424	0.029553	12.6505	0.112073	2.30978	3.95971	1.47658	25.4275	9.57017	113.259	40.5519	185.305	43.2941	424.368	88.2173	13451.8	5.32763	186.756	868.541
14QW145-31	S-type granite	992.563	9.93902	99%	Inherited	21.5326	987.343	14.3713	1814.97	1.40663	0.0238973	3.89034	0.142202	3.57791	6.44025	0.509734	40.0175	14.8546	175.59	65.3839	280.59	56.0521	486.287	95.5485	11787.4	0.716785	133.326	292.2
14QW145-32	S-type granite	1247.55	8.79429	98%	Inherited	5.69332	508.254	7.57846	1409.8	4.19789	0.00481823	61.2368	0.110811	2.11377	5.38499	1.67728	30.2621	10.3024	124.285	48.8187	220.393	45.5413	417.941	85.4633	12786.4	1.54456	327.114	305.625
14QW145-33	S-type granite	209.793	1.78763	96%	Magmatic	68.5445	701.217	5.39893	901.987	1.60076	0.0601781	2.05479	0.0987349	1.46988	5.46452	0.410116	35.9679	12.6237	116.729	29.3835	95.4717	16.1944	126.754	23.4738	14779.5	0.983988	54.963	968.191
14QW145-34	S-type granite	253.838	4.11639	90%	Inherited	30.8297	728.195	10.7453	1421.18	2.37649	0.770091	5.2497	0.231633	3.58719	9.25282	0.789938	57.5971	17.0813	163.692	48.7342	189.141	35.5246	293.993	59.4698	12391.6	1.00597	142.154	872.518
14QW145-35	S-type granite	209.396	1.69556	98%	Magmatic	22.0931	354.485	3.71901	1003.5	4.20391	0.00514783	5.06786	0.0389774	0.960217	3.05351	0.21817	22.3161	8.66103	93.9134	34.464	148.662	30.2822	266.751	52.6658	11923	4.14245	115.447	710.921
14QW145-36	S-type granite	320.266	5.03986	97%	Inherited	20.9921	321.766	3.63797	537.713	1.86319	0	6.75847	0.0084901	0.261955	0.832105	0.101747	5.69835	2.90803	38.8065	17.0698	84.4331	19.0555	193.05	42.7672	13942	1.90319	44.7261	526.749
14QW145-37	S-type granite	210.315	1.83599	90%	Magmatic	53.8972	553.439	31.1718	732.309	4.50736	0.478027	4.40161	0.630527	6.39067	12.1641	3.06928	57.3361	15.8807	114.22	23.1629	66.1976	10.7877	76.4885	13.1632	14582.2	0.982485	70.0042	595.029
14QW145-38	S-type granite	794.826	8.12356	97%	Inherited	8.56322	654.2	6.6981	1723.98	2.84813	0.010935	23.1105	0.140703	2.98703	6.23919	2.697	37.3742	12.1548	145.183	55.0562	250.877	55.0206	523.04	116.277	10516.6	0.960919	218.157	422.753
14QW145-39	S-type granite	221.159	2.91723	91%	Inherited	5.49947	474.592	13.7042	1050.37	1.83096	0.0147993	3.0545	0.0777263	1.31269	3.7705	0.304457	21.0572	7.42207	92.0892	35.5794	162.272	34.7719	318.914	69.8546	11042.3	0.933178	60.8037	160.405
14QW145-4	S-type granite	442.185	5.38458	93%	Inherited	13.4912	408.188	8.53607	1124.23	1.32497	0.0587334	36.8277	0.415836	8.0782	9.93378	1.09542	37.7902	10.6796	112.147	39.4166	166.527	33.3138	299.927	64.7404	10172	0.797399	122.439	216.86
14QW145-40	S-type granite	208.225	1.46754	99%	Magmatic	147.254	461.111	2.63387	804.631	2.13781	0.302986	0.974866	0.0690124	0.45731	1.0636	0.169973	8.83049	4.96194	66.6589	22.9169	107.1	25.7923	266.892	53.3802	20968	3.28759	15.9278	3975.29
14QW145-41	S-type granite	208.953	1.73858	98%	Magmatic	34.0535	775.998	10.3279	1017.58	0.993255	0.00870861	1.69088	0.144986	3.2027	10.0932	0.538791	55.7348	14.8676	124.92	33.0373	116.82	20.6003	171.536	32.4898	13430	0.505588	97.2668	823.854
14QW145-43	S-type granite	209.293	1.85209	99%	Magmatic	99.3504	1141.42	16.9802	1666.09	1.78255	0.220448	5.38255	0.716132	10.9447	26.388	2.70071	114.373	27.7853	216.31	56.141	193.149	32.8733	257.326	49.1757	11741.8	0.639214	336.204	1507.55
14QW145-45	S-type granite	204.537	2.66424	99%	Magmatic	19.2315	536.905	12.3795	481.367	0.41418	0	1.5972	0.182626	3.89657	10.1133	0.649029	39.2666	9.14614	65.7935	16.0442	49.0113	8.40343	61.254	10.6616	12203.9	0.361927	92.7192	474.142
14QW145-46	S-type granite	206.385	2.02434	90%	Magmatic	85.7716	856.986	90.3844	1586.98	4.23921	0.355796	5.61467	0.678792	8.72426	21.0601	2.86291	96.2025	28.1087	216.581	51.799	160.396	27.9961	214.27	38.8641	12219.1	0.899052	179.831	1276.58
14QW145-47	S-type granite	208.143	1.88751	97%	Magmatic	21.1461	504.541	8.16907	571.484	0.619746	0	1.20793	0.0534724	1.06431	4.85072	0.311209	29.3292	8.62992	72.3467	18.8552	63.2657	11.7365	97.717	19.4328	15162.1	0.33475	53.3335	450.504
14QW145-48	S-type granite	231.315	2.17839	93%	Inherited	15.3294	388.444	2.61096	501.483	1.73609	0.00501969	1.89314	0.0189832	0.446009	2.57145	0.19508	16.6248	5.65328	55.1942	16.2056	60.9944	11.158	99.0079	19.9733	12750.4	1.38368	44.9785	586.097
14QW145-49	S-type granite	209.154	2.07899	99%	Magmatic	27.667	651.988	4.91777	837.438	1.13251	0	1.80151	0.0759545	1.37157	5.44787	0.33236	32.9609	9.46105	91.7848	27.6345	104.9	20.2501	167.189	32.6677	14553.6	0.586721	75.9765	450.69
14QW145-5	S-type granite	207.528	1.47373	94%	Magmatic	31.7729	427.197	3.94	1248.3	5.49627	0.00309111	5.78811	0.0455847	0.891684	3.40378	0.169541	25.6817	9.638	113.044	42.7469	191.765	39.7454	361.11	73.9489	11689.9	4.94797	128.82	752.813
14QW145-50	S-type granite	208.242	1.86283	99%	Magmatic	35.8101	921.848	13.743	1309.78	1.13002	0.014314	2.65881	0.322514	6.6665	17.8653	1.21236	89.0061	22.3726	174.51	43.7478	143.63	24.399	185.937	35.0138	12387	0.477724	204.675	1162.98
14QW145-52	S-type granite	207.742	2.31524	98%	Magmatic	83.5951	455.033	7.47277	443.956	0.394458	0.008805	1.23758	0.0965307	1.50617	5.76966	0.353138	28.9198	7.62515	58.349	14.3014	47.7804	8.11999	66.037	12.9066	14251.8	0.189399	55.8797	402.531
14QW145-53	S-type granite	208.967	2.12883	96%	Magmatic	28.5576	885.915	13.0208	827.661	0.505703	0.00466387	1.81084	0.172777	3.87509	13.3626	0.679552	68.8725	16.7065	118.413	27.5678	87.2012	14.1527	112.327	20.6286	12017	0.218672	117.266	707.905
14QW145-6	S-type granite	610.783	3.67815	86%	Inherited	41.7487	583.088	14.4183	1334.4	4.05881	2.86942	34.3834	1.16151	8.16614	9.42727	3.23198	34.7125	11.8683	124.086	41.6231	178.147	36.9398	339.562	69.4728	12346.4	1.37971	213.251	801.12
14QW145-7	S-type granite	209.249	1.64962	97%	Magmatic	65.8568	815.537	4.64459	1704	2.7573	0.00507844	6.87807	0.0732218	1.46502	4.91769	0.246511	39.0345	16.5297	175.757	53.9976	203.319	37.4373	309.936	55.1057	15257.5	1.968	188.433	2331.55
14QW145-8	S-type granite	210.026	1.94733	99%	Magmatic	40.1006	470.649	2.98674	506.945	1.30788	0.00764749	0.464626	0.0154727	0.459354	1.87653	0.378687	19.8227	8.01672	72.4436	15.7011	45.0531	7.21133	58.8348	10.4354	13643	1.39769	19.7613	589.463
14QW145-9	S-type granite	423.792	18.9447	92%	Inherited	16.7013	386.96	8.97168	611.984	1.45417	0.0101628	18.6104	0.06582	1.09858	3.06146	0.470264	15.7352	5.2464	58.9969	19.0605	79.2938	15.4355	138.529	28.4319	13851.1	0.714233	83.6187	230.203
BLS-10-A1	S-type granite	2115.78	15.0989	92%	Inherited	12.6649	688.452	4.30603	1108.38	5.52785	5.80332	39.958	2.02659	8.02652	5.47209	0.341689	24.1248	8.76125	97.7523	39.0537	179.544	38.3659	344.13	74.1149	13449.2	2.51163	245.938	470.765
BLS-10-A10	S-type granite	325.518	6.22148	98%	Inherited	23.274	1125.12	7.12697	2729.51	5.55526	0.599713	18.0798	0.698898	7.06921	12.7297	2.95505	65.9404	23.8162	268.082	94.0565	406.998	85.3851	777.674	153.616	15870.8	3.94909	354.599	2049.08
BLS-10-A11	S-type granite	209.416	1.55922	98%	Magmatic	120.136	501.355	2.23237	740.164	1.54574	4.57318	14.6958	1.31132	5.58357	2.6816	0.301921	11.6417	5.22234	64.7261	23.4607	112.703	27.9882	307.69	63.9817	20702.8	5.54307	38.6863	3773.04
BLS-10-A12	S-type granite	205.664	1.42775	98%	Magmatic	118.506	417.921	1.01952	582.878	1.37619	0.00588858	0.0607207	0.00447677	0.0521402	0.641476	0.111019	6.09482	3.06697	46.59	17.2048	89.8735	23.7722	276.434	60.6538	21532	6.01386	15.5447	3875.38
BLS-10-A13	S-type granite	211.428	2.5335	99%	Magmatic	117.103	822.802	7.37779	1700.09	3.28692	0.0362398	11.3904	0.0871834	1.49612	3.53831	0.664908	32.8395	14.2	163.547	55.5891	246.349	54.1337	514.504	100.647	19380.7	3.46113	142.122	3167.19
BLS-10-A14	S-type granite	428.046	5.31182	98%	Inherited	57.4174	291.214	4.57999	1067.12	1.66326	0.00792135	19.732	0.0785238	1.17035	3.45092	0.598762	19.639	7.50584	91.122	34.6977	166.022	37.3217	372.145	85.7745	17373	1.40934	339.381	1441.45
BLS-10-A15	S-type granite	203.924	1.66636	96%	Magmatic	72.2181	1531.35	17.7174	2603.13	2.54728	0.0536914	1.96152	0.155335	2.94316	15.1085	0.707137	110.759	34.8983	321.005	88.5874	322.893	58.9504	484.274	90.3119	13360.3	1.23907	169.62	1543.22
BLS-10-A16	S-type granite	211.658	2.53107	97%	Magmatic	119.38	1848.58	13.3033	4213.56	6.5832	21.0264	52.0119	4.83422	22.9567	22.735	1.30424	139.186	47.7454	483.215	144.531	547.468	102.508	856.28	158.476	15991.3	3.22158	359.425	3645.91
BLS-10-A17	S-type granite	503.894	12.045	50%	Inherited	18.9981	382.489	31.9094	800.51	6.35135	0.118218	13.6976	0.108092	1.73625	3.88928	0.21254	16.6697	5.82043	71.0833	28.0233	132.685	29.7845	293.747	62.236	12450.8	2.06311	40.6909	185.112
BLS-10-A18	S-type granite	215.02	2.75875	96%	Magmatic	171.648	1257.07	33.3274	2168.75	9.46541	0.966474	3.50202	0.50415	4.51285	9.38415	0.771227	63.1359	23.4317	246.167	80.2684	360.447	85.5733	876.242	184.247	24965.3	14.5026	153.491	3972.39
BLS-10-A19	S-type granite	207.967	1.91357	97%	Magmatic	80.592	1092.51	9.83925	2059.2	7.30034	2.05712	16.5524	0.948489	4.8958	6.26689	0.820832	40.1422	15.6681	189.303	69.6157	317.65	70.2264	660.116	134.791	17113	4.44338	196.847	2018.61
BLS-10-A2	S-type granite	217.021	2.85995	79%	Magmatic	167.095	820.955	4.87304	1092.72	1.49537	37.2867	99.9472	11.0299	45.7784	19.0968	4.08059	31.6937	10.5413	109.392	35.1837	152.393	35.7222	359.521	68.8735	26067.7	2.89248	208.963	5163.29
BLS-10-A20	S-type granite	241.742	1.61777	99%	Inherited	76.8675	1412.28	13.4155	3787.52	5.78383	0.0589537	11.0147	0.230903	4.71879	10.728	0.812964	72.8072	27.8383	349.43	134.878	604.265	125.695	1112.76	216.059	12868.9	3.68209	485.949	1321.74
BLS-10-A21	S-type granite	441.274	4.10511	99%	Inherited	40.2224	414.692	3.24677	1819.33	2.35796	0.255229	7.29469	0.277045	3.77404	8.57614	0.97697	44.8118	15.0231	166.748	59.859	258.826	54.793	513.935	110.453	15396.3	1.09673	345.578	1226.13
BLS-10-A22	S-type granite	204.533	1.85257	99%	Magmatic	112.824	1318.24	7.98697	2920.28	4.53873	0.208457	19.2817	0.338679	3.70232	12.9183	0.664044	91.9221	31.5369	316.559	99.7849	398.176	77.9994	693.742	134.967	18193.4	2.80299	276.523	3033.54
BLS-10-A23	S-type granite	212.655	1.99275	99%	Magmatic	88.0435	1520.07	16.6412	2507.31	2.78464	0.0154548	2.29846	0.245851	5.21078	18.1745	0.651549	123.247	35.846	313.784	86.6135	305.629	54.1919	449.164	85.1526	14039	1.45494	211.723	1842.22
BLS-10-A24	S-type granite	795.728	37.5206	70%	Inherited	58.3965	618.13	11.6926	1840.36	2.76118	0.115139	9.42538	0.431197	6.52806	10.5188	0.689045	53.664	17.8844	190.781	63.6078	256.255	49.7721	426.21	82.1295	13090.6	1.66825	257.698	1579.56
BLS-10-A25	S-type granite	197.672	1.53204	97%	Magmatic	115.733	1408.88	11.7873	2578.8	3.30798	0.00525351	1.94292	0.28213	6.14123	16.7824	0.731365	108.755	33.8169	308.708	85.668	321.754	60.4185	501.226	93.4285	17701.5	2.89533	199.43	3024.43
BLS-10-A26	S-type granite	1135.73	15.805	96%	Inherited	23.2291	457.398	10.3312	1261.77	2.00058	0.0127754	18.3299	0.0891554	2.10192	4.84279	0.874259	25.7161	9.15724	107.426	42.0571	189.564	40.6059	374.504	80.1771	12634.8	1.46469	364.912	723.2
BLS-10-A27	S-type granite	207.591	1.59427	97%	Magmatic	35.2818	684.989	6.57903	1034.61	1.75271	0.0108005	1.51233	0.0428791	1.04281	4.8758	0.425944	35.3044	12.813	121.507	33.5363	120.735	21.8499	182.551	34.6141	14584.3	1.37658	53.0443	711.835
BLS-10-A28	S-type granite	186.414	1.06246	95%	Magmatic	122.636	1799.21	7.17922	3611.49	3.43392	0.0594544	1.31339	0.132203	2.49087	11.8075	0.401896	91.0863	36.3232	391.66	120.268	465.829	87.945	711.861	123.081	18937.8	2.17922	212.652	3790.09
BLS-10-A29	S-type granite	233.106	1.68452	73%	Inherited	59.5528	1176.29	12.9688	3445.56	14.9493	0.404587	49.7314	0.315995	4.18663	8.89203	1.88317	59.8712	22.8278	293.507	116.289	538.711	115.512	1081.39	226.458	13255.6	4.42613	1328.7	1420.57
BLS-10-A3	S-type granite	216.16	1.44644	93%	Magmatic	35.8399	596.884	12.1159	676.835	0.620981	0.0105262	1.56963	0.148082	3.28285	11.5645	0.346799	53.5959	13.4743	100.182	23.2365	72.9198	11.8096	87.6556	14.9422	15091.9	0.338677	102.181	763.416
BLS-10-A30	S-type granite	207.672	1.92443	97%	Magmatic	85.488	1651.89	15.4559	2469.01	2.23636	0.018248	1.62468	0.216029	4.94428	21.8781	0.532527	138.941	41.5556	333.083	82.3891	263.79	44.3106	351.493	54.078	15233.1	1.21558	214.049	2175.51
BLS-10-A31	S-type granite	1488.97	8.71183	92%	Inherited	41.6623	959.456	11.1896	2734.73	5.26893	5.50774	71.2517	3.35065	22.8981	21.711	5.75255	77.2943	24.2673	266.951	94.8602	419.096	86.1085	780.912	161.784	12627.2	2.26881	625.655	650.296
BLS-10-A32	S-type granite	251.603	3.39014	82%	Inherited	0.342884	166.705	11.7139	990.464	11.7693	0.0593306	13.5332	0.125833	2.10962	4.64642	0.39395	24.9679	8.63358	101.304	36.7624	152.463	29.7102	247.864	46.1918	9577.7	4.43486	44.9141	93.2806
BLS-10-A33	S-type granite	194.677	1.35272	93%	Magmatic	164.769	2031.49	5.51384	4090.99	3.98307	3.01961	3.70732	0.697435	6.45364	14.5694	0.718063	108.168	42.3434	445.819	135.952	520.885	96.34	785.001	136.603	17811.8	2.50284	317.543	4272
BLS-10-A34	S-type granite	192.508	1.63268	97%	Magmatic	104.788	2326.13	27.5183	3834.64	2.22064	9.10095	23.7728	2.24123	15.0464	29.6591	1.22445	166.769	51.6914	461.321	128.313	475.829	88.419	728.114	138.87	12944	1.22568	265.242	2300.21
BLS-10-A35	S-type granite	181.346	0.938241	96%	Magmatic	158.936	3513.41	17.1606	7267.82	3.90428	0.146352	2.95405	0.444928	9.47705	42.4116	1.00264	283.145	95.5148	866.738	247.167	899.284	158.839	1256.53	225.738	13935.2	1.97128	445.761	4783.26
BLS-10-A36	S-type granite	206.661	1.82342	96%	Magmatic	78.9435	1334.95	47.9038	2005.95	2.24135	0.253808	2.08332	0.248825	3.74489	12.2021	0.372438	83.9915	27.5623	244.902	66.5217	247.658	45.2663	373.776	68.4031	11726.8	0.925188	123.963	1223.79
BLS-10-A37	S-type granite	207.783	1.87739	97%	Magmatic	75.575	1506.55	21.1561	2065.06	1.64118	0.0425704	1.35234	0.136405	3.12404	13.5924	0.334728	83.2501	27.4558	244.864	68.162	256.709	47.1393	386.314	71.1566	12072.4	1.02619	127.277	1326.21
BLS-10-A4	S-type granite	210.292	1.81451	93%	Magmatic	125.365	1023.8	10.1693	1637.74	3.08957	0.0929476	1.56366	0.0708448	0.670248	2.69812	0.225651	27.8394	13.6119	160.497	52.9414	230.76	48.4762	422.423	79.23	18542.2	3.22589	85.1302	2958.5
BLS-10-A5	S-type granite	205.809	1.62024	93%	Magmatic	24.3735	513.384	6.21102	903.055	2.19364	0	2.59047	0.0636577	1.43873	6.84252	0.41651	41.6312	13.0616	113.879	31.4005	114.361	21.5481	186.551	36.2371	15124.7	1.86897	113.768	577.338
BLS-10-A6	S-type granite	254.361	1.87642	99%	Inherited	50.6056	3991.18	4.83464	2447.55	21.3256	99.5159	256.644	26.6264	116.98	29.6764	1.66521	55.8049	16.8627	203.907	83.7647	404.734	89.4855	841.666	174.513	16318.4	10.46	700.217	1472.04
BLS-10-A7	S-type granite	207.292	1.66249	96%	Magmatic	153.413	730.854	4.82148	1127.35	2.32321	0.4265	8.33004	0.343865	2.67542	3.54355	0.583048	21.1414	9.38676	108.437	37.3451	161.474	36.81	353.013	68.722	21900.9	3.68077	65.2697	3652.66
BLS-10-A8	S-type granite	297.057	3.61077	97%	Inherited	28.4265	732.146	2.52815	1283.57	1.57291	2.98424	13.1203	1.01152	7.23551	5.46186	0.277354	25.6261	9.76052	119.636	46.0889	210.181	45.0286	422.216	88.2342	14348.3	1.16837	112.813	695.911
BLS-10-A9	S-type granite	802.047	13.0101	99%	Inherited	22.2625	1055.39	6.72134	2052.06	1.91227	0.00558502	1.75463	0.0511147	0.721387	2.84359	0.198863	29.2617	13.3291	183.971	71.4387	322.706	68.101	624.025	128.218	16786.4	1.34809	69.1889	498.896
BLS17-41-A1	Li-poor pegmatite	276.032	2.03718	96%	Inherited	28.3441	427.032	2.3987	1737.75	13.1229	0.00645362	33.5074	0.141949	2.42942	6.27659	0.0829435	36.0369	12.6386	153.937	58.2701	262.058	55.2859	519.313	104.479	12741.2	4.21336	612.003	1510.26
BLS17-41-A10	Li-poor pegmatite	305.006	6.92111	75%	Inherited	28.1059	1221.9	19.3922	2004.74	2.13213	25.4826	69.1302	8.84431	50.3685	32.8611	5.56723	71.0219	21.9318	216.071	59.5463	219.637	44.1357	379.277	66.4388	18408.9	1.65888	84.1807	2512.94
BLS17-41-A11	Li-poor pegmatite	209.733	1.58879	96%	Magmatic	106.492	1945.88	8.45178	3367.65	4.59258	0.0984422	1.82172	0.594194	8.24869	24.171	1.82272	105.853	38.8207	374.258	110.253	426.475	81.9791	714.029	130.193	15921	3.77466	67.1224	3165.76
BLS17-41-A12	Li-poor pegmatite	209.058	1.63142	99%	Magmatic	94.8036	1089.44	10.2012	1573.33	0.94462	0.00348981	1.15368	0.116387	3.53231	11.7009	0.343847	70.2319	21.21	185.724	52.1808	187.179	33.3131	275.794	50.7076	13015.7	0.854116	75.0827	687.108
BLS17-41-A13	Li-poor pegmatite	209.004	1.52575	97%	Magmatic	44.8441	1348.38	2.53991	1573.67	0.883952	0.00245788	0.235448	0.00821869	0.378525	2.8182	0.299141	35.1514	17.4018	187.929	49.1491	154.49	25.1737	194.038	35.0622	14683.3	0.860303	17.9846	1137.45
BLS17-41-A14	Li-poor pegmatite	209.52	1.44776	98%	Magmatic	38.5401	1138.83	3.27863	1491.74	0.821155	0.00346474	0.393722	0.0288851	0.685945	3.72439	0.27174	35.6093	16.0725	178.265	47.9855	153.925	25.7115	195.456	34.3259	14605.8	0.819254	25.2159	1026.12
BLS17-41-A15	Li-poor pegmatite	210.658	2.05711	99%	Magmatic	67.823	835.23	4.03113	1772.73	6.56764	0.0970441	19.8637	0.0858042	1.9126	3.49792	0.509655	26.6223	11.9013	152.865	56.3063	252.411	55.6767	549.607	101.989	16069.3	2.61556	562.025	2706.09
BLS17-41-A16	Li-poor pegmatite	416.918	3.945	98%	Inherited	6.57042	1074.38	6.43194	4093.78	8.61371	0.0104261	30.0422	0.273911	4.5003	12.293	2.08444	86.1892	30.9996	375.3	141.954	608.512	121.1	1057.44	205.23	11603.6	2.31864	808.425	1152.35
BLS17-41-A18	Li-poor pegmatite	156.904	1.4653	92%	Magmatic	1.46612	482.246	28.1161	1625.16	6.08273	0.764977	25.4349	1.33502	12.4986	15.1074	5.15423	50.8666	16.0646	159.755	53.0333	214.551	44.2271	384.077	71.6266	12036.5	2.30361	550.864	764.988
BLS17-41-A19	Li-poor pegmatite	421.358	9.06154	83%	Inherited	14.9673	708.697	9.75427	805.146	1.3697	0.0328331	1.31817	0.115595	1.05802	2.11724	1.3742	11.6046	4.67398	62.9896	26.4932	134.732	34.82	389.778	92.2249	10985.8	1.02052	36.1888	480.555
BLS17-41-A2	Li-poor pegmatite	208.132	2.41758	96%	Magmatic	24.0167	772.173	2.16146	1155.92	0.750054	0.0113989	1.90244	0.0259356	0.418836	1.82569	0.242388	17.1702	8.12297	109.29	35.3364	135.421	26.01	234.425	46.6944	14975.2	0.605557	15.5674	548.733
BLS17-41-A20	Li-poor pegmatite	211.728	1.47947	98%	Magmatic	65.139	1901.17	2.42014	2694.98	1.31934	0.00520333	0.244323	0.0295667	0.525939	4.11508	0.271301	43.3841	22.645	267.615	83.994	313.005	60.0202	507.935	96.1388	15646.9	1.23508	25.8965	2054.02
BLS17-41-A21	Li-poor pegmatite	206.801	1.6857	99%	Magmatic	35.8685	1266.5	15.6576	1797.75	1.88654	0.00450983	1.52892	0.126416	3.09137	11.9813	0.346166	71.1333	22.1734	203.567	58.0868	219.184	40.7162	334.878	62.5798	12513.3	1.09864	83.4471	815.146
BLS17-41-A22	Li-poor pegmatite	213.014	1.81496	99%	Magmatic	52.0475	764.775	1.88585	1007.7	1.4617	0	0.938908	0.00912518	0.224912	0.965745	0.0741375	11.3848	6.58941	89.918	30.4987	118.537	23.3044	202.507	37.792	16031.8	1.08721	13.293	912.301
BLS17-41-A23	Li-poor pegmatite	1778.1	12.5977	97%	Inherited	23.6589	549.261	21.6816	776.08	1.26904	0.00117761	2.54204	0.014852	0.441389	1.61825	0.124214	12.8859	5.4372	66.32	23.9002	102.226	20.8968	183.412	36.8739	14447.2	0.946852	31.0464	573.72
BLS17-41-A24	Li-poor pegmatite	884.979	6.27461	98%	Inherited	37.2817	2285.61	7.17242	4816.46	1.28821	0.0120587	1.11655	0.0949864	1.44004	5.24671	0.0768225	49.3114	25.6907	374.021	158.646	755.364	167.562	1500.2	296.509	14908.4	1.06606	153.222	934.08
BLS17-41-A25	Li-poor pegmatite	218.756	1.63568	97%	Magmatic	28.0952	797.145	7.14291	1286.78	1.91024	0.0699851	2.59611	0.12494	1.68697	4.78505	0.260554	26.8286	9.89289	118.727	42.7209	189.09	40.8334	390.545	79.9541	14645.7	1.22091	114.716	729.199
BLS17-41-A26	Li-poor pegmatite	253.014	1.6342	99%	Inherited	20.9519	2168.56	5.26811	4538.66	41.276	63.0836	202.401	16.1456	69.2981	23.2362	1.73433	85.2233	30.8323	388.946	151.627	682.294	140.263	1186.69	214.942	13663.8	8.99486	1265.84	1537.15
BLS17-41-A27	Li-poor pegmatite	213.356	2.27848	97%	Magmatic	45.4002	750.628	3.26862	1183.05	2.47	0.0087764	3.75059	0.0332321	0.481448	2.92009	0.273171	23.5637	10.5464	117.911	35.9154	143.06	30.2715	295.659	62.9973	15453.9	1.7153	98.6753	1486.36
BLS17-41-A28	Li-poor pegmatite	250.005	3.09266	99%	Inherited	24.0435	803.019	56.26	1975.1	1.76155	0.00562937	31.7305	0.138547	2.75422	6.87261	2.00884	42.809	16.2974	187.112	67.4964	288.216	60.2732	556.244	111.025	12619.9	0.900147	171.873	722.981
BLS17-41-A29	Li-poor pegmatite	210.583	2.35602	99%	Magmatic	31.6246	999.633	13.8281	1530.83	1.45197	0.00759157	1.18014	0.121838	2.62802	10.3954	0.220321	65.2719	20.0967	176.093	50.3565	178.439	31.9161	245.708	45.087	12599.2	0.671984	64.1084	660.778
BLS17-41-A3	Li-poor pegmatite	209.877	1.73504	97%	Magmatic	44.3341	1078.93	1.38606	1510.25	1.91903	0	0.448394	0.0284202	0.617552	3.21861	0.259572	32.9591	16.8377	179.166	47.9386	149.56	24.3807	187.315	34.7295	14286.7	1.86885	20.9542	1214.04
BLS17-41-A30	Li-poor pegmatite	212.516	1.82148	97%	Magmatic	23.6917	1006.6	10.3803	1263.7	0.758777	0.0146553	0.853242	0.118369	1.75724	8.71469	0.173246	56.8374	17.4724	154.273	41.9078	139.876	23.7082	181.805	30.95	13967.1	0.411123	44.379	516.57
BLS17-41-A31	Li-poor pegmatite	210.281	2.07412	99%	Magmatic	57.4473	2119.77	3.19709	3111.94	1.9785	1.56032	3.82177	0.35748	2.34178	6.4941	0.469442	63.9791	30.7666	357.685	101.427	322.206	51.5928	390.325	68.8045	14212.3	1.52829	41.6169	1967.63
BLS17-41-A32	Li-poor pegmatite	246.485	2.63996	98%	Inherited	20.8781	544.805	4.37937	1670.82	8.3417	0.0248398	55.3314	0.221615	4.22918	7.43836	1.36011	37.7544	11.7615	141.535	55.5905	255.919	60.9472	615.889	135.879	10750.5	2.05003	564.055	632.8
BLS17-41-A33	Li-poor pegmatite	213.926	1.98343	97%	Magmatic	55.5062	1550	11.8554	2127.07	1.20676	0.0413243	1.99568	0.245188	4.89048	14.2335	0.665207	72.6588	25.589	255.47	69.6648	226.444	38.2697	285.065	51.1847	13404.3	0.748101	146.744	1632.15
BLS17-41-A34	Li-poor pegmatite	198.511	1.71231	98%	Magmatic	64.3738	2193.68	104.477	3300.87	1.57882	0.0739559	0.652745	0.117565	2.72307	14.4681	0.584335	123.854	50.4101	456.849	107.839	295.123	44.1311	308.492	51.81	13677.1	1.04068	48.1215	2271.64
BLS17-41-A35	Li-poor pegmatite	199.66	1.64847	95%	Magmatic	77.0299	1968.39	3.29409	2919.89	1.69386	0.131178	1.48349	0.125223	2.28536	10.6759	0.940005	92.8935	40.4965	388.128	96.9473	276.048	39.806	299.849	50.7772	13201.5	1.15108	46.4177	2126.69
BLS17-41-A36	Li-poor pegmatite	213.792	2.52997	94%	Magmatic	38.6562	877.335	3.19305	1491.18	1.66816	0.0484722	2.30473	0.068658	1.70671	4.99804	0.231618	36.569	13.4618	147.471	48.2859	194.271	37.9067	344.773	65.1253	15196	1.04786	75.2684	946.545
BLS17-41-A37	Li-poor pegmatite	206.195	2.18633	99%	Magmatic	29.574	623.377	3.15353	1802.88	5.27657	0.00942906	6.17507	0.178295	2.94238	7.92736	0.580151	46.2978	16.2952	177.357	60.6882	238.24	46.2933	386.56	71.3979	13344	2.01117	255.597	815.04
BLS17-41-A38	Li-poor pegmatite	1910.22	24.6905	86%	Inherited	53.3476	382.495	5.5625	658.52	8.67117	0.0641953	6.35814	0.0467191	0.356927	0.897336	0.153615	7.53556	3.60605	46.8551	20.7646	106.417	26.2296	268.578	59.1248	14952.2	8.11871	138.369	1098.56
BLS17-41-A4	Li-poor pegmatite	214.158	2.54193	96%	Magmatic	125.097	1504.51	2.24257	1791.76	3.64219	2.17907	6.75806	1.16087	6.33833	5.42782	1.16821	28.7073	13.306	160.125	53.3595	240.387	56.9989	581.158	114.007	22716.2	6.83226	65.6421	6926.5
BLS17-41-A5	Li-poor pegmatite	206.997	2.00257	99%	Magmatic	81.8956	858.083	6.47463	1379.74	2.29359	0.0660339	8.59516	0.0537779	0.571119	2.15316	0.41476	19.1063	9.51199	120.09	42.9539	195.956	46.1519	466.384	95.0722	18368.8	2.6333	49.8845	2941.39
BLS17-41-A6	Li-poor pegmatite	215.328	2.63463	98%	Magmatic	61.1768	1304.2	4.19062	2052.66	2.19254	0.0187489	1.90635	0.0283002	0.41147	3.40696	0.237786	33.2246	16.8617	200.995	62.8035	245.253	49.1708	416.455	75.6166	16704.3	1.87738	45.0565	2290.79
BLS17-41-A7	Li-poor pegmatite	206.432	2.39896	99%	Magmatic	90.0334	1847.67	4.3029	3006.18	4.70032	172.377	355.341	37.4582	146.095	32.4767	0.597766	63.7714	24.8762	290.283	98.7661	419.963	90.713	831.189	159.315	18871.2	3.81595	155.966	3512.35
BLS17-41-A8	Li-poor pegmatite	208.551	1.38433	98%	Magmatic	127.674	739.129	0.723599	961.089	2.32134	0	0.0945082	0	0.114905	0.62955	0.0756223	6.64096	4.57538	69.002	26.9537	138.832	38.4602	427.12	89.1791	23064.4	4.14444	10.1649	4598.57
BLS17-41-A9	Li-poor pegmatite	294.881	3.2896	96%	Inherited	13.7882	302.839	3.92014	574.629	0.650514	0.00510458	8.32162	0.0137668	0.696862	1.30795	0.221937	9.15457	3.39247	45.0545	18.3691	86.0553	19.8126	188.592	43.4067	12871.3	0.520493	107.867	303.935
BLS-46-A10	Li-poor pegmatite	197.862	1.33213	89%	Magmatic	119.102	180.352	0	127.608	0.646592	0	0	0	0	0	0	0.174006	0.36924	5.92927	2.45678	15.6916	5.77195	76.3159	15.6782	38167	19.8631	7.90593	2308.02
BLS-46-A13	Li-poor pegmatite	183.438	1.29845	92%	Magmatic	203.241	259.094	0.876237	77.586	5.06371	0.00944032	0.0177369	0.00717174	0.00209228	0.0966435	0.0143951	0.35974	0.210605	3.89582	1.37	9.25388	3.69076	61.4207	13.6178	50645.6	40.5273	21.1504	4085.98
BLS-46-A15	Li-poor pegmatite	199.069	1.3877	79%	Magmatic	185.179	262.786	0.668941	71.9006	1.85513	0	0.0239839	0.00646391	0	0	0	0.121514	0.198548	3.88423	1.36195	8.16273	2.96596	45.1273	10.0977	30640.4	18.5258	20.3717	3661.23
BLS-46-A16	Li-poor pegmatite	211.218	1.8945	93%	Magmatic	240.943	469.697	2.36487	373.938	6.71356	0.0267098	0.125455	0.00289801	0.0675998	0.15625	0.0221595	0.980506	0.92255	18.9187	9.19921	56.9601	18.3215	226.412	44.4745	31536.5	23.1408	20.9346	3527.38
BLS-46-A18	Li-poor pegmatite	202.835	1.32306	99%	Magmatic	181.36	333.172	0.467214	99.4602	1.09643	0	0	0	0.0285057	0.0387066	0	0.372849	0.310251	6.25805	1.98793	10.3174	3.34732	37.1366	6.37388	35582.5	3.79624	8.51644	3715.01
BLS-46-A19	Li-poor pegmatite	185.255	1.20685	78%	Magmatic	185.017	423.612	3.91833	121.122	9.87501	0.0162037	0.0947938	0.00410169	0.0717379	0.0691176	0.027443	0.411037	0.363403	6.04094	2.28438	13.2193	5.15533	74.1238	15.5919	35964.2	21.0507	31.6394	4211.13
BLS-46-A2	Li-poor pegmatite	207.368	1.49088	94%	Magmatic	1425.9	275.353	4.00139	65.1282	2.92848	0	0.0294054	0.0118956	0.0347456	0.0801053	0	0.448222	0.276666	3.84442	1.20283	6.78114	2.19097	31.5446	6.4647	30605.1	26.4076	17.7821	3253.29
BLS-46-A21	Li-poor pegmatite	198.392	1.64946	80%	Magmatic	192.476	215.696	1.1708	83.6113	3.67172	0.0250348	0.038689	0	0	0.128145	0	0.499173	0.359605	4.94206	1.66546	8.80065	3.51889	46.7894	9.92387	35865.9	15.7724	20.5217	3264.84
BLS-46-A24	Li-poor pegmatite	207.346	5.43007	63%	Magmatic	222.807	934.262	0.0240215	1021.95	4.29413	0.0281561	0.205597	0.0587822	0.15567	0.471795	0.0418252	5.18343	3.31321	60.2256	27.8299	174.753	59.0994	748.646	163.505	30251.9	14.8937	63.7158	7303.68
BLS-46-A25	Li-poor pegmatite	180.296	1.427	81%	Magmatic	233.448	309.569	0	88.252	2.77237	0.045575	0.197997	0.00803165	0.0755828	0.0874814	0.0165345	0.645581	0.366339	4.83914	1.53918	9.5607	3.76508	53.0259	12.2234	39147.8	44.3819	36.4462	5454.53
BLS-46-A27	Li-poor pegmatite	185.844	1.37654	83%	Magmatic	168.903	215.743	0	33.6098	2.03952	0.0124261	0.0612791	0.00441607	0	0.0159014	0.00901557	0.11801	0.0768275	1.61812	0.653734	5.10185	2.20676	35.519	8.07964	38293.2	6.16917	10.4729	2945.98
BLS-46-A4	Li-poor pegmatite	206.101	2.31257	91%	Magmatic	132.242	168.214	0.220417	53.25	1.48405	0.0180898	0.101969	0	0	0.030865	0	0.115097	0.191949	2.72226	1.03202	6.66926	2.45452	32.6184	6.97183	37045.1	6.60565	9.09885	1895.7
BLS-46-A5	Li-poor pegmatite	210.944	2.24589	71%	Magmatic	172.336	1668.54	1.8128	2848.83	9.12203	0.292708	1.28642	0.213731	1.02802	2.48865	0.0937015	22.4104	14.4292	209.069	67.9713	323.496	85.4371	941.605	169.516	18559.9	19.3476	137.393	3779.28
BLS-46-A7	Li-poor pegmatite	208.324	1.41999	97%	Magmatic	198.301	388.488	0.660112	104.32	3.96055	0.0225993	0.055201	0.0274789	0.100283	0.138813	0.0262645	0.431156	0.364456	5.93672	2.09056	12.3596	4.35239	59.4318	11.779	35415.2	8.41547	15.8695	4837.59
BLS-46-A9	Li-poor pegmatite	208.435	1.57381	77%	Magmatic	216.673	1236.25	13.5319	500.581	65.5733	0.0013309	0.4061	0.0293262	0.13694	0.438038	0.0336361	2.17081	1.62186	26.6148	9.87633	60.2864	20.1719	255.01	47.2549	30377	71.743	60.2485	6711.17
BLS17-24-A1	Li-rich pegmatite	210.355	2.97441	96%	Magmatic	337.398	1584.72	1.26834	989.553	15.059	0.029413	0.0869451	0.0111629	0.05201	0.481778	0.0190759	5.68369	4.56264	67.7062	20.0396	92.7625	27.6204	328.052	51.5204	27194.1	20.8804	5.82056	3207.54
BLS17-24-A10	Li-rich pegmatite	210.489	2.80119	97%	Magmatic	179.535	778.042	0	333.654	6.94734	0	0.0756777	0	0.0507865	0	0	0.436163	0.746647	16.5284	6.39668	33.661	9.97958	124.705	19.4902	32171.8	16.7897	7.9061	3404.5
BLS17-24-A11	Li-rich pegmatite	197.652	1.11265	96%	Magmatic	229.44	1131.15	1.63804	643.829	27.4137	0.0101382	0.0809395	0.0115356	0.0447262	0.38921	0.0073506	4.63329	3.47611	49.6997	12.8305	52.8872	13.9671	152.996	21.7011	27469.3	15.6881	14.8861	5045.54
BLS17-24-A13	Li-rich pegmatite	208.499	1.51557	83%	Magmatic	172.867	5049.33	2.20152	386.309	11.9037	0.00876638	0.0576359	0	0.077327	0.089745	0.0127108	1.03756	1.2628	23.5365	8.05538	38.8922	11.1427	131.985	19.5682	30238.2	14.6192	16.1451	3557.09
BLS17-24-A2	Li-rich pegmatite	201.779	2.3916	73%	Magmatic	197.838	2260.14	1.65951	694.647	30.2743	0.129243	0.140329	0.00182877	0.057111	0.330778	0.0562526	2.75985	2.88717	45.2242	13.8956	63.7334	19.1588	227.191	35.9833	23898.9	18.992	19.2175	4354.83
BLS17-24-A3	Li-rich pegmatite	206.476	1.6211	99%	Magmatic	204.052	899.159	1.67687	497.776	11.077	0	0.0699434	0.0223738	0.0550569	0.198356	0.0224875	1.86812	1.7138	30.7701	9.75165	46.5	13.4829	151.355	22.731	31853	17.9567	8.79634	4305.18
BLS17-24-A5	Li-rich pegmatite	204.321	1.68117	96%	Magmatic	165.678	607.519	0	533.905	2.44379	0	0.0512612	0	0	0.205632	0	2.9767	2.79516	40.4275	10.7799	40.9235	10.4384	102.753	15.7875	34850.6	6.82262	4.91358	3380.96
BLS17-24-A6	Li-rich pegmatite	212.646	1.85675	97%	Magmatic	174.923	1091.56	0.80231	930.384	5.55059	0.035648	0.153242	0.0142065	0.0511294	0.547609	0.009034	5.1409	5.12437	70.7695	19.3046	78.7433	21.9099	248.195	37.5527	28406.9	16.5352	11.951	3349.71
BLS17-24-A7	Li-rich pegmatite	206.675	1.29185	97%	Magmatic	218.907	808.03	0.655266	595.442	8.12876	0.0181999	0.0683791	0.003667	0.0267893	0.186319	0.0175994	2.72089	2.77694	42.0257	11.9681	51.0433	14.1193	154.592	23.3036	27052.8	14.7303	7.48877	3990.69
BLS17-24-A8	Li-rich pegmatite	209.989	1.67223	98%	Magmatic	170.273	760.87	1.21482	295.405	9.40898	0.00640177	0.0661433	0	0	0.131075	0	0.827675	1.15759	19.2467	5.80302	28.4991	8.56973	95.5064	14.5623	32528.8	12.0142	28.7102	2734.05
BLS17-24-A9	Li-rich pegmatite	166.814	1.66474	86%	Inherited	1.95965	225.104	13.0687	1909.82	11.8066	0.0514719	11.5909	0.137266	2.29378	5.42115	2.11192	39.7544	13.339	165.245	64.4278	286.759	61.3422	559.74	119.408	10775.5	7.79913	269.119	770.789
BLS17-24-A10	Li-rich pegmatite	1684.4	10.9228	96%	Inherited	11.4268	80.9711	11.4472	321.754	2.59827	0.0367602	18.1869	0.111018	1.86155	2.64239	1.05912	10.4435	2.72408	29.2473	10.8562	48.8053	10.8325	111.796	26.1293	15893	1.95174	273.71	707.049
BLS17-24-A11	Li-rich pegmatite	1796.23	11.0579	98%	Inherited	7.98637	204.734	10.6422	730.068	3.94221	0.0766347	79.4988	0.482987	7.43818	11.4037	3.71518	41.0481	9.82416	87.2725	25.6785	93.9693	17.434	145.943	29.4993	13622.3	1.60431	991.899	607.169
BLS17-24-A12	Li-rich pegmatite	1402.11	12.5405	80%	Inherited	15.07	146.654	14.4632	601.764	4.41226	0.324271	24.3454	0.174641	1.94239	3.9633	1.3918	20.6017	5.53267	57.8714	19.7187	88.7896	18.6233	170.731	36.0466	16579.3	1.82075	463.955	729.812
BLS17-24-A13	Li-rich pegmatite	1725.3	9.41347	96%	Inherited	8.73827	121.307	6.38152	389.996	2.62853	0.0591583	26.3068	0.174124	2.38145	4.17888	1.35378	16.6288	4.20938	40.2981	12.9101	55.1526	11.2713	108.723	24.6459	19202.1	1.28711	354.862	615.009
BLS17-24-A14	Li-rich pegmatite	1752.77	10.0565	97%	Inherited	6.70776	167.2	4.81037	742.763	3.97688	0.104261	58.9988	0.618812	9.45475	13.1767	3.51118	40.9722	9.67834	86.5074	26.5499	103.415	20.2911	179.503	37.2793	15970.5	2.44424	882.23	777.729
BLS17-24-A15	Li-rich pegmatite	842.761	4.95282	92%	Inherited	1.13572	1177.79	12.3761	2234.04	0.54493	0.0739654	1.40286	0.165851	2.76184	7.9975	0.810441	57.8757	21.7021	241.017	81.0574	313.913	58.8771	486.318	93.3465	15375	0.33389	67.5999	242.394
BLS17-24-A16	Li-rich pegmatite	1953.93	16.6504	94%	Inherited	18.8803	232.06	15.2819	695.865	1.83026	9.61005	156.731	13.4479	107.815	37.2193	16.1949	33.1637	6.43116	64.6509	24.4172	110.194	23.8865	229.997	49.9038	11686.4	0.598326	227.982	335.944
BLS17-24-A17	Li-rich pegmatite	2029.51	20.1566	98%	Inherited	13.3842	251.749	11.0012	615.039	1.56481	1.31207	19.249	0.725237	5.43901	3.58243	0.663775	14.0712	4.671	54.4871	21.5212	100.735	21.8567	205.437	43.5626	11829.2	0.811849	151.51	290.645
BLS17-24-A18	Li-rich pegmatite	2219.14	13.0913	97%	Inherited	4.46914	234.74	7.52221	532.209	1.26202	0.0983727	13.8662	0.162718	1.33217	1.80797	0.325258	10.472	3.5516	44.6293	18.0891	87.1216	19.9974	195.474	42.9783	13450.3	0.667613	110.473	227.491
BLS17-24-A19	Li-rich pegmatite	2201.39	14.6621	98%	Inherited	2.66415	310.562	8.96664	740.682	1.14155	0.409013	13.3768	0.546374	4.69209	3.75083	0.880411	16.6129	5.54311	64.2629	25.9832	121.29	26.5999	251.624	55.5759	11383.4	0.693925	132.582	233.334
BLS17-24-A20	Li-rich pegmatite	2112.78	20.4244	99%	Inherited	5.30053	309.111	11.8759	1036.14	1.51079	4.12906	54.3606	4.30009	45.1882	18.6119	5.34024	35.0654	9.02568	99.1114	36.6616	165.491	34.4834	327.771	69.4071	9934.06	0.549201	194.312	278.783
BLS17-24-A21	Li-rich pegmatite	1618.64	19.3279	89%	Inherited	62.8228	1893.19	24.4871	1320.63	3.63662	22.0024	91.3622	8.26264	43.0787	15.5055	2.01934	39.0152	11.2328	125.26	46.9762	211.582	44.0776	406.379	82.1744	11733.5	1.61969	625.802	806.462
BLS17-24-A22	Li-rich pegmatite	2011.44	12.6399	97%	Inherited	18.1789	412.975	20.1248	948.591	3.00026	5.64738	78.3955	6.27717	42.7184	17.728	5.52581	33.2981	8.1808	87.4319	32.7064	149.992	32.0207	304.361	64.2782	10730.4	1.11983	440.889	505.321
BLS17-24-A23	Li-rich pegmatite	2208.34	15.4069	97%	Inherited	13.4293	246.793	7.93479	731.806	1.22283	3.89669	27.3141	3.26015	19.6916	7.64663	1.36263	19.375	5.64736	63.6389	25.5321	119.261	25.768	249.461	53.9054	12428.7	0.682515	170.755	310.954
BLS17-24-A24	Li-rich pegmatite	1539.7	14.3046	85%	Inherited	48.5804	575.215	168.163	1646.74	6.10107	28.5375	244.272	23.8758	155.929	50.5042	11.1018	78.9365	16.6755	165.559	57.3335	237.156	47.3723	419.736	84.5017	10333.2	1.81233	848.417	818.535
BLS17-24-A25	Li-rich pegmatite	1682.99	14.7474	90%	Inherited	37.2058	320.145	24.5802	786.137	2.98742	13.5909	192.329	13.5656	112.049	49.4935	16.9922	54.9706	8.54997	76.7061	26.425	116.736	25.4923	243.521	52.3752	12352.5	0.833767	363.871	470.596
18KL14-5-1	Granite	832.851	10.7735		Magmatic	0.165423	993.559	15.4373	941.986	1.19145	5.59747	35.3873	1.94092	9.7708	7.02461	1.7649	26.9308	7.63655	84.4485	30.9852	135.219	28.981	274.394	55.4677	10682.8	0.507747	79.4157	59.2282
18KL14-5-2	Granite	830.932	10.2922		Magmatic	0.285523	299.084	12.8152	1112.72	1.15664	0.00578424	20.5759	0.299996	4.54298	6.87334	2.42052	32.957	9.16075	101.747	36.4055	159.367	34.2436	316.8	65.0925	9592.39	0.382476	103.949	68.1514
18KL14-5-3	Granite	834.738	12.2901		Magmatic	0.990466	330.937	14.3734	817.067	0.892687	0.0346502	16.8186	0.161226	2.61569	5.03408	1.47294	22.0483	6.51654	74.0307	27.1832	120.25	24.7995	233.871	47.7422	10018.8	0.379906	60.0751	44.7443
18KL14-5-4	Granite	836.666	10.5891		Magmatic	0.0811035	295.644	15.1278	677.752	0.812111	0.0297601	13.4625	0.197915	2.92816	4.72886	1.54335	18.3906	5.25699	57.612	22.1231	98.1227	21.4693	208.45	44.4639	9021.12	0.315274	54.2268	40.9332
18KL14-5-5	Granite	830.997	10.3916		Magmatic	1.55141	234.532	17.55	414.752	0.888099	0	15.05	0.0419841	0.853021	1.79398	0.627861	9.98868	2.92523	34.9918	13.4192	63.5614	13.9054	135.219	27.9497	9594.3	0.38637	39.8031	38.8785
18KL14-5-6	Granite	832.474	9.78291		Magmatic	0.813883	2985.62	140.06	598.502	1.29214	19.0751	51.4055	4.71042	20.8884	7.25918	1.82142	18.4287	5.01094	52.4834	19.6051	88.463	18.4772	178.193	37.4134	9378.69	0.396915	47.5597	37.3203
18KL15-4-1	Granite	516.101	6.39975		Magmatic	0.275925	413.924	2.45118	1449.12	2.49824	0.0180766	8.91761	0.141707	2.25476	4.7657	1.75095	28.6149	9.74799	121.657	46.8503	217.359	46.8811	439.487	90.1631	15697.8	1.38007	123.57	335.459
18KL15-4-2	Granite	508.716	6.39323		Magmatic	0	464.201	0.0816289	961.441	2.24012	0	6.24585	0.0167254	0.839927	1.84317	0.834605	16.4572	6.17819	77.264	31.2915	151.965	35.918	391.913	89.0281	13662.9	1.49918	77.7159	386.589
18KL15-4-3	Granite	515.944	6.44297		Magmatic	0	1744.56	26.6262	1336.15	2.32649	0.798022	13.185	0.49787	4.24879	4.57605	1.58155	28.1645	9.37812	114.817	43.7975	204.762	43.5679	416.848	87.4593	9270.19	1.0273	98.0818	209.529
18KL15-4-4	Granite	525.715	6.6891		Magmatic	0.748485	270.485	3.13158	809.887	1.55107	0.00693548	5.93826	0.0301939	0.353926	1.52098	0.591057	12.1238	4.46848	62.9319	25.8455	123.252	28.2444	278.979	58.8011	14524.4	0.719658	56.6237	214.817
18KL15-4-5	Granite	513.36	6.55914		Magmatic	0.186355	983.052	58.4038	2668.96	2.4084	0.128084	16.7359	0.197418	3.22814	7.31546	3.52849	51.8807	18.1546	215.427	85.3255	392.243	83.1574	777.677	164.803	9141.33	0.774203	228.515	381.994
18KL15-4-6	Granite	512.007	6.41374		Magmatic	0	772.652	18.0694	1442.27	2.78619	0	3.612	0.0216546	0.189025	1.3394	0.676181	12.023	6.26054	99.2077	46.3743	247.123	62.3502	665.04	142.93	15627.7	2.5062	47.0797	578.674
18KL33-3-1	Granite	452.372	6.55716		Magmatic	43.2531	218.893	2.26539	676.219	3.31484	0.106473	39.551	0.0579786	0.877325	1.39462	0.734885	8.87332	3.0794	42.8156	18.9473	105.593	26.2784	288.405	72.2277	11599.1	0.970045	737.808	1083.01
18KL33-3-2	Granite	454.467	6.5928		Magmatic	30.376	297.544	5.13936	747.242	3.50273	0.211572	39.6891	0.118621	1.06279	2.24182	0.80214	11.5113	4.06704	53.6655	22.7073	115.751	28.3668	297.853	65.7256	11428	1.31792	577.449	762.466
18KL33-3-3	Granite	442.007	6.44056		Magmatic	26.1295	242.831	4.0923	849.69	3.70656	0.0147772	28.5993	0.0250568	0.791263	1.52111	0.714103	11.4122	4.32781	57.741	24.9737	132.923	33.5796	352.051	81.2227	12157.3	1.64879	250.561	500.579
18KL33-3-4	Granite	450.843	6.56193		Magmatic	24.7291	251.28	13.8517	786.42	3.63275	0.984627	37.0362	0.239816	1.77506	1.96437	0.743134	12.4317	4.07831	54.6582	23.8263	121.721	29.5225	312.088	71.1818	11765.9	1.37419	347.353	545.894
18KL33-3-5	Granite	447.274	6.52309		Magmatic	22.3744	209.222	5.55869	1023.81	4.86657	0.175981	48.8407	0.0640008	1.31482	3.03321	0.933033	14.2807	5.35494	71.5899	30.9595	156.893	38.8757	415.459	93.3919	11746.8	1.7252	467.908	702.732
18KL33-3-6	Granite	454.354	6.66822		Magmatic	9.5649	244.636	4.13947	760.663	2.33785	0.0207361	31.3433	0.0339517	0.723635	1.68346	0.873685	11.6584	4.30968	57.3987	24.4192	118.092	27.3721	279.817	61.5612	11265.4	1.248	361.401	546.086
18KL33-3-7	Granite	439.254	6.39468		Magmatic	20.3315	669.453	4.47157	798.207	3.13808	6.29963	41.1611	1.04335	4.5312	1.86729	0.557499	10.4707	4.37532	54.8183	24.2492	126.26	31.3646	336.178	78.446	11731.6	1.64262	329.167	600.838
18KL33-3-8	Granite	450.144	6.61158		Magmatic	27.0738	606.823	8.15705	1010.17	5.21254	5.58035	63.6981	1.15145	6.22757	3.09494	1.19892	17.6162	5.99535	74.4498	31.2261	153.675	37.0954	373.682	79.8907	11468.2	1.87629	771.196	844.413
18KL28-3-1	Granite	431.447	5.50281		Magmatic	16.6863	307.466	5.63234	1189.16	5.35542	0.0879604	11.8325	0.100066	1.6512	2.94286	0.830764	18.4271	7.02393	94.2933	38.0168	186.602	42.1112	420.244	89.2232	9473.4	4.72236	235.02	483.404
18KL28-3-2	Granite	444.123	5.68855		Magmatic	48.7624	155.38	4.33148	1345.51	11.0081	0.0178479	24.7524	0.0519326	0.574333	1.55805	0.701537	10.9066	4.74911	71.1482	35.0399	212.057	59.0591	715.453	189.133	13751.4	3.36576	1095.29	7656.71
18KL28-3-3	Granite	444.815	6.83003		Magmatic	39.2408	95.1613	0.22414	312.343	2.70142	0.00536622	3.87683	0	0.0208613	0.185044	0.0630942	1.5251	0.678296	13.179	7.28082	54.318	16.9286	221.693	64.2961	15037.3	0.958045	109.985	1071.93
18KL28-3-4	Granite	457.622	5.78499		Magmatic	12.2249	218.616	5.53986	771.083	3.32918	0.0104401	32.9401	0.0416962	0.462955	1.71764	0.618781	11.057	3.76911	49.4108	22.406	120.069	30.7575	327.261	78.8796	11653.2	1.22854	368.998	611.546
18KL28-3-5	Granite	457.691	5.80374		Magmatic	17.2327	245.432	3.1651	1489.06	10.0809	0	18.44	0.0158936	0.693484	1.42118	0.647322	15.7413	7.11247	99.813	44.9687	237.665	57.3924	586.346	128.95	10838.9	3.20414	257.687	1208.78
18KL28-3-6	Granite	452.11	5.60197		Magmatic	33.2502	1428.66	3.51401	1182.71	7.55165	4.46997	29.7013	1.49294	7.7724	3.3148	0.951579	17.1298	6.45146	88.0007	37.1167	190.043	43.2052	436.489	92.901	10391.5	1.99285	406.7	1350.98
18KL58-1-01	Granite	325.14	4.78151		Magmatic	0.0479734	559.904	4.75128	1454.46	0.887629	0.169367	3.78212	0.135107	1.20265	2.16326	0.225567	19.2533	8.09974	114.694	50.2088	239.711	51.6532	492.727	99.8981	11070.9	0.325871	19.6695	76.0571
18KL58-1-02	Granite	330.434	4.83353		Magmatic	0	405.661	2.80897	1309.13	0.994238	0.00352145	3.26897	0.0136369	0.464169	1.6443	0.230265	17.4417	7.4673	102.976	44.9572	212.027	45.7766	433.348	87.7606	11036.6	0.355413	29.6293	96.0294
18KL58-1-03	Granite	322.176	4.75989		Magmatic	0	277.539	4.47691	714.606	0.421429	0.00356587	1.62904	0.0110521	0.190264	0.885568	0.116537	8.8504	3.72365	52.6582	23.8578	118.809	26.5087	264.672	57.4852	10990.5	0.162781	8.64654	41.3966
18KL58-1-05	Granite	327.793	4.85006		Magmatic	0	678.242	5.35017	1717.96	0.851379	0.393691	5.15126	0.261365	1.95959	2.847	0.392202	24.3539	10.0395	136.802	59.5441	277.786	59.1868	561.196	116.206	10500.7	0.325678	27.3851	87.5305
18KL58-1-07	Granite	327.181	4.82014		Magmatic	0.43005	578.856	3.60246	1723.1	0.843992	0.00185365	2.86201	0.0215818	0.404507	2.3798	0.346352	24.3747	10.0044	140.061	60.8703	283.053	60.4315	559.452	113.203	10340.7	0.278915	18.4708	72.6203
18KL58-1-08	Granite	327.094	4.78623		Magmatic	0.0118872	471.731	4.30256	1344.25	0.754632	0	2.99478	0.0154594	0.411818	1.68472	0.242136	17.7437	7.38006	106.077	46.0946	224.521	48.3284	461.487	94.2679	11041.8	0.314496	15.3856	67.6761
18KL58-1-09	Granite	325.073	4.78051		Magmatic	0.625533	1711.9	3.17727	2410.81	0.688061	1.91527	10.2495	1.28556	8.15666	6.57705	0.525482	36.5014	14.3612	192.958	82.4729	386.537	81.7091	765.583	155.091	11528.2	0.30794	23.6785	88.407
18KL58-1-10	Granite	327.04	4.81467		Magmatic	0.0729076	677.391	4.30463	2324.57	1.676	0.0123724	6.38163	0.0263643	0.762329	3.01872	0.313526	31.5933	13.4129	184.245	79.1791	375.244	78.8755	745.154	150.132	11410.1	0.593329	71.8055	183.092
18KL47-1-02	Granite	350.239	7.66095		Magmatic	0.12347	1252.12	6.34344	5888.05	5.43565	0.697846	28.8074	0.50763	5.69343	13.2532	1.57385	104.442	39.931	518.158	203.867	907.364	184.691	1621.22	310.976	10116.6	1.32626	285.861	255.398
18KL47-1-03	Granite	327.992	5.87042		Magmatic	0.146529	753.326	6.06741	2721.22	1.57665	0.00606201	8.61595	0.0359306	1.04633	3.96085	0.742409	40.852	16.4324	226.143	92.7158	433.553	91.9582	849.795	170.587	9849.52	0.553776	70.8909	99.2988
18KL47-1-04	Granite	335.28	6.44737		Magmatic	0.0677913	1439.38	7.69974	6472.11	7.26483	0.0257777	34.0871	0.258405	5.46862	17.4672	1.68781	133.329	47.753	589.86	224.132	983.372	192.77	1698.36	318.575	10143	1.84493	584.257	356.404
18KL47-1-05	Granite	340.335	6.77348		Magmatic	0	477.496	8.51788	1639.32	0.838836	0	4.89604	0.0230416	0.610725	2.42454	0.470316	21.9207	9.42416	133.859	55.3889	264.174	57.3471	528.386	107.331	10084.3	0.360743	31.8496	55.6354
18KL47-1-06	Granite	323.906	6.4513		Magmatic	0.742322	690.566	9.01645	3529.18	1.3297	0.0125411	6.28498	0.118862	2.17717	6.56993	1.28093	56.0554	22.1117	301.705	121.406	551.565	115.889	1041.83	210.95	9585.8	0.880633	52.5227	90.8468
18KL47-1-07	Granite	332.978	5.99752		Magmatic	0.393136	1023.84	8.89976	3378.57	1.88832	0.146828	11.8373	0.258292	3.06676	8.11545	0.674558	61.3047	22.6598	291.997	115.171	517.136	103.979	933.534	183.298	10017.7	0.616658	143.43	117.551
18KL47-1-08	Granite	341.691	6.39931		Magmatic	0.917279	1440.63	14.9452	3485.62	2.97879	1.46254	16.9401	0.943982	6.76739	7.36773	0.883703	56.2343	21.5503	288.378	117.512	544.583	113.514	1043.98	206.938	10496.3	1.23613	118.42	157.774
18KL47-1-09	Granite	348.716	5.03612		Magmatic	0	1181.76	7.26469	2018.01	1.23517	1.54771	10.6437	0.874573	5.81892	4.13207	0.579058	27.7826	10.9842	155.447	67.8372	332.305	70.6052	679.459	140.02	9816.38	0.441451	30.8255	60.4552
18KL47-1-10	Granite	331.52	5.3358		Magmatic	0.222191	572.732	12.2	1774.51	1.08521	0.00569943	5.46649	0.0242353	0.753348	2.42618	0.527676	24.0983	10.2033	141.413	60.1573	287.768	61.5597	574.94	119.193	9949.05	0.403105	41.1197	64.7968
18KL50-1-01	Granite	352.859	5.42125		Magmatic	0	597.729	5.69735	2055.59	1.54004	0.00185791	6.79567	0.0256652	0.6395	2.5579	0.329197	28.308	11.5541	161.198	69.1041	329.022	70.5504	657.752	133.419	11003.3	0.752666	37.1499	79.0871
18KL50-1-02	Granite	351.702	5.16549		Magmatic	0.14816	2825.28	4.76042	1668.03	0.902033	4.30653	19.6654	2.824	18.7108	7.84341	0.678195	28.8142	10.1715	136.103	57.2624	266.228	56.2414	530.338	108.242	10476.9	0.408509	23.3525	51.23
18KL50-1-04	Granite	355.864	5.21957		Magmatic	0.324787	2119.08	3.56291	2915.23	1.00945	1.20972	11.7958	1.89641	14.4987	10.609	1.08196	52.539	19.3809	248.712	101.581	461.303	95.0312	898.362	170.547	9598.26	0.379814	31.4984	59.0659
18KL50-1-05	Granite	359.173	5.24557		Magmatic	0.199328	896.079	4.74639	4326.9	1.32754	0.23807	8.47853	0.199981	3.69329	9.17469	1.10683	73.1463	28.2747	370.588	150.298	682.145	138.387	1231.45	246.236	10127.7	0.50256	51.5146	86.2547
18KL50-1-06	Granite	342.273	5.03657		Magmatic	1.61918	2007.59	7.81115	3942.33	1.91878	2.24855	16.2359	1.52426	11.3951	12.0993	1.69402	75.0566	26.4871	344.133	136.509	608.19	122.783	1103.12	219.672	9328.67	0.5602	103.672	101.202
18KL50-1-07	Granite	340.448	4.97988		Magmatic	0.573693	655.217	2.14092	2342.78	2.51452	0.00941407	7.84123	0.0240215	0.789975	3.40775	0.441057	32.0886	13.1292	187.438	80.3749	375.048	79.3759	733.669	150.796	11318.6	1.04804	54.9187	100.922
18KL50-1-09	Granite	344.3	5.37688		Magmatic	0.409859	455.817	9.21991	2835.47	0.576912	0.0107896	2.36331	0.0821891	1.99971	5.66487	1.1267	48.0507	17.9282	244.437	100.781	454.804	92.3631	840.25	167.628	9232.19	0.279422	20.3968	45.4602
18KL50-1-10	Granite	343.211	5.05355		Magmatic	1.14367	702.927	2.62248	2318.49	0.790004	0.0110435	2.35214	0.0367056	1.26093	4.15683	0.736143	34.0604	13.847	191.533	81.153	376.29	78.312	718.44	146.053	9181.46	0.24929	15.7749	37.6354
18KL55-3-02	Granite	325.243	4.81688		Magmatic	1.16426	539.746	2.43187	1827.92	0.936944	0.0661648	4.4965	0.0739384	0.871075	2.24279	0.232279	22.0608	9.67997	139.393	60.5896	296.374	64.8826	627.054	129.522	11934.7	0.374231	20.6853	87.3207
18KL55-3-03	Granite	329.987	5.28481		Magmatic	1.24136	699.831	4.16729	2521.4	1.3949	0.131615	5.23294	0.103495	1.35811	3.65017	0.391759	36.0713	14.8402	205.091	86.2569	408.808	86.8751	806.641	162.456	11117.2	0.436622	26.6046	104.443
18KL55-3-04	Granite	307.632	5.35219		Magmatic	0.850006	532.77	3.98482	1583.42	1.26182	0.146558	5.18509	0.0907723	1.117	2.33715	0.176763	20.1138	8.20311	118.66	51.8465	258.542	57.3736	561.942	114.877	12307.1	0.419577	31.8057	115.97
18KL55-3-05	Granite	324.533	4.74938		Magmatic	6.96279	1368.88	23.2727	4136.96	3.52933	1.37476	17.3196	0.948572	7.43053	8.78518	0.529135	63.8258	24.5402	332.088	139.317	653.898	138.971	1313.42	261.361	10982.3	0.899129	158.111	348.942
18KL55-3-06	Granite	325.261	4.76918		Magmatic	0	1578.62	5.22896	1719.67	0.792034	3.08026	12.9255	1.7871	11.2474	6.10278	0.338059	27.5247	10.3765	136.467	59.2296	283.331	60.6726	581.057	120.178	11446.1	0.287564	14.4454	66.5258
18KL55-3-07	Granite	331.332	4.8598		Magmatic	0.157775	502.999	6.40618	2954.79	3.2303	0.1647	9.52089	0.129537	1.46851	5.20789	1.29519	51.7444	20.8288	269.638	107.686	478.766	94.3447	842.41	163.316	8717.69	0.747777	103.162	152.54
18KL55-3-08	Granite	322.867	4.7391		Magmatic	0.0119422	524.131	3.55552	2054.72	0.74685	0.0211932	3.55601	0.0412569	0.593187	3.2386	0.292763	29.6009	12.0289	167.467	70.8058	335.518	69.62	657.841	130.557	11242.9	0.280724	18.2395	71.9209
18KL55-3-09	Granite	323.671	5.57312		Magmatic	0.166259	448.847	4.44946	1217	0.68315	0.0682568	2.95204	0.046189	0.444711	1.9309	0.171782	15.7367	6.56441	94.3872	41.5061	202.66	44.3876	424.77	88.4549	11894	0.276988	13.8495	62.7505
18KL55-3-10	Granite	324.427	4.75787		Magmatic	2.1529	692.87	5.27306	1870.73	0.906811	0.122367	3.36427	0.0813854	1.14447	2.67802	0.274333	25.3292	10.4918	147.045	64.76	307.531	66.4538	627.083	132.199	11519.8	0.297878	18.9064	76.0856
18KL56-3-01	Granite	335.552	4.91467		Magmatic	0.0597709	576.478	3.4193	2264.63	0.820026	0.00342038	3.15915	0.0306703	0.856412	3.94463	0.529757	35.7957	13.8941	186.709	78.7751	366.811	76.7526	692.778	141.286	10360.5	0.262964	24.8163	87.6744
18KL56-3-02	Granite	335.766	4.91614		Magmatic	1.05405	595.994	3.2379	2610.61	0.547154	0.00169825	2.62798	0.0290588	1.07968	5.09996	0.549081	42.5846	16.569	218.902	92.515	425.697	87.3106	798.688	163.47	10195.8	0.232652	21.0468	77.836
18KL56-3-03	Granite	338.089	4.94847		Magmatic	0.243388	505.17	5.43192	1930.62	0.811101	0.0189954	2.70387	0.0129409	0.743258	2.71014	0.375212	27.9734	11.121	157.544	67.7423	318.736	67.6304	643.412	132.737	10460	0.279647	13.5073	59.9974
18KL56-3-04	Granite	338.818	4.95456		Magmatic	2.84357	789.596	2.97889	2122.37	0.726277	0	2.79353	0.0254391	0.658724	2.95452	0.381139	30.5254	12.2115	173.497	72.7603	347.45	73.2369	680.124	137.744	10233.4	0.250135	16.8352	70.8261
18KL56-3-05	Granite	338.826	4.95318		Magmatic	0.193646	595.069	4.89654	1812.14	1.18707	0.0068491	4.0041	0.0159741	0.694768	2.38572	0.294993	25.8522	10.4919	145.007	63.3359	297.304	62.8759	583.585	117.289	10770	0.3902	16.7418	72.4379
18KL56-3-06	Granite	341.616	4.99831		Magmatic	0.512824	855.79	4.5259	3179.49	2.41644	0.00332442	7.19234	0.0335733	1.39419	5.31168	0.485621	49.7485	19.7533	263.533	108.666	502.57	102.266	918.286	180.664	10489.5	0.616011	60.1104	157.361
18KL56-3-07	Granite	348.524	5.09235		Magmatic	2.55088	636.361	3.31244	1925.16	0.528312	0.0292039	2.04907	0.0373385	0.743797	3.23383	0.43765	29.4787	11.5407	156.84	66.3441	312.555	65.213	616.288	125.798	10305.3	0.204546	13.0426	59.3297
18KL56-3-08	Granite	348.677	5.15877		Magmatic	0	454.683	3.9766	2523.12	0.474437	0.0101598	2.79151	0.0472531	1.13433	4.69475	0.616171	41.8077	15.9464	211.498	87.3751	401.342	81.3968	740.484	147.634	10141.2	0.185202	18.7787	64.6407
18KL56-3-09	Granite	328.765	4.84558		Magmatic	0.442742	643.622	3.47094	2813.13	1.14472	0.00518789	4.86599	0.0522449	1.20684	4.71803	0.460665	47.2566	17.5326	237.862	97.9939	447.018	93.1875	848.784	166.816	10422.9	0.328637	30.3107	108.238
18KL56-3-10	Granite	326.777	4.83654		Magmatic	0.585926	845.781	2.76322	3780.77	1.56418	0.00497934	6.2794	0.0565369	1.79177	6.99387	0.602741	61.6852	23.8327	325.029	133.216	602.918	122.897	1102.93	218.98	10764.9	0.449747	44.656	148.66
						Li	P	Ti	Y	Nb	La	Ce	Pr	Nd	Sm	Eu	Gd	Tb	Dy	Ho	Er	Tm	Yb	Lu	Hf	Ta	Th	U
Standards
BCR-2G						9.50	1590	13600	31.5	10.3	24.3	47.9	5.92	27.0	6.15	1.94	6.65	0.924	5.76	1.30	3.23	0.452	3.03	0.482	4.08	0.733	5.49	1.62
BCR-2G						9.40	1620	13600	30.8	10.2	23.3	48.0	5.88	25.4	6.30	1.84	5.69	0.979	5.81	1.14	3.22	0.475	2.78	0.400	4.39	0.727	5.43	1.54
BCR-2G						10.5	1710	13700	29.3	10.1	23.8	50.3	5.97	26.1	6.06	1.90	6.93	0.941	5.86	1.12	2.90	0.345	3.39	0.469	4.32	0.612	5.29	1.65
BCR-2G						8.37	1470	14400	30.3	10.2	23.9	48.5	5.80	26.0	5.98	1.85	6.75	0.977	5.46	1.21	3.71	0.501	3.18	0.568	4.44	0.742	5.68	1.67
BCR-2G						8.60	1620	13100	30.3	9.89	23.2	49.2	5.95	26.2	6.27	1.61	6.13	0.987	5.48	1.12	2.85	0.418	3.23	0.503	4.12	0.617	5.54	1.60
BCR-2G						8.76	0.422	2.27	31.9	10.7	24.9	49.1	6.19	28.1	6.06	2.11	6.54	0.961	5.92	1.12	3.08	0.524	2.79	0.491	4.85	0.696	5.70	1.57
BCR-2G						9.38	0.325	2.24	30.6	10.3	24.1	48.9	6.21	26.2	6.18	1.96	6.34	0.980	5.58	1.29	3.30	0.448	3.15	0.494	4.64	0.626	5.54	1.65
BCR-2G						9.09	0.359	2.22	31.9	10.3	24.8	49.9	5.99	26.4	5.90	1.89	6.05	1.05	5.67	1.25	3.63	0.581	3.19	0.480	4.86	0.704	5.88	1.67
BCR-2G						8.64	1570	14400	29.6	9.30	22.2	45.5	5.34	24.9	5.48	1.77	5.45	0.878	5.53	1.09	2.68	0.403	3.35	0.387	4.06	0.603	5.05	1.42
BCR-2G						8.43	1520	14200	28.8	9.17	22.3	45.4	5.68	25.3	5.91	1.83	5.79	0.816	5.14	1.10	3.06	0.335	2.74	0.452	4.14	0.589	4.99	1.48
BCR-2G						8.19	1530	14500	27.6	9.12	21.3	43.4	5.08	23.3	5.15	1.63	5.50	0.862	5.46	1.02	2.63	0.445	2.80	0.446	3.97	0.598	4.86	1.35
BCR-2G						8.68	1580	14600	29.3	9.17	21.8	45.0	5.23	24.7	5.35	1.77	5.39	0.857	5.42	1.07	2.67	0.396	3.27	0.390	4.00	0.597	4.96	1.41
BCR-2G						9.01	1580	13800	34.8	12.8	24.6	52.9	6.57	28.7	6.57	1.90	6.77	1.09	6.77	1.27	3.51	0.601	3.35	0.540	4.71	0.764	5.87	1.64
BCR-2G						9.37	1620	13900	36.6	12.8	25.2	54.6	6.77	30.3	6.81	2.04	6.58	1.08	6.69	1.33	3.53	0.530	3.90	0.469	4.70	0.761	6.00	1.71
BCR-2G						9.07	1570	13700	35.5	12.5	25.3	54.2	7.17	30.6	7.36	2.05	6.97	1.01	6.27	1.34	3.97	0.438	3.20	0.530	4.77	0.731	5.89	1.77
BHVO-2G						4.85	1150	16500	22.2	14.8	14.2	35.1	4.61	22.7	5.08	2.00	5.19	0.741	4.76	0.885	2.06	0.297	1.84	0.237	4.33	1.00	1.12	0.371
BHVO-2G						4.44	1270	16300	21.6	14.8	14.2	33.8	4.63	22.1	5.52	1.95	5.53	0.836	4.82	0.867	2.05	0.279	1.61	0.230	4.11	0.959	1.11	0.406
BHVO-2G						4.05	1260	16400	21.8	14.7	14.3	34.4	4.65	23.1	5.28	1.56	6.00	0.701	4.69	0.758	1.96	0.317	1.99	0.266	4.15	1.06	1.21	0.388
BHVO-2G						4.29	1200	16900	22.9	15.1	14.1	32.8	4.42	23.0	4.72	1.71	5.12	0.915	4.53	0.933	2.10	0.303	2.16	0.179	4.24	0.958	1.20	0.356
BHVO-2G						4.93	1130	15700	22.1	14.7	14.7	34.3	4.76	23.2	4.86	1.86	5.64	0.800	4.35	0.833	1.91	0.241	2.14	0.296	4.93	1.03	0.920	0.326
BHVO-2G						4.46	0.286	2.70	22.5	14.9	14.9	34.3	4.62	22.7	5.71	2.00	5.95	0.825	5.01	0.890	2.23	0.322	1.96	0.281	4.03	0.990	1.08	0.458
BHVO-2G						4.11	0.252	2.70	22.5	15.3	14.4	35.3	4.45	24.1	5.82	1.87	5.58	0.698	4.89	0.813	2.18	0.283	1.70	0.221	4.20	0.870	1.12	0.390
BHVO-2G						4.66	0.264	2.68	23.1	15.0	14.6	34.4	4.76	22.9	5.66	1.94	5.88	0.847	4.82	0.865	2.16	0.287	2.09	0.243	4.10	1.04	1.09	0.449
BHVO-2G						4.32	1200	16900	20.4	13.3	13.0	31.3	4.18	20.1	4.87	1.89	5.40	0.748	4.34	0.783	2.01	0.254	1.95	0.224	3.86	0.942	0.984	0.292
BHVO-2G						4.04	1220	16800	20.4	13.5	13.6	30.6	4.17	19.4	4.49	1.71	4.93	0.737	4.21	0.796	1.89	0.261	1.72	0.227	3.89	1.02	1.05	0.394
BHVO-2G						3.67	1240	17300	19.8	12.6	12.8	30.8	4.00	19.4	4.57	1.74	4.89	0.698	4.50	0.723	1.88	0.245	1.64	0.256	3.66	0.876	1.02	0.320
BHVO-2G						4.27	1200	17200	20.2	13.2	12.8	31.0	4.13	19.9	4.75	1.88	5.39	0.739	4.30	0.774	2.01	0.254	1.90	0.221	3.79	0.938	0.980	0.287
BHVO-2G						4.04	1280	16600	25.0	17.8	14.9	37.6	5.18	23.9	5.84	2.02	6.03	0.881	5.59	0.900	2.51	0.331	1.96	0.311	4.35	1.12	1.23	0.390
BHVO-2G						4.67	1240	16500	25.4	18.6	14.9	37.9	5.36	24.6	6.06	2.19	6.62	0.932	5.33	0.963	2.67	0.342	2.28	0.268	4.49	1.20	1.19	0.350
BHVO-2G						4.34	1270	16300	25.3	18.7	15.4	36.7	5.32	23.6	5.56	1.95	5.91	0.927	5.17	0.974	2.50	0.348	2.04	0.266	4.52	1.29	1.26	0.471
BIR-1G						2.74	159	5660	13.2	0.400	0.553	1.68	0.347	2.01	1.11	0.487	1.36	0.350	2.14	0.513	1.33	0.221	1.48	0.196	0.587	0.0281	0.0140	0.0207
BIR-1G						2.94	173	5760	12.8	0.405	0.555	1.70	0.266	2.18	0.937	0.394	1.66	0.261	2.32	0.593	1.32	0.239	1.26	0.193	0.517	0.0170	0.0312	0.0236
BIR-1G						2.18	207	5670	13.4	0.495	0.557	1.76	0.279	2.60	0.819	0.619	1.41	0.304	2.60	0.524	1.64	0.233	1.83	0.197	0.802		0.0457	0.0102
BIR-1G						3.83	342	5840	13.5	0.383	0.615	1.78	0.238	2.24	1.02	0.327	1.53	0.301	2.22	0.412	1.41	0.212	1.44	0.154	0.529	0.0333	0.0275	0.0344
BIR-1G						3.95	190	5490	12.6	0.502	0.632	1.65	0.266	1.53	0.815	0.487	1.43	0.325	2.50	0.540	1.44	0.219	1.40	0.222	0.521	0.0443	0.0111	0.0599
BIR-1G						3.07	0.0430	0.917	13.2	0.463	0.539	1.82	0.327	1.94	1.04	0.573	1.82	0.355	2.08	0.592	1.59	0.215	1.78	0.214	0.628	0.0316	0.0196
BIR-1G						2.76	0.0254	0.934	13.9	0.431	0.566	1.52	0.295	2.41	1.05	0.489	1.71	0.324	2.28	0.495	1.34	0.238	1.53	0.193	0.573	0.0430	0.0395	0.0188
BIR-1G						3.03	0.0263	0.914	12.8	0.423	0.592	1.67	0.301	2.41	1.09	0.514	1.92	0.294	2.17	0.471	1.47	0.185	1.48	0.237	0.488	0.0206		0.00725
BIR-1G						2.66	191	5740	11.7	0.308	0.532	1.49	0.302	1.76	1.06	0.507	1.58	0.258	2.04	0.445	1.35	0.163	1.26	0.190	0.475	0.0378	0.00632	0.0143
BIR-1G						2.84	146	5760	12.0	0.347	0.503	1.60	0.296	2.03	0.851	0.405	1.44	0.275	2.06	0.475	1.26	0.198	1.34	0.188	0.423	0.0230	0.0362	0.0170
BIR-1G						2.59	162	5850	11.5	0.404	0.450	1.56	0.267	1.80	0.921	0.481	1.50	0.264	1.79	0.459	1.34	0.178	1.28	0.231	0.626	0.0153	0.0317	0.0148
BIR-1G						2.72	190	5900	11.8	0.304	0.534	1.51	0.296	1.77	1.07	0.505	1.59	0.256	2.04	0.444	1.36	0.164	1.26	0.190	0.478	0.0383	0.00648	0.0146
BIR-1G						2.86	168	5630	14.6	0.571	0.524	1.91	0.347	2.23	1.18	0.562	1.86	0.335	2.23	0.574	1.80	0.242	1.53	0.281	0.745	0.0197	0.0385	0.0181
BIR-1G						2.93	197	5680	14.8	0.426	0.621	1.83	0.386	2.18	1.37	0.586	1.95	0.323	2.54	0.553	1.81	0.221	1.51	0.229	0.564	0.0491	0.00788	0.0178
BIR-1G						3.14	154	5650	15.0	0.479	0.583	1.96	0.385	2.47	1.08	0.477	1.74	0.351	2.53	0.585	1.68	0.258	1.57	0.226	0.499	0.0297	0.0443	0.0209

## Sheet: Table-S4 zircon Hf
Table S-4 In situ MC-LA-ICPMS zircon Hf isotopes for the I- and S-types granites, barren and rare-metal pegmatites from the Bailongshan deposit.
Sample	rock type	176Yb/177Hf	176Lu/177Hf	176Hf/177Hf	2SE	176Hf/177Hfi	eHf(0)	eHf(t)	2SE
14QW133 01	I-type granite	0.030261	0.001192	0.282708	1.5e-05	0.282703	-2.43662	2.39172	0.530719
14QW133 02	I-type granite	0.037666	0.001489	0.282666	1.3e-05	0.28266	-3.9651	0.862507	0.459956
14QW133 03	I-type granite	0.015694	0.000704	0.282749	1.5e-05	0.282746	-0.915736	3.91334	0.530719
14QW133 04	I-type granite	0.03354	0.001316	0.28264	1.3e-05	0.282635	-4.85941	-0.0322395	0.459956
14QW133 05	I-type granite	0.038437	0.001537	0.282638	1.4e-05	0.282632	-4.96228	-0.13515	0.495338
14QW133 06	I-type granite	0.0292644	0.00117605	0.28266	1.09987e-05	0.282655	-4.12503	0.702496	0.389146
14QW133 07	I-type granite	0.048256	0.001892	0.282615	1.6e-05	0.282607	-5.82727	-1.00056	0.5661
14QW133 08	I-type granite	0.036791	0.001464	0.282646	1.5e-05	0.28264	-4.66875	0.158519	0.530719
14QW133 09	I-type granite	0.043132	0.001714	0.282672	1.5e-05	0.282665	-3.78563	1.04206	0.530719
14QW133 10	I-type granite	0.039872	0.001614	0.282647	1.3e-05	0.28264	-4.65519	0.17208	0.459956
14QW133 11	I-type granite	0.0508	0.002	0.282679	1.2e-05	0.282671	-3.57966	1.24813	0.424575
14QW133 12	I-type granite	0.034614	0.00136	0.282633	1.4e-05	0.282627	-5.11336	-0.286309	0.495338
14QW133 13	I-type granite	0.03755	0.001528	0.282622	1.2e-05	0.282616	-5.52679	-0.699941	0.424575
14QW133 14	I-type granite	0.036062	0.001458	0.282676	1.4e-05	0.28267	-3.60695	1.22083	0.495338
14QW133 15	I-type granite	0.032448	0.001312	0.282679	1.1e-05	0.282674	-3.47963	1.34821	0.389194
14QW133 16	I-type granite	0.046477	0.00186	0.282681	1.5e-05	0.282673	-3.48858	1.33926	0.530719
14QW138 01	I-type granite	0.032785	0.001352	0.282698	1.4e-05	0.282692	-2.81353	2.01464	0.495338
14QW138 02	I-type granite	0.011566	0.000466	0.282472	1.3e-05	0.28247	-10.677	-5.85264	0.459956
14QW138 03	I-type granite	0.011238	0.000448	0.282541	1.4e-05	0.282539	-8.23426	-3.40872	0.495338
14QW138 04	I-type granite	0.01984	0.000775	0.282571	1.4e-05	0.282568	-7.22088	-2.39485	0.495338
14QW138 05	I-type granite	0.019006	0.000763	0.282536	1.4e-05	0.282533	-8.45688	-3.63145	0.495338
14QW138 06	I-type granite	0.017244	0.000651	0.282502	1.4e-05	0.282499	-9.64298	-4.81812	0.495338
14QW138 07	I-type granite	0.011461	0.000452	0.282541	1.3e-05	0.282539	-8.23485	-3.4093	0.459956
14QW138 08	I-type granite	0.017813	0.000683	0.282596	1.5e-05	0.282593	-6.3234	-1.49693	0.530719
14QW138 09	I-type granite	0.013327	0.000526	0.282581	1.2e-05	0.282579	-6.83104	-2.00481	0.424575
14QW138 10	I-type granite	0.012311	0.000516	0.282464	1.1e-05	0.282462	-10.9672	-6.14297	0.389194
14QW138 11	I-type granite	0.009996	0.000428	0.282508	9e-06	0.282506	-9.39837	-4.57339	0.318431
14QW138 12	I-type granite
14QW138 13	I-type granite	0.017385	0.000688	0.282578	1.3e-05	0.282575	-6.96068	-2.13452	0.459956
14QW138 14	I-type granite	0.018016	0.000737	0.282544	1.4e-05	0.282541	-8.17019	-3.34461	0.495338
14QW138 15	I-type granite	0.097625	0.004064	0.282538	1.1e-05	0.282521	-8.86611	-4.04087	0.389194
14QW138 16	I-type granite	0.0282	0.00109	0.282565	1.4e-05	0.282561	-7.47887	-2.65296	0.495338
14QW138 17	I-type granite	0.053882	0.001974	0.28253	1.4e-05	0.282522	-8.84515	-4.0199	0.495338
145QW145 01	S-type granite	0.010205	0.000344	0.282438	1.2e-05	0.282437	-11.8594	-7.25537	0.424566
145QW145 02	S-type granite	0.00483643	0.000167221	0.282446	8.78311e-06	0.282446	-11.5374	-6.9333	0.310751
145QW145 03	S-type granite	0.0269901	0.00114325	0.282744	1.41318e-05	0.28274	-1.13784		0.49999
145QW145 04	S-type granite	0.011967	0.000433	0.282406	1.1e-05	0.282404	-13.0034	-8.39991	0.389185
145QW145 05	S-type granite	0.0046426	0.000159385	0.282499	1.16768e-05	0.282498	-9.68676	-5.08175	0.413132
145QW145 07	S-type granite	0.004002	0.000132	0.282424	1.3e-05	0.282423	-12.3251	-7.72127	0.459946
145QW145 08	S-type granite	0.010011	0.000355	0.282455	1.2e-05	0.282454	-11.2597	-6.65543	0.424566
145QW145 09	S-type granite	0.013656	0.00045	0.282413	1.2e-05	0.282411	-12.7582	-8.1546	0.424566
145QW145 10	S-type granite	0.028323	0.00104	0.282681	1.2e-05	0.282677	-3.36247		0.424566
145QW145 11	S-type granite	0.011842	0.000378	0.28244	1.1e-05	0.282439	-11.7934	-7.18933	0.389185
145QW145 12	S-type granite	0.010541	0.000363	0.28238	1.4e-05	0.282379	-13.9131	-9.31008	0.495327
145QW145 13	S-type granite	0.02307	0.000976	0.282478	1.3e-05	0.282474	-10.5325	-5.9279	0.459946
DHLT3-15	S-type granite	0.000633	0.024648	0.282376	8e-06	0.282279	-17.4248	-12.8233	0.283044
DHLT3-20	S-type granite	0.001194	0.041673	0.282415	8e-06	0.282251	-18.4082	-13.8072	0.283044
DHLT3-25	S-type granite	0.000483	0.013544	0.282457	8e-06	0.282404	-13.0193	-8.41583	0.283044
DHLT3-31	S-type granite	0.000492	0.015454	0.282517	7e-06	0.282456	-11.1625	-6.55818	0.247663
DHLT3-33	S-type granite	0.000554	0.016068	0.282449	1.1e-05	0.282386	-13.6525	-9.0493	0.389185
DHLT3-39	S-type granite	0.000535	0.015331	0.282476	1.1e-05	0.282416	-12.5954	-7.9917	0.389185
DHLT3-46	S-type granite	0.001085	0.040326	0.282489	7e-06	0.282331	-15.6043	-11.002	0.247663
BLS-10-H1	S-type granite	0.0107164	0.000393486	0.282275	1.78284e-05	0.282274	-17.6133	-13.012	0.630777
BLS-10-H3	S-type granite	0.0375886	0.00136794	0.282406	1.82094e-05	0.282401	-13.1344	-8.53098	0.644257
BLS-10-H4	S-type granite	0.0406485	0.00157775	0.282503	1.70536e-05	0.282497	-9.72184	-5.11686	0.603366
BLS-10-H5	S-type granite	0.0269964	0.00101658	0.282508	1.68962e-05	0.282504	-9.48534	-4.88024	0.597795
BLS-10-H6	S-type granite	0.0251264	0.000961817	0.282444	1.89972e-05	0.282441	-11.717	-7.11298	0.672131
BLS-10-H7	S-type granite	0.0180998	0.0006406	0.282392	2.07002e-05	0.282389	-13.5323	-8.92906	0.732384
BLS-10-H8	S-type granite	0.0359178	0.00130025	0.282416	2.71574e-05	0.282411	-12.7781	-8.17448	0.960841
BLS-10-H9	S-type granite	0.064342	0.00232248	0.282337	3.46416e-05	0.282328	-15.7134	-11.1112	1.22564
BLS-46-H1	barren pegmatite	0.00120379	4.58124e-05	0.282447	8.01026e-06	0.282447	-11.4857	-6.88154	0.283407
BLS-46-H2	barren pegmatite	0.0260256	0.000904919	0.282451	1.06766e-05	0.282448	-11.4744	-6.8702	0.377743
BLS-46-H3	barren pegmatite	0.00111598	3.78542e-05	0.282421	8.63383e-06	0.28242	-12.4327	-7.82897	0.305469
BLS-46-H4	barren pegmatite	0.00510513	0.000171701	0.282427	1.25713e-05	0.282427	-12.2141	-7.61029	0.444778
BLS-46-H5	barren pegmatite	0.000914117	2.91064e-05	0.282431	1.07377e-05	0.282431	-12.0757	-7.47175	0.379904
BLS-46-H6	barren pegmatite	0.00422508	0.000179178	0.282424	9.93284e-06	0.282423	-12.3474	-7.74365	0.351429
BLS17-41-H1	barren pegmatite	0.0123163	0.000371034	0.282499	1.34964e-05	0.282498	-9.69583	-5.09083	0.477511
BLS17-41-H2	barren pegmatite	0.0183052	0.000514779	0.282493	1.79894e-05	0.282491	-9.94091	-5.33602	0.636474
BLS17-41-H3	barren pegmatite	0.031184	0.00102993	0.282455	1.54414e-05	0.282451	-11.356	-6.7518	0.546322
BLS17-41-H4	barren pegmatite	0.0169369	0.000549866	0.282466	1.85638e-05	0.282464	-10.8813	-6.27685	0.656796
BLS17-41-H5	barren pegmatite	0.0369901	0.00119807	0.282403	1.25195e-05	0.282399	-13.2026	-8.59919	0.442945
BLS17-41-H6	barren pegmatite	0.0126319	0.000388393	0.282469	1.37121e-05	0.282468	-10.7613	-6.15678	0.485139
BLS17-24-H1	rare-metal pegmatite	0.0114248	0.000305449	0.282473	9.64709e-06	0.282472	-10.6179	-6.01331	0.341319
BLS17-24-H2	rare-metal pegmatite	0.00329045	9.78062e-05	0.28247	9.2702e-06	0.28247	-10.6809	-6.07633	0.327984
BLS17-24-H3	rare-metal pegmatite	0.00352608	9.38197e-05	0.282442	1.17904e-05	0.282442	-11.6823	-7.07817	0.41715
BLS17-24-H4	rare-metal pegmatite	0.00432306	0.000125832	0.282465	1.60209e-05	0.282464	-10.8841	-6.27962	0.566827
BLS17-24-H5	rare-metal pegmatite	0.0050022	0.000147585	0.282477	1.34528e-05	0.282476	-10.4634	-5.8588	0.475968
BLS17-24-H6	rare-metal pegmatite	0.00276225	7.47395e-05	0.282487	8.82026e-06	0.282487	-10.074	-5.4692	0.312065
BLS17-24-H7	rare-metal pegmatite	0.00234529	6.84336e-05	0.282471	1.52089e-05	0.282471	-10.6482	-6.04359	0.538098
BLS17-24-H8	rare-metal pegmatite	0.00382141	0.000102573	0.282469	1.65371e-05	0.282469	-10.7293	-6.12476	0.58509
BLS17-24-H9	rare-metal pegmatite	0.00461552	0.000115584	0.282489	9.34239e-06	0.282489	-10.0211	-5.41623	0.330538
Zircon standards
GJ-1		0.00648389	0.000251074	0.282026	1.42212e-05
GJ-1		0.0065342	0.000251395	0.28201	1.30227e-05
GJ-1		0.00630696	0.000250875	0.282029	1.32225e-05
GJ-1		0.0063559	0.000251283	0.282004	1.34915e-05
GJ-1		0.00640418	0.000250611	0.282018	1.42816e-05
GJ-1		0.00641971	0.000251669	0.282008	1.34102e-05
GJ-1		0.00629096	0.000250637	0.282006	1.35872e-05
GJ-1		0.00636249	0.000253604	0.282025	1.33428e-05
GJ-1		0.00638765	0.000254304	0.282013	1.29353e-05
GJ-1		0.00643748	0.000255645	0.282004	1.3376e-05
GJ-1		0.00659887	0.000247005	0.282014	1.36112e-05
GJ-1		0.00657813	0.000246515	0.282007	1.3921e-05
Plesovice		0.00278001	6.89709e-05	0.282471	1.23025e-05
Plesovice		0.00193346	4.75254e-05	0.282485	1.24084e-05
Plesovice		0.00397369	9.58979e-05	0.282479	1.21121e-05
Plesovice		0.00577936	0.000145841	0.282477	1.17668e-05
Plesovice		0.00289718	7.08479e-05	0.282472	1.41068e-05
Plesovice		0.00381876	0.000104175	0.282484	1.60874e-05
Plesovice		0.00270829	7.458e-05	0.282484	1.65999e-05
Plesovice		0.00158809	4.34141e-05	0.282472	1.56741e-05
Plesovice		0.00435843	0.000125879	0.282466	1.70242e-05
Plesovice		0.0052949	0.000132929	0.28249	1.49484e-05
Plesovice		0.0072965	0.000187353	0.282472	1.47442e-05
Plesovice		0.00652619	0.000165887	0.282484	1.33701e-05
Plesovice		0.00617175	0.000156653	0.282481	1.49943e-05
Plesovice		0.00754915	0.000194609	0.282475	1.32197e-05
Plesovice		0.00574387	0.000149696	0.282476	1.39245e-05
Plesovice		0.00583799	0.000143566	0.28248	1.31985e-05
Plesovice		0.00625954	0.000155637	0.282489	1.52887e-05
Plesovice		0.00258481	6.49338e-05	0.282467	1.30301e-05
Plesovice		0.00241765	6.14648e-05	0.282484	1.1677e-05
Plesovice		0.00300546	7.41464e-05	0.282472	1.21225e-05
Plesovice		0.00273832	6.92176e-05	0.282483	1.16459e-05
Plesovice		0.00310203	7.52617e-05	0.282473	1.12028e-05
Plesovice		0.00271835	6.8726e-05	0.282483	1.32978e-05
Plesovice		0.00316671	7.61836e-05	0.282473	1.30583e-05
Plesovice		0.00378132	8.84522e-05	0.282481	1.28526e-05
Plesovice		0.0057821	0.000145297	0.282475	1.24985e-05
Plesovice		0.00234468	5.90758e-05	0.282486	1.12824e-05
Plesovice		0.00712656	0.000184103	0.28247	1.13191e-05
Plesovice		0.00681148	0.000175796	0.282474	1.48579e-05
Plesovice		0.00476777	0.000120403	0.282482	1.38272e-05
Plesovice		0.00408811	0.000100899	0.282487	1.43522e-05
Plesovice		0.00447244	0.000109138	0.282469	1.47356e-05
Plesovice		0.00517999	0.000135518	0.28247	1.26774e-05
Plesovice		0.00477654	0.000124688	0.282486	1.29165e-05
Plesovice		0.00462682	0.000121369	0.282481	1.28939e-05
Plesovice		0.00444092	0.000118515	0.282475	1.28669e-05
Plesovice		0.00538404	0.000141088	0.282479	1.14703e-05
Plesovice		0.00545691	0.000142579	0.282477	1.17721e-05
Plesovice		0.00425293	0.000111315	0.282473	1.15462e-05
Plesovice		0.00483403	0.000126274	0.282483	1.19549e-05
Plesovice		0.0041433	0.00010675	0.282474	1.1577e-05
Plesovice		0.00548268	0.000139336	0.282482	1.10355e-05
Plesovice		0.00562943	0.000144659	0.282477	1.24916e-05
Plesovice		0.00415108	0.000107787	0.282479	1.22204e-05
Plesovice		0.00606228	0.000156153	0.282481	1.1556e-05
Plesovice		0.00486489	0.000125681	0.282475	1.20938e-05
Plesovice		0.00467879	0.000124334	0.282488	1.30122e-05
Plesovice		0.0051528	0.000137312	0.282468	1.28536e-05

## Sheet: Table-S5 apatite Nd
Table S-5 In situ MC-LA-ICPMS apatite Nd isotopes for the I- and S-types granites, barren and rare-metal pegmatites from the Bailongshan deposit.
Analyse spot	Sample Name	rock type	143Nd/144Nd	2SE	145Nd/144Nd	2SE	147Sm/144Nd	2SE	I-147Sm(V)	I-146Nd(V)	εNd(t)
OCT01A001	MAD		0.511348	2.95874e-05	0.348435	1.48364e-05	0.0817778	2.97738e-05	0.229126	1.94075
OCT01A002	MAD		0.511339	1.46443e-05	0.348409	1.19524e-05	0.0817278	2.97245e-05	0.225316	1.91013
OCT01A003	Durango		0.512487	2.28623e-05	0.348438	1.11386e-05	0.0786713	3.39444e-05	0.180779	1.59024
OCT01A004	Durango		0.512487	2.08693e-05	0.348418	1.22765e-05	0.0781131	4.48584e-05	0.183363	1.62727
OCT01A005	MAD		0.511353	1.78218e-05	0.348427	9.85507e-06	0.0817238	4.40493e-05	0.233995	1.97796
OCT01A006	MAD		0.51134	2.04433e-05	0.348402	1.0125e-05	0.0818847	4.41069e-05	0.232582	1.96741
OCT01A007	L1536-BLS-10-01	S-type granite	0.512162	2.95789e-05	0.348441	1.34073e-05	0.234817	0.0014824	0.370678	1.07009	-10.3029
OCT01A008	L1536-BLS-10-02	S-type granite	0.512175	2.72628e-05	0.348425	1.45416e-05	0.238759	0.00013811	0.388615	1.12563	-10.1568
OCT01A009	L1536-BLS-10-03	S-type granite	0.512145	2.49702e-05	0.348407	1.57774e-05	0.241561	0.000318791	0.390716	1.11955	-10.8351
OCT01A010	L1536-BLS-10-04	S-type granite	0.512169	2.68244e-05	0.348419	1.49439e-05	0.245843	0.000143396	0.396066	1.11692	-10.4718
OCT01A011	L1536-BLS-10-05	S-type granite	0.512185	2.73972e-05	0.348413	1.23816e-05	0.2417	0.000160302	0.425148	1.21736	-10.0386
OCT01A013	L1536-BLS-10-07	S-type granite	0.512166	2.41794e-05	0.34843	1.69032e-05	0.239662	0.000132851	0.364436	1.05459	-10.3665
OCT01A014	L1536-BLS-10-08	S-type granite	0.512181	3.09191e-05	0.348423	1.61066e-05	0.244682	0.000234959	0.342664	0.969245	-10.2103
OCT01A015	L1536-BLS-10-09	S-type granite	0.512162	2.11044e-05	0.348428	1.4874e-05	0.2374	0.000131283	0.378131	1.10474	-10.3878
OCT01A016	L1536-BLS-10-10	S-type granite	0.51217	2.58071e-05	0.348414	1.69668e-05	0.240584	0.000893352	0.363607	1.05113	-10.319
OCT01A017	MAD		0.511346	1.74327e-05	0.348425	1.06495e-05	0.0815985	4.29799e-05	0.226541	1.91879
OCT01A018	MAD		0.511353	1.80468e-05	0.348406	1.10757e-05	0.0819941	4.65743e-05	0.240976	2.025
OCT01A019	L1536-BLS-10-11	S-type granite	0.512141	2.4835e-05	0.348414	1.20517e-05	0.232808	0.00196258	0.353341	1.03971	-10.6745
OCT01A020	L1536-BLS-10-12	S-type granite	0.512168	3.11181e-05	0.348406	1.71339e-05	0.243948	0.000205849	0.316332	0.897291	-10.4385
OCT01A029	MAD		0.511361	1.67783e-05	0.348416	1.08886e-05	0.0818849	3.3694e-05	0.261017	2.20741
OCT01A030	MAD		0.511359	1.54529e-05	0.348419	1.09601e-05	0.0819309	3.41666e-05	0.242169	2.04427
OCT01A032	L1536-14QW145-01	S-type granite	0.5123	2.59725e-05	0.348404	1.43425e-05	0.336745	0.000398352	0.501628	1.02462	-10.3533
OCT01A033	L1536-14QW145-02	S-type granite	0.512269	2.77777e-05	0.348453	1.66762e-05	0.335327	0.00265979	0.514802	1.07354	-10.9262
OCT01A034	L1536-14QW145-03	S-type granite	0.512257	2.06274e-05	0.348433	1.10212e-05	0.293083	0.00661925	0.685277	1.66597	-10.0175
OCT01A035	L1536-14QW145-04	S-type granite	0.5123	2.2446e-05	0.348426	1.29858e-05	0.320951	0.00121169	0.526755	1.13667	-9.93551
OCT01A036	L1536-14QW145-05	S-type granite	0.512324	2.54189e-05	0.348409	1.475e-05	0.335669	0.00282956	0.566493	1.16427	-9.84822
OCT01A037	L1536-14QW145-06	S-type granite	0.512001	2.81427e-05	0.348429	8.89034e-06	0.12973	0.00132439	1.96726	10.5579	-10.6322
OCT01A038	L1536-14QW145-07	S-type granite	0.512294	2.64849e-05	0.3484	1.44762e-05	0.33796	0.0020031	0.455625	0.936496	-10.501
OCT01A040	MAD		0.511332	1.8127e-05	0.348418	1.02974e-05	0.0816797	3.09366e-05	0.234017	1.98388
OCT01A041	MAD		0.511339	1.6998e-05	0.348407	9.76869e-06	0.0817051	3.10021e-05	0.228606	1.93722
OCT01A049	MAD		0.511327	2.16459e-05	0.348413	1.00232e-05	0.0818755	2.22429e-05	0.220526	1.86986
OCT01A050	MAD		0.511349	1.79063e-05	0.348417	1.10969e-05	0.0817311	2.82134e-05	0.224779	1.90932
OCT01A051	L1537-BLS-49-01	barren pegmatite	0.512228	3.68574e-05	0.348412	2.17739e-05	0.244413	0.00018178	0.182451	0.517789	-9.27799
OCT01A052	L1537-BLS-49-02	barren pegmatite	0.512198	3.50259e-05	0.348416	2.19918e-05	0.242598	0.000249887	0.195928	0.559006	-9.81091
OCT01A055	L1537-BLS-49-05	barren pegmatite	0.512369	2.92532e-05	0.348412	1.55158e-05	0.384252	0.00048753	0.561859	1.0173	-10.2907
OCT01A056	L1537-BLS-49-06	barren pegmatite	0.512236	2.59783e-05	0.348429	1.34695e-05	0.292293	8.24367e-05	0.426714	1.01402	-10.4023
OCT01A057	L1537-BLS-49-07	barren pegmatite	0.512228	2.45112e-05	0.348414	1.5759e-05	0.274471	0.000803845	0.406711	1.02796	-10.094
OCT01A058	L1537-BLS-49-08	barren pegmatite	0.512323	3.16233e-05	0.348435	1.63456e-05	0.35199	0.000196363	0.392728	0.775299	-10.3075
OCT01A059	L1537-BLS-49-09	barren pegmatite	0.512093	3.12641e-05	0.348378	3.33644e-05	0.197761	0.00014144	0.0686173	0.24062	-10.6712
OCT01A061	MAD		0.511356	1.69723e-05	0.348413	1.24555e-05	0.0819372	2.93779e-05	0.236534	2.00203
OCT01A062	MAD		0.511361	1.66064e-05	0.348417	1.18908e-05	0.0817951	3.39098e-05	0.232942	1.97623
OCT01A063	L1537-BLS-49-11	barren pegmatite	0.512348	3.0899e-05	0.348402	2.09184e-05	0.320795	0.000226623	0.322793	0.700104	-8.9945
OCT01A065	L1537-BLS-49-13	barren pegmatite	0.512312	3.11125e-05	0.3484	1.35043e-05	0.310158	0.000109954	0.416282	0.933427	-9.40399
OCT01A067	L1537-14QW138-01	I-type granite	0.51247	3.79035e-05	0.348417	6.13034e-05	0.314113	0.000742679	0.0586416	0.13019	-6.5883
OCT01A068	L1537-14QW138-02	I-type granite	0.512358	3.3372e-05	0.348393	2.02305e-05	0.271281	0.00015313	0.221776	0.568199	-7.57062
OCT01A069	L1537-14QW138-03	I-type granite	0.512412	2.64321e-05	0.348407	1.74454e-05	0.281583	0.000305102	0.301915	0.743974	-6.80226
OCT01A071	L1537-14QW138-05	I-type granite	0.512426	3.11358e-05	0.348428	2.20291e-05	0.275423	0.000688234	0.281717	0.709973	-6.35397
OCT01A072	L1537-14QW138-06	I-type granite	0.512322	2.12413e-05	0.348419	1.17518e-05	0.218506	9.64491e-05	0.448023	1.42355	-6.78431
OCT01A073	MAD		0.511337	1.80821e-05	0.348404	1.16903e-05	0.0816961	5.38993e-05	0.217958	1.85441
OCT01A074	MAD		0.511341	1.6313e-05	0.348436	1.11526e-05	0.0818456	5.31183e-05	0.227887	1.93514
OCT01A075	L1537-14QW138-07	I-type granite	0.512282	3.16863e-05	0.348424	1.81768e-05	0.262366	0.00085658	0.280556	0.747042	-8.79564
OCT01A076	L1537-14QW138-08	I-type granite	0.51232	2.94277e-05	0.348438	1.79551e-05	0.26618	0.000817663	0.294168	0.769356	-8.14942
OCT01A085	Durango		0.512483	2.05299e-05	0.348425	1.08125e-05	0.0794615	5.98924e-05	0.192096	1.67819
OCT01A086	Durango		0.512473	2.22835e-05	0.348426	1.3156e-05	0.0793558	6.097e-05	0.202194	1.77134
OCT01A087	MAD		0.511348	2.02489e-05	0.348415	9.77849e-06	0.0818	2.25133e-05	0.232375	1.9672
OCT01A088	MAD		0.51134	1.74963e-05	0.348391	1.11935e-05	0.0812303	1.91264e-05	0.20926	1.78343
OCT01B001	MAD		0.511364	1.8232e-05	0.348421	1.47516e-05	0.0821127	5.15297e-05	0.235961	1.99691
OCT01B002	MAD		0.511351	1.95155e-05	0.34841	1.09268e-05	0.081765	4.86336e-05	0.22746	1.92962
OCT01B003	Durango		0.512467	2.54299e-05	0.348403	1.39223e-05	0.0794022	6.26077e-05	0.189407	1.65875
OCT01B004	Durango		0.512488	1.71587e-05	0.348437	9.91241e-06	0.0795181	5.21803e-05	0.195435	1.71052
OCT01B005	MAD		0.511326	2.06526e-05	0.348407	1.27275e-05	0.0818602	4.56602e-05	0.226027	1.92346
OCT01B006	MAD		0.511348	1.92506e-05	0.348421	1.26009e-05	0.0817383	3.56753e-05	0.227289	1.93682
OCT01B007	L1538-14QW143-01	S-type granite	0.512177	2.58314e-05	0.348428	1.43446e-05	0.231232	0.000328643	0.35588	1.0754	-9.92567
OCT01B008	L1538-14QW143-02	S-type granite	0.512074	1.98711e-05	0.348413	8.16956e-06	0.137512	0.00115955	1.25944	6.48251	-9.42008
OCT01B009	L1538-14QW143-03	S-type granite	0.512108	2.51431e-05	0.348392	1.21964e-05	0.204941	0.00549972	0.416069	1.49815	-10.573
OCT01B010	L1538-14QW143-04	S-type granite	0.512179	2.26972e-05	0.348404	1.19785e-05	0.207311	0.0019641	0.393239	1.37544	-9.24303
OCT01B011	L1538-14QW143-05	S-type granite	0.512153	2.89903e-05	0.348413	1.64968e-05	0.236112	0.000317266	0.293017	0.862935	-10.5269
OCT01B012	L1538-14QW143-06	S-type granite	0.512167	2.43527e-05	0.348393	1.46397e-05	0.229346	0.000579484	0.320375	0.971605	-10.0624
OCT01B015	MAD		0.511355	1.75777e-05	0.348416	1.14243e-05	0.0814802	6.61875e-05	0.206895	1.76432
OCT01B016	MAD		0.511343	1.6402e-05	0.348419	1.00177e-05	0.0817895	6.61844e-05	0.227191	1.93166
OCT01B027	MAD		0.511359	1.92783e-05	0.348413	9.77993e-06	0.0815527	5.36497e-05	0.226985	1.93054
OCT01B028	MAD		0.511338	1.61612e-05	0.348412	1.10369e-05	0.0820418	5.04596e-05	0.235487	1.9898
OCT01B039	MAD		0.511359	1.41114e-05	0.348415	1.182e-05	0.0819224	4.0729e-05	0.240955	2.04533
OCT01B040	MAD		0.511328	1.47147e-05	0.348417	1.19588e-05	0.0819065	3.46002e-05	0.232217	1.96859
OCT01B042	L1538-14QW136-01	I-type granite	0.512241	2.09398e-05	0.348405	1.18348e-05	0.139938	0.000147545	0.306458	1.54008	-6.1573
OCT01B043	L1538-14QW136-02	I-type granite	0.512292	2.19344e-05	0.348398	1.68307e-05	0.162472	0.000744013	0.280277	1.20423	-5.80102
OCT01B044	L1538-14QW136-03	I-type granite	0.512243	1.60259e-05	0.348418	1.09271e-05	0.134304	0.000225638	0.423347	2.1942	-5.95213
OCT01B045	L1538-14QW136-04	I-type granite	0.512291	2.02579e-05	0.348417	1.15057e-05	0.152519	0.000928305	0.426409	1.93781	-5.52716
OCT01B046	L1538-14QW136-05	I-type granite	0.512248	1.64431e-05	0.348408	9.77713e-06	0.134724	0.000106623	0.382903	1.97121	-5.87025
OCT01B047	L1538-14QW136-06	I-type granite	0.512291	2.64565e-05	0.348399	1.35796e-05	0.146779	0.000228614	0.2346	1.11103	-5.37365
OCT01B048	L1538-14QW136-07	I-type granite	0.512273	2.31892e-05	0.348417	1.26075e-05	0.150785	0.000702068	0.291792	1.34079	-5.83365
OCT01B049	L1538-14QW136-08	I-type granite	0.51227	1.86101e-05	0.348415	1.14868e-05	0.142117	0.000582396	0.395969	1.91845	-5.64861
OCT01B050	L1538-14QW136-09	I-type granite	0.512258	2.03655e-05	0.348407	1.27684e-05	0.136447	0.00036222	0.228562	1.16714	-5.71374
OCT01B051	MAD		0.511355	1.69634e-05	0.348413	1.04693e-05	0.0818493	4.37803e-05	0.236038	2.00441
OCT01B052	MAD		0.511348	1.9503e-05	0.34842	9.6972e-06	0.081797	3.93165e-05	0.246908	2.0959
OCT01B053	L1538-14QW133-01	I-type granite	0.512385	2.32162e-05	0.348398	1.29602e-05	0.205684	0.00267615	0.380642	1.31387	-5.18654
OCT01B054	L1538-14QW133-02	I-type granite	0.512339	2.31869e-05	0.348412	1.3997e-05	0.203645	0.00227543	0.363302	1.24482	-6.03879
OCT01B055	L1538-14QW133-03	I-type granite	0.512301	2.34921e-05	0.34841	1.24564e-05	0.1667	0.000724063	0.303113	1.27588	-5.74416
OCT01B056	L1538-14QW133-04	I-type granite	0.512364	2.73218e-05	0.348409	1.54275e-05	0.196609	0.00290564	0.279363	1.00695	-5.34725
OCT01B057	L1538-14QW133-05	I-type granite	0.512347	1.82887e-05	0.348405	1.03134e-05	0.1798	0.00306621	0.450576	1.68027	-5.19693
OCT01B058	L1538-14QW133-06	I-type granite	0.512361	2.05936e-05	0.348418	1.20147e-05	0.194846	0.00279799	0.386052	1.35335	-5.3465
OCT01B059	L1538-14QW133-07	I-type granite	0.51236	2.4666e-05	0.348405	9.95686e-06	0.203401	0.00284252	0.380582	1.24039	-5.62009
OCT01B060	L1538-14QW133-08	I-type granite	0.512366	2.20141e-05	0.348409	1.14708e-05	0.181134	0.00190986	0.384068	1.47317	-4.87139
OCT01B061	L1539-BLS17-41-01	barren pegmatite	0.512299	2.39225e-05	0.348386	1.48774e-05	0.276602	0.00135138	0.377322	0.940896	-8.75568
OCT01B062	L1539-BLS17-41-02	barren pegmatite	0.512289	2.80288e-05	0.348384	1.5719e-05	0.271902	0.00173222	0.346475	0.883528	-8.82284
OCT01B063	MAD		0.511365	1.8201e-05	0.348415	1.03375e-05	0.0832987	0.000399518	0.233486	1.9837
OCT01B064	MAD		0.511331	1.78946e-05	0.348424	1.04207e-05	0.0830787	0.000406206	0.237387	2.02127
OCT01B065	L1539-BLS17-41-03	barren pegmatite	0.512275	2.77339e-05	0.348446	1.51442e-05	0.260855	0.00204344	0.34136	0.919175	-8.79779
OCT01B066	L1539-BLS17-41-04	barren pegmatite	0.512245	2.80993e-05	0.348399	1.7325e-05	0.25958	0.0013933	0.318782	0.866691	-9.35694
OCT01B067	L1539-BLS17-41-05	barren pegmatite	0.512244	2.42916e-05	0.348419	1.48296e-05	0.251084	0.0012211	0.402749	1.1354	-9.15245
OCT01B068	L1539-BLS17-41-06	barren pegmatite	0.512223	3.42175e-05	0.348408	2.14973e-05	0.260625	0.00142026	0.293335	0.798154	-9.80653
OCT01B069	L1539-BLS17-41-07	barren pegmatite	0.512212	2.48746e-05	0.348432	1.20109e-05	0.269526	0.00177033	0.381206	0.987626	-10.2619
OCT01B070	L1539-BLS17-41-08	barren pegmatite	0.512236	2.77201e-05	0.348443	1.3264e-05	0.267939	0.00269667	0.400932	1.04507	-9.75875
OCT01B071	L1539-BLS17-41-09	barren pegmatite	0.512224	2.49069e-05	0.348399	1.41267e-05	0.259518	0.00129066	0.380519	1.04017	-9.76123
OCT01B072	L1539-BLS17-41-10	barren pegmatite	0.51225	3.00869e-05	0.348412	1.6315e-05	0.273648	0.00129052	0.326478	0.84483	-9.63668
OCT01B073	L1539-BLS17-41-11	barren pegmatite	0.512252	3.33131e-05	0.348443	1.61199e-05	0.257713	0.00128016	0.325495	0.894199	-9.17608
OCT01B075	MAD		0.511347	1.92313e-05	0.34841	1.092e-05	0.0821954	0.000395117	0.199116	1.72919
OCT01B076	MAD		0.51134	1.94984e-05	0.348421	1.18364e-05	0.0796675	0.000363449	0.169453	1.52369
OCT01B078	L1539-BLS17-24-02	rare-metal pegmatite	0.512198	3.41114e-05	0.348408	2.22322e-05	0.287944	0.00105832	0.24031	0.594045	-11.039
OCT01B081	L1539-BLS17-24-05	rare-metal pegmatite	0.512257	2.98501e-05	0.348406	1.74066e-05	0.306527	0.00117517	0.352836	0.818779	-10.382
OCT01B083	L1539-BLS17-24-07	rare-metal pegmatite	0.512303	2.58568e-05	0.348412	1.24588e-05	0.315872	0.00119646	0.462766	1.04349	-9.729
OCT01B084	L1539-BLS17-24-08	rare-metal pegmatite	0.51224	3.4375e-05	0.348439	2.07818e-05	0.323601	0.00116131	0.245006	0.538513	-11.1737
OCT01B086	L1539-14QW131-01	I-type granite	0.512365	2.67227e-05	0.348423	1.29993e-05	0.183151	0.00245767	0.309587	1.17571	-4.94758
OCT01B087	MAD		0.511365	1.40154e-05	0.348416	1.04478e-05	0.0813619	0.000136818	0.229253	1.97046
OCT01B088	MAD		0.511358	1.84167e-05	0.348404	1.0486e-05	0.0813729	0.000142188	0.227941	1.9593
OCT01B089	L1539-14QW131-02	I-type granite	0.512353	2.53977e-05	0.348427	1.58947e-05	0.188026	0.00135505	0.281692	1.0676	-5.32074
OCT01B090	L1539-14QW131-03	I-type granite	0.512354	2.26098e-05	0.348405	1.36317e-05	0.186602	0.00187549	0.380277	1.4248	-5.26706
OCT01B091	L1539-14QW131-04	I-type granite	0.512369	2.45226e-05	0.348413	1.40145e-05	0.206521	0.000932069	0.353437	1.24559	-5.53407
OCT01B092	L1539-14QW131-05	I-type granite	0.512434	2.42224e-05	0.348418	1.52154e-05	0.211541	0.00202041	0.26799	0.892325	-4.39479
OCT01B093	L1539-14QW131-06	I-type granite	0.512424	2.12329e-05	0.348425	1.2045e-05	0.230617	0.00159709	0.473724	1.4202	-5.12995
OCT01B094	L1539-14QW131-07	I-type granite	0.512331	2.51358e-05	0.348396	1.43649e-05	0.174611	0.00184024	0.305621	1.26851	-5.36923
OCT01B095	L1539-14QW131-08	I-type granite	0.512334	2.99881e-05	0.348402	1.60889e-05	0.20954	0.00252464	0.251423	0.822018	-6.30203
OCT01B096	Durango		0.512481	2.10375e-05	0.348419	1.08414e-05	0.0800475	0.000107146	0.187045	1.63598
OCT01B097	Durango		0.512463	2.51725e-05	0.34841	1.16834e-05	0.0802656	0.000118921	0.19571	1.70732
OCT01B098	MAD		0.511327	1.96097e-05	0.348413	1.0951e-05	0.082129	0.000104469	0.204383	1.74162
OCT01B099	MAD		0.511342	1.94538e-05	0.348427	1.03335e-05	0.0823457	0.000109215	0.208645	1.77656

## Sheet: Table-S6 WR Sr-Nd
Table S-6 Whole-rock Sr-Nd isotopic data for the I- and S-types granites from the Bailongshan deposit.
Sample	rock type	Rb	Sr	87Rb/86Sr	87Sr/86Sr(m)	1SE	87Sr/86Sr(i)	Sm	Nd	147Sm/144Nd	143Nd/144Nd(m)	1SE	εNd(t)
14QW130	I-type granitoid	215.3	161.7	3.84948	0.719	8.53e-06	0.706955	7.417	16.07	0.278863	0.512476	4e-06	-5.47083
14QW133	I-type granitoid	144.7	226	1.85109	0.7131	1.32e-05	0.707208	2.855	12.04	0.143271	0.512293	6e-06	-5.23213
14QW131	I-type granitoid	187.6	179.9	3.01488	0.7162	6.37e-06	0.706567	7.6	16.98	0.270429	0.512472	4e-06	-5.31191
14QW136	I-type granitoid	65.5	410.6	0.461202	0.7101	1.15e-05	0.708557	4.436	22.38	0.119759	0.512221	5e-06	-5.97668
14QW138	I-type granitoid	8.033	253.8	0.0915071	0.7112	9.35e-06	0.710714	0.679	2.928	0.140112	0.512227	6e-06	-6.43154
14QW138 duplicate	I-type granitoid	8.033	253.8	0.0915071	0.7111	9.46e-06	0.710714	0.679	2.928	0.140112	0.512228	5e-06	-6.41203
14QW143	S-type granite	294	57.49	14.7851				4.375	19.65	0.134522	0.512043	5e-06	-9.94493
14QW145	S-type granite	206.7	89.55	6.67334				5.042	23.47	0.129798	0.512037	6e-06	-9.93532
14QW145	S-type granite	206.7	89.55	6.67334				5.042	23.47	0.129798	0.51203	4e-06	-10.0719
DH01*	S-type granite	278	77.1	10.4246	0.747294	1.1e-05	0.716161	5.42	25.8	0.126928	0.512042	8e-06	-9.76075
DH02*	S-type granite	233	70.3	9.58229	0.75053	1.5e-05	0.721913	5.83	27	0.130462	0.512062	9e-06	-9.46519
DH03*	S-type granite	267	71.6	10.7812	0.749399	1e-05	0.717202	5.11	24.4	0.126535	0.512083	7e-06	-8.94999
DH04*	S-type granite	266	73.8	10.4206	0.74749	1.2e-05	0.716369	5.67	26.7	0.128307	0.512066	9e-06	-9.32932
DH05*	S-type granite	281	72.5	11.2056	0.748815	1.2e-05	0.71535	6.26	30.2	0.125241	0.512085	1.3e-05	-8.87625
DH06*	S-type granite	254	74.1	9.91024	0.748133	1.1e-05	0.718537	6.16	29.9	0.124477	0.51207	8e-06	-9.14851
DH07*	S-type granite	299	74.5	11.6034	0.75047	1.6e-05	0.715817	6.1	29	0.12709	0.512084	1.1e-05	-8.94536
DH08*	S-type granite	244	71.9	9.81137	0.750998	1.4e-05	0.721697	5.67	27	0.126881	0.511995	1e-05	-10.6768
DH09*	S-type granite	243	74.2	9.46828	0.745755	1e-05	0.717478	5.69	27.5	0.125014	0.512079	1.1e-05	-8.98727
DH10*	S-type granite	281	80.2	10.1298	0.747598	1e-05	0.717346	6.12	29	0.127506	0.512079	8e-06	-9.05412
DH11*	S-type granite	253	67.5	10.8364	0.753624	1e-05	0.721262	5.67	26.8	0.127828	0.512087	7e-06	-8.90662
Zhang, Q., Liu, Y., Wu, Z., Huang, H., Li, K., Zhou, Q., 2018. Late Triassic granites from the northwestern margin of the Tibetan Plateau, the Dahongliutan example: petrogenesis and tectonic implications for the evolution of the Kangxiwa Palaeo-Tethys. International Geology Review 61, 175-194.

## Sheet: Table-S7 age summary
Table S7 Compilation of age data for the pegmatite and related granite from the East Asia rare-metal pegmatite deposits.
Deposit	Sample	Rock type	Deposit type	Age	2σ	mineral	method	reference
Altai
Keketuohai	T1	pegmatite	Li-Be-Ta-Nb-Cs-Rb-Hf	220	9	zircon	U–Pb SHRIMP	Wang et al., 2007 OGR, 10.1016/j.oregeorev.2006.10.001
	T5	pegmatite	Li-Be-Ta-Nb-Cs-Rb-Hf	198	7	zircon	U–Pb SHRIMP	Wang et al., 2007 OGR, 10.1016/j.oregeorev.2006.10.001
	122/1	pegmatite	Li-Be-Ta-Nb-Cs-Rb-Hf	213	6	zircon	U–Pb SHRIMP	Wang et al., 2007 OGR, 10.1016/j.oregeorev.2006.10.001
	122/7	pegmatite	Li-Be-Ta-Nb-Cs-Rb-Hf	213	2	zircon	U–Pb SHRIMP	Wang et al., 2007 OGR, 10.1016/j.oregeorev.2006.10.001
	Y2	pegmatite	Li-Be-Ta-Nb-Cs-Rb-Hf	211	3.2	zircon	U–Pb LA-ICPMS	Chen et al., 2018 The Chinese Journal of Nonferrous Metals, 10.19476/j.ysxb.1004.0609.2018.09.15
	H2	pegmatite	Li-Be-Ta-Nb-Cs-Rb-Hf	212	1.8	zircon	U–Pb LA-ICPMS	Chen et al., 2018 The Chinese Journal of Nonferrous Metals, 10.19476/j.ysxb.1004.0609.2018.09.15
	Y4	pegmatite	Li-Be-Ta-Nb-Cs-Rb-Hf	214.9	2.1	zircon	U–Pb LA-ICPMS	Chen et al., 2018 The Chinese Journal of Nonferrous Metals, 10.19476/j.ysxb.1004.0609.2018.09.15
	Y5	pegmatite	Li-Be-Ta-Nb-Cs-Rb-Hf	212	4.1	zircon	U–Pb LA-ICPMS	Chen et al., 2018 The Chinese Journal of Nonferrous Metals, 10.19476/j.ysxb.1004.0609.2018.09.15
	M1-6	pegmatite	Li-Be-Ta-Nb-Cs-Rb-Hf	209.9	1.3	molybdenite	Re-Os	Liu et al., 2014 Ore Geology Reviews, 56, 209-219. doi: 10.1016/j.oregeorev.2013.08.020
	713-79	pegmatite	Li-Be-Ta-Nb-Cs-Rb-Hf	218	2	columbite	U–Pb LA-ICPMS	Che et al., 2015 Ore Geology Reviews, 65, 979-989. doi: https://doi.org/10.1016/j.oregeorev.2014.07.008.
	KKTH-3a	pegmatite	Li-Be-Ta-Nb-Cs-Rb-Hf	205.6	2.6	columbite	U–Pb LA-ICPMS	Wang et al., 2019 Acta Geologica Sinica
	W1	pegmatite	Li-Be-Ta-Nb-Cs-Rb-Hf	209.4	2.6	zircon	U–Pb LA-ICPMS	Yan et al., 2020 Acta Geoscientica Sinica
Kaluan
	KLP805	pegmatite	Li	216	2.6	zircon	U–Pb LA-ICPMS	Ma et al., 2015 Geochimica
	KLP806	pegmatite	Li	223.7	1.8	zircon	U–Pb LA-ICPMS	Ma et al., 2015 Geochimica
	KLP807	pegmatite	Li	221	5	zircon	U–Pb LA-ICPMS	Ma et al., 2015 Geochimica
	KLP650-1	pegmatite	Li	227.9	2.6	zircon	U–Pb LA-ICPMS	Ma et al., 2015 Geochimica
	KLP650-2	pegmatite	Li	211.3	2.4	zircon	U–Pb LA-ICPMS	Ma et al., 2015 Geochimica
	KLA803	pegmatite	Li	224.6	2.3	zircon	U–Pb LA-ICPMS	Ma et al., 2015 Geochimica
	802	pegmatite	Li	209.9	1.1	columbite	U–Pb LA-ICPMS	Feng et al., Minerals 2019, 9, 456; doi:10.3390/min9080456
	803	pegmatite	Li	197.4	1.3	columbite	U–Pb LA-ICPMS	Feng et al., Minerals 2019, 9, 456; doi:10.3390/min9080456
	805	pegmatite	Li	224.8	1.4	columbite	U–Pb LA-ICPMS	Feng et al., Minerals 2019, 9, 456; doi:10.3390/min9080456
	KLA2017-16-1	pegmatite	Li	201.5	12	zircon	U–Pb LA-ICPMS	Zhang et al., 2016 JAES
Azubai	ZZB01	pegmatite	Be	191.6	2.1	zircon	U–Pb LA-ICPMS	Zhang et al., 2016 JAES
Qiongkuer	JMK-09	pegmatite	Be	192	2.3	zircon	U–Pb LA-ICPMS	Ren et al., 2011 Acta Mineralogica Sinica
Kelumute	KLP-1	pegmatite	Li-Be-Nb-Ta	238.2	2	zircon	U–Pb LA-ICPMS	Lv et al., 2012 Lithos 2012, Pages 374-391
	KLP-2	pegmatite	Li-Be-Nb-Ta	233.5	3.7	zircon	U–Pb LA-ICPMS	Lv et al., 2012 Lithos 2012, Pages 374-391
	KLP-3	pegmatite	Li-Be-Nb-Ta	188.3	1.7	zircon	U–Pb LA-ICPMS	Lv et al., 2012 Lithos 2012, Pages 374-392
	KLP-5	pegmatite	Li-Be-Nb-Ta	218.8	1.9	zircon	U–Pb LA-ICPMS	Lv et al., 2012 Lithos 2012, Pages 374-393
	KLP-6	pegmatite	Li-Be-Nb-Ta	210.7	1.6	zircon	U–Pb LA-ICPMS	Lv et al., 2012 Lithos 2012, Pages 374-394
	FH08-11	pegmatite	Li-Be-Nb-Ta	202.9	1.6	zircon	U–Pb LA-ICPMS	Ren et al., 2011 Acta Mineralogica Sinica
		pegmatite	Li-Be-Nb-Ta	237	5	zircon	U–Pb LA-ICPMS	Ren et al., 2011 Acta Mineralogica Sinica
		pegmatite	Li-Be-Nb-Ta	196.9	4.5	zircon	U–Pb LA-ICPMS	Ren et al., 2011 Acta Mineralogica Sinica
		pegmatite	Li-Be-Nb-Ta	238.8	2.5	zircon	U–Pb LA-ICPMS	Ren et al., 2011 Acta Mineralogica Sinica
		pegmatite	Li-Be-Nb-Ta	204	4.1	zircon	U–Pb LA-ICPMS	Ren et al., 2011 Acta Mineralogica Sinica
Kuwei-Jiebiete	KWP-7	pegmatite	Be	200.2	1.9	zircon	U–Pb LA-ICPMS	Zhang et al., 2019 Mineral Deposit
	554	pegmatite	Be	197.3	1.3	zircon	U–Pb LA-ICPMS	Zhang et al., 2019 Mineral Deposit
	KWP-10	pegmatite	Be	194.2	1.8	zircon	U–Pb LA-ICPMS	Zhang et al., 2019 Mineral Deposit
	KWP-9	pegmatite	Be	192.9	1.5	zircon	U–Pb LA-ICPMS	Zhang et al., 2019 Mineral Deposit
Askartor	AKG06	pegmatite	Be-Mo-Nb	220.6	1.6	zircon	U–Pb LA-ICPMS	Yong et al., 202110.3389/feart.2021.646772
	QHA12	pegmatite	Be-Mo-Nb	228.7	7.1	molybdenite	Re-Os	Yong et al., 202110.3389/feart.2021.646772
	ASK-8	pegmatite	Be-Mo-Nb	218.2	3.9	zircon	U–Pb LA-ICPMS	Wang et al., 2015 Acta Petrologica Sinica
	ASK-10-17	pegmatite	Be-Mo-Nb	218.6	2.6	molybdenite	Re-Os	Wang et al., 2015 Acta Petrologica Sinica
Kalaerqis	JMK02	pegmatite	Li-Be-Ta-Nb	212.2	1.7	zircon	U–Pb LA-ICPMS	Ren et al., 2011 Acta Mineralogica Sinica
	QK02	pegmatite	Be-Ta-Nb	206.8	1.6	zircon	U–Pb LA-ICPMS	Ren et al., 2011 Acta Mineralogica Sinica
	HST-P	pegmatite	Be	198.5	2.5	zircon	U–Pb LA-ICPMS	Ren et al., 2011 Acta Mineralogica Sinica
	91	pegmatite	Li-Be-Ta-Nb	190.6	1.2	zircon	U–Pb LA-ICPMS	Ren et al., 2011 Acta Mineralogica Sinica
	JMK10-2	pegmatite	Be-Nb-Ta-Cs	212.2	1.7	zircon	U–Pb LA-ICPMS	Ren et al., 2011 Acta Mineralogica Sinica
	JMK10-A	pegmatite	Li-Be-Ta-Nb	199.1	1	zircon	U–Pb LA-ICPMS	Ren et al., 2011 Acta Mineralogica Sinica
	JMK09	pegmatite	Ta-Nb	192	2.3	zircon	U–Pb LA-ICPMS	Zhang et al., 2016
	QK10-2	pegmatite	Be-Ta-Nb	206.8	1.6	zircon	U–Pb LA-ICPMS	Ren et al., 2011 Acta Mineralogica Sinica
	QKE-2-1	pegmatite	Be-Ta-Nb	194.3	1.6	zircon	U–Pb LA-ICPMS	Zhou et al., 2018
Askartor	ASK-6	granite		219.2	2.9	zircon	U–Pb LA-ICPMS	Wang et al., 2015 Acta Petrologica Sinica
	ASK-1	granite		222.6	4.6	zircon	U–Pb LA-ICPMS	Wang et al., 2015 Acta Petrologica Sinica
	S4299-2	granite		218.7	4.9	zircon	U–Pb LA-ICPMS	Zhang et al., 2018 Mineral deposit
	AKG04	granite		247.5	2.2	zircon	U–Pb LA-ICPMS	Yong et al., 202110.3389/feart.2021.646772
	AKG05	granite		231.4	2	zircon	U–Pb LA-ICPMS	Yong et al., 202110.3389/feart.2021.646772
Aral	R	granite		211.4	1.6	zircon	U–Pb LA-ICPMS	Liu et al., 2014, OGR
Russian Gorny Altai
Kalguty	68	granite		207.5	1.7	zircon	U–Pb SHRIMP	Gusev Geology of Ore Deposits, 2011, Vol. 53, No. 3, pp. 248–263
	678	granite		210.1	2.9	zircon	U–Pb SHRIMP	Gusev Geology of Ore Deposits, 2011, Vol. 53, No. 3, pp. 248–263
	678-2	rhyolite		200.8	1.1	zircon	U–Pb SHRIMP	Gusev Geology of Ore Deposits, 2011, Vol. 53, No. 3, pp. 248–263
	683-11	granite porphyry		204	2	zircon	U–Pb SHRIMP	Gusev Geology of Ore Deposits, 2011, Vol. 53, No. 3, pp. 248–263
	10136	two-mica leucogranite		195	2.7	zircon	U–Pb SHRIMP	Gusev Geology of Ore Deposits, 2011, Vol. 53, No. 3, pp. 248–263
	10137	two-mica leucogranite		193.1	2.1	zircon	U–Pb SHRIMP	Gusev Geology of Ore Deposits, 2011, Vol. 53, No. 3, pp. 248–263
Alakha		granite		199	1	zircon	U–Pb SHRIMP	Russian Geology and Geophysics, 39, 909-925
		granite		195	3	zircon	U–Pb SHRIMP	Russian Geology and Geophysics, 39, 909-925
		granite		195	3	zircon	U–Pb SHRIMP	Russian Geology and Geophysics, 39, 909-925
		granite		193	2	zircon	U–Pb SHRIMP	Russian Geology and Geophysics, 39, 909-925
Tianshan
Zhangbaoshan	19KH–231	Leucogranite	Rb	250.5	3.4	zircon	U–Pb LA-ICPMS	Zhi et al., 2021 10.3389/feart.2021.682720
	BST-27	Leucogranite	Rb	248	6.2	zircon	U–Pb LA-ICPMS	Zhi et al., 2021 10.3389/feart.2021.682720
Shadong	SD33	granite	W	239	4	zircon	U–Pb LA-ICPMS	Chen et al., 2018 Journal of Earth Science, Vol. 29, No. 1, p. 114–129
Jingerquan	J4	granite	Li	220.2	2.8	zircon	U–Pb LA-ICPMS	Li et al., 2020 Geochimica
	J7	granite	Li	223.2	2.6	zircon	U–Pb LA-ICPMS	Li et al., 2020 Geochimica
	J12	granite	Li	223.6	3	zircon	U–Pb LA-ICPMS	Li et al., 2020 Geochimica
	J17	pegmatite	Li	218	3.6	zircon	U–Pb LA-ICPMS	Li et al., 2020 Geochimica
Qaidam
Chaqiabeishan	CQBSYT3-01-B1	granite		245	4	zircon	U–Pb LA-ICPMS	Ding et al., 2021, 10.1002/gj.4338
	B1	pegmatite	Li-Be-Nb-Ta-Cs	240.6	3	columbite	U–Pb LA-ICPMS	Pan et al., 2021, 10.3389/feart.2020.606951
	QR3	pegmatite	Li-Be-Nb-Ta-Cs	235.9	4.6	zircon	U–Pb LA-ICPMS	Wang et al., 10.16539/j.ddgzyckx.2019.02.016
	QR4	pegmatite	Li-Be-Nb-Ta-Cs	217	3.6	zircon	U–Pb LA-ICPMS	Wang et al., 10.16539/j.ddgzyckx.2019.02.016
	Qiemoge	pegmatite	Li-Be-Nb-Ta-Cs	229.5	2.6	zircon	U–Pb LA-ICPMS	Li et al., 2021, 10.16539/j.ddgzyckx.2021.03.009
W. Kunlun
	QT-BG-01	biotite granite	Li-Rb-Be-Nb-Ta	206.8	2.2	zircon	U–Pb LA-ICPMS	Yan et al., 2022, Economic Geology, v. 117, no. 1, pp. 213–236
	QT-TG-01	two-mica granite	Li-Rb-Be-Nb-Ta	205.9	3.4	zircon	U–Pb LA-ICPMS	Yan et al., 2022, Economic Geology, v. 117, no. 1, pp. 213–236
	QT-TG-01	granite	Li-Rb-Be-Nb-Ta	204.5	4.2	zircon	U–Pb LA-ICPMS	Yan et al., 2022, Economic Geology, v. 117, no. 1, pp. 213–236
	BLS-BG-01	biotite granite	Li-Rb-Be-Nb-Ta	210.8	3.4	zircon	U–Pb LA-ICPMS	Yan et al., 2022, Economic Geology, v. 117, no. 1, pp. 213–236
	BLS-BG-02	biotite granite	Li-Rb-Be-Nb-Ta	209.3	2.6	zircon	U–Pb LA-ICPMS	Yan et al., 2022, Economic Geology, v. 117, no. 1, pp. 213–236
	BLS-TG-01	two-mica granite	Li-Rb-Be-Nb-Ta	208.3	3	zircon	U–Pb LA-ICPMS	Yan et al., 2022, Economic Geology, v. 117, no. 1, pp. 213–236
	2018KL04-2	Monzogranite		198.9	2	zircon	U–Pb LA-ICPMS	Liu et al., 2020 Lihoshphere, 10.2113/2021/7282037
	DH03	granite		217.5	5.6	zircon	U–Pb SHRIMP	Zhang et al., INTERNATIONAL GEOLOGY REVIEW, 2018 https://doi.org/10.1080/00206814.2017.1419444
	14QW145-2	granite		211.5	4	zircon	U–Pb SIMS	This study
	14QW143	granite		210.5	6.6	zircon	U–Pb SIMS	This study
	14QW145-1	granite		208.7	1..9	zircon	U–Pb SIMS	This study
	BLS10	granite		208.6	3.6	zircon	U–Pb LA-ICPMS	This study
	XEBL-01	pegmatite	Li-Rb-Be-Nb-Ta	204.6	4.2	coltan	U–Pb LA-ICPMS	Yan et al., 2022, Economic Geology, v. 117, no. 1, pp. 213–236
	HSTS-01	pegmatite	Li-Rb-Be-Nb-Ta	205.7	5.4	coltan	U–Pb LA-ICPMS	Yan et al., 2022, Economic Geology, v. 117, no. 1, pp. 213–236
	MLC-01	pegmatite	Li-Rb-Be-Nb-Ta	206.4	4	coltan	U–Pb LA-ICPMS	Yan et al., 2022, Economic Geology, v. 117, no. 1, pp. 213–236
	XFL-01	pegmatite	Li-Rb-Be-Nb-Ta	208.4	3.4	coltan	U–Pb LA-ICPMS	Yan et al., 2022, Economic Geology, v. 117, no. 1, pp. 213–236
	BLS-01	pegmatite	Li-Rb-Be-Nb-Ta	207.4	1.2	monazite	U–Pb LA-ICPMS	Yan et al., 2022, Economic Geology, v. 117, no. 1, pp. 213–236
	HSTS-01	pegmatite	Li-Rb-Be-Nb-Ta	204.2	1.6	monazite	U–Pb LA-ICPMS	Yan et al., 2022, Economic Geology, v. 117, no. 1, pp. 213–236
	505	pegmatite	Li-Rb-Be-Nb-Ta	223	11	Cassiterite	U–Pb LA-ICPMS	Cao et al., 2020, 10.3389/feart.2020.591966
	2018KL02	pegmatite	Li-Rb-Be-Nb-Ta	196.1	2	zircon	U–Pb LA-ICPMS	Liu et al., 2020 Lihotshphere, 10.2113/2021/7282037
	2018KL09-1	pegmatite	Li-Rb-Be-Nb-Ta	195.2	3	zircon	U–Pb LA-ICPMS	Liu et al., 2020 Lihotshphere, 10.2113/2021/7282037
	DHLT-1	pegmatite	Li-Rb-Be-Nb-Ta	218	12	cassiterite	U–Pb LA-ICPMS	Yan et al., Ore Geology Reviews 100 (2018) 561–573
	DHLT-1	pegmatite	Li-Rb-Be-Nb-Ta	211.9	2.4	columbite-(Fe).	U–Pb LA-ICPMS	Yan et al., Ore Geology Reviews 100 (2018) 561–573
	BLS-B5	pegmatite	Li-Rb-Be-Nb-Ta	212.3	3.2	zircon	U–Pb LA-ICPMS	Wang et al., Lithos 360–361 (2020) 105449
	V-1	pegmatite	Li-Rb-Be-Nb-Ta	208.1	3	coltan	U–Pb LA-ICPMS	Wang et al., Lithos 360–361 (2020) 105449
	505	pegmatite	Li-Rb-Be-Nb-Ta	223	11	cassiterite	U–Pb LA-ICPMS	Li et al., 2019 Northwestern Geology
	KXW-1	pegmatite	Li-Rb-Be-Nb-Ta	209	4.4	zircon	U–Pb LA-ICPMS	Zhang et al., 2019 Northwestern Geology
	509	pegmatite	Li-Rb-Be-Nb-Ta	208.8	3.4	zircon	U–Pb LA-ICPMS	Tan et al., 2021, 10.16206/j.cnki.65-1136/tg.2021.02.003
	BLS41	pegmatite	Li-Rb-Be-Nb-Ta	209.8	0.84	zircon	U–Pb LA-ICPMS	This study
	BLS1746	pegmatite	Li-Rb-Be-Nb-Ta	208.2	3	zircon	U–Pb LA-ICPMS	This study
	BLS1724	pegmatite	Li-Rb-Be-Nb-Ta	208.5	2.4	zircon	U–Pb LA-ICPMS	This study
Songpan-Ganze
	LMH3	two-mica granite		219.2	2.3	zircon	U–Pb LA-ICPMS	Fei et al., Lithos 364–365 (2020) 105555
	LM107	muscovite albite granite		217	2.8	zircon	U–Pb LA-ICPMS	Fei et al., Lithos 364–365 (2020) 105555
	PD023-B2	granite		223	2	zircon	U–Pb LA-ICPMS	Hao et al., 2015, Mineral Deposits
Jiajika	JJK2017-1-1	granite		206	3.2	zircon	U–Pb SIMS	Li et al., 2020, Mineral Deposits
	JJK2017-8-1	granite		212.9	5.9	zircon	U–Pb SIMS	Li et al., 2020, Mineral Deposits
Jiajika	JJKYG157-2	aplite		217	1.6	zircon	U–Pb LA-ICPMS	Dai et al., 2019 Journal of Earth Science
	PM103-44DN1	granite		213.8	2.2	zircon	U–Pb LA-ICPMS	Geng et al., 2020
Zhawulong	ZG-1	granite		211.6	5.2	zircon	U–Pb LA-ICPMS	Li et al., Minerals 2019, 9, 280; doi:10.3390/min9050280
Dangba	DB2	pegmatite	Li-Nb-Ta-Be-Sn	208.1	3.8	cassiterite	U–Pb LA-ICPMS	Fei et al., 2020 Acta Geologica Sinica
	DB1	pegmatite	Li-Nb-Ta-Be-Sn	199.3	3.2	cassiterite	U–Pb LA-ICPMS	Fei et al., 2020 Acta Geologica Sinica
Lijiagou	LPD4H2	pegmatite	Li-Cs-Ta	211.4	6.6	cassiterite	U–Pb LA-ICPMS	Xu et al., 2020 Geology and Exploration
	LPD4H2	pegmatite	Li-Cs-Ta	208.5	2.7	coltan	U–Pb LA-ICPMS	Fei et al., Lithos 364–365 (2020) 105555
	LPD2H2	pegmatite	Li-Cs-Ta	198	3.4	zircon	U–Pb LA-ICPMS	Fei et al., 2018 Acta Geologica Sinica
	LKH3	pegmatite	Li-Cs-Ta	202.8	4.9	zircon	U–Pb LA-ICPMS	Fei et al., Lithos 364–365 (2020) 105555
	LPD4H2	pegmatite	Li-Cs-Ta	200.1	4.6	zircon	U–Pb LA-ICPMS	Fei et al., Lithos 364–365 (2020) 105555
Jiajika	134-11	pegmatite	Li-Nb-Ta-Be-Sn	203.7	4.6	cassiterite	U–Pb LA-ICPMS	Zhou eta l., 2021, Rock and Mineral Analysis
	JJK2017-8-3	pegmatite	Li-Nb-Ta-Be-Sn	186.7	6	zircon	U–Pb SIMS	Li et al., 2020, Mineral Deposits
	X03	pegmatite	Li-Nb-Ta-Be-Sn	216	4	zircon	U–Pb LA-ICPMS	Hao et al., 2015, Mineral Deposits
	X03	pegmatite	Li-Nb-Ta-Be-Sn	214	4	Nb-Ta oxide	U–Pb LA-ICPMS	Hao et al., 2015, Mineral Deposits
	JJKYG162	pegmatite	Li-Nb-Ta-Be-Sn	210.9	4.6	cassiterite	U–Pb LA-ICPMS	Dai et al., 2018 Earth Science
	JKYG162.3	pegmatite	Li-Nb-Ta-Be-Sn	210.9	4.6	cassiterite	U–Pb LA-ICPMS	Dai et al., 2019 Journal of Earth Science
	JKYG75.21	pegmatite	Li-Nb-Ta-Be-Sn	198.4	4.4	cassiterite	U–Pb LA-ICPMS	Dai et al., 2019 Journal of Earth Science
Caolong	2KCL-1	pegmatite	Li-Be	204.01	0.6	monazite	U–Pb LA-ICPMS	Li et al., 2021,10.16539/j.ddgzyckx.2021.05.021
	2KCL-5	pegmatite	Li-Be	200.42	1.4	monazite	U–Pb LA-ICPMS	Li et al., 2021,10.16539/j.ddgzyckx.2021.05.021
Rongxuka	17090611	pegmatite	Li-Nb-Ta-Be-Sn	205.2	4.1	zircon	U–Pb LA-ICPMS	Geng et al., 2020
	Zct-1	pegmatite	Li-Nb-Ta-Be-Sn	204.5	1.8	columbite–tantalites	U–Pb LA-ICPMS	Li et al., Minerals 2019, 9, 280; doi:10.3390/min9050280
Xuebaoding	PKT-1	pegmatite	Sn–W–B	193.6	6	cassiterite	U–Pb LA-ICPMS	Zhang et al., Ore Geology Reviews 62 (2014) 315–32
Che, X.-D., F.-Y. Wu, R.-C. Wang, A. Gerdes, W.-Q. Ji, Z.-H. Zhao, J.-H. Yang, and Z.-Y. Zhu (2015), In situ U–Pb isotopic dating of columbite–tantalite by LA–ICP–MS, Ore Geology Reviews, 65, 979-989. doi: https://doi.org/10.1016/j.oregeorev.2014.07.008.
Chen, C., X. Lü, C. Wu, X. Jiang, and C. Mao (2018), Origin and Geodynamic Implications of Concealed Granite in Shadong Tungsten Deposit, Xinjiang, China: Zircon U-Pb Chronology, Geochemistry, and Sr-Nd-Hf Isotope Constraint, Journal of Earth Science, 29(1), 114-129. doi: 10.1007/s12583-017-0808-7.
Chen, J., H. Zhang, J. Zhang, and H. Ma (2018), Geochronology and Hf isotope of zircon for Koktokay No.3 granitic pegmatite in Xinjiang and its geological implications, The Chinese Journal of Nonferrous Metals, 28(9), 1832-1844.
Dai, H., D. Wang, L. Liu, Y. Yu, J. Dai, and X. Fu (2018), Geochronology,Geochemistry and Their Geological Significances of No.308 Pegmatite Vein in the Jiajika Deposit,Western Sichuan,China, Earth Science, 43(10), 3664-3681.
Dai, H. Z., D. H. Wang, L. J. Liu, Y. Yu, and J. J. Dai (2019), Geochronology and Geochemistry of Li(Be)-Bearing Granitic Pegmatites from the Jiajika Superlarge Li-Polymetallic Deposit in Western Sichuan, China, Journal of Earth Science, 30(4), 707-727. doi: 10.1007/s12583-019-1011-9.
Ding, Q.-F., T. Pan, X. Zhou, L. Cheng, S.-P. Li, J. Han, Y. Qian, Y. Gao, and M.-Y. Shang (2022), Geochronology, petrogenesis, and tectonic significance of the granites in the Chaqiabeishan area of the Quanji Massif, northwestern China, Geological Journal, 57(3), 1241-1261. doi: https://doi.org/10.1002/gj.4338.
Fei, G., Z. Yang, J. Yang, W. Luo, Y. Deng, Y. Lai, X. Tao, L. Zheng, W. Tang, and J. Li (2020a), New precise timing constraint for the Dangba granitic pegmatite type rare-metal deposit,Markam,Sichuan Province,evidence from cassiterite LA-MC-ICP-MS U-Pb dating, Acta Geologica Sinica, 94(3), 836-849.
Fei, G., et al. (2020b), Petrogenesis of the Lijiagou spodumene pegmatites in Songpan-Garze Fold Belt, West Sichuan, China: Evidence from geochemistry, zircon, cassiterite and coltan U-Pb geochronology and Hf isotopic compositions, Lithos, 364-365, 105555. doi: https://doi.org/10.1016/j.lithos.2020.105555.
Feng, Y., T. Liang, Z. Zhang, Y. Wang, Y. Zhou, X. Yang, J. Gao, H. Wang, and K. Ding (2019), Columbite U-Pb Geochronology of Kalu’an Lithium Pegmatites in Northern Xinjiang, China: Implications for Genesis and Emplacement History of Rare-Element Pegmatites, Minerals, 9(8), 456.
Gao, Y., L. Bagas, K. Li, M. Jin, Y. Liu, and J. Teng (2020), Newly Discovered Triassic Lithium Deposits in the Dahongliutan Area, NorthWest China: A Case Study for the Detection of Lithium-Bearing Pegmatite Deposits in Rugged Terrains Using Remote-Sensing Data and Images, Frontiers in Earth Science, 8. doi: 10.3389/feart.2020.591966.
Gusev, N. I. (2011), Chronology (SHRIMP II) of magmatism in the Kalguty rare-metal-tungsten-molybdenum ore-magmatic system, Gorny Altai, Russia, Geology of Ore Deposits, 53(3), 248-263.
Hao, X., X. Fu, B. Liang, L. Yuan, M. Pan, and Y. Tang (2015), Formation ages of granite and X03 pegmatite vein in Jiajika, western Sichuan, and their geological significance, Mineral Deposits, 34(6), 1199-1208.
Li, J., H. Zhang, and Z. Lu (2020), Genetic linkage between pegmatites and granites from Jingerquan,East Tianshan Mountains:Evidence from zircon U-Pb geochronological and Hf isotopic data, Geochimica, 49(4), 385-403.
Li, P., J. Li, I.-M. Chou, D. Wang, and X. Xiong (2019), Mineralization Epochs of Granitic Rare-Metal Pegmatite Deposits in the Songpan–Ganzê Orogenic Belt and Their Implications for Orogeny, Minerals, 9(5), 280.
Li, S., et al. (2021), Characteristics and Tectonic Significance of Beryl-bearing Pegmatites in Qiemoge Mountain,Northern Margin of Qaidam Basin, Geotectonica et Metallogenia, 45(3), 608-619.
Li, W. F., S. P. Li, B. Z. Wang, C. T. Wang, J. H. Liu, X. Y. Zhang, J. S. Cao, C. B. Xu, J. D. Liu, and T. T. Jing (2021), Discovery of the (Beryl-bearing) Spodumene Pegmatite in the Caolong Area in the Sanjiang Northern Section of the Qinghai: Implications for Li-Be Mineralization, Geotectonica et Metallogenia. doi: 10.16539/j.ddgzyckx.2021.05.021.
Li, X., et al. (2020), Genetic relationship between pegmatite and granite in Jiajika lithium deposit in western Sichuan:Evidence from zircon U-Pb dating,Hf-O isotope and geochemistry, Mineral Deposits, 39(2), 273-304.
Liu, F., Z. X. Zhang, Q. Li, C. Zhang, and C. Li (2014), New precise timing constraint for the Keketuohai No. 3 pegmatite in Xinjiang, China, and identification of its parental pluton, Ore Geology Reviews, 56, 209-219. doi: 10.1016/j.oregeorev.2013.08.020.
Liu, X.-Q., C.-L. Zhang, H. Zou, Q. Wang, X.-S. Hao, H.-X. Zhao, and X.-T. Ye (2020), Triassic-Jurassic Granitoids and Pegmatites from Western Kunlun-Pamir Syntax: Implications for the Paleo-Tethys Evolution at the Northern Margin of the Tibetan Plateau, Lithosphere, 2020(1). doi: 10.2113/2020/7282037.
Lv, Z.-H., H. Zhang, Y. Tang, and S.-J. Guan (2012), Petrogenesis and magmatic–hydrothermal evolution time limitation of Kelumute No. 112 pegmatite in Altay, Northwestern China: Evidence from zircon UPb and Hf isotopes, Lithos, 154, 374-391. doi: https://doi.org/10.1016/j.lithos.2012.08.005.
Ma, Z., H. Zhang, Y. Tang, Z. Lu, X. Zhang, and J. Zhao (2015), Zircon U-Pb geochronology and Hf isotopes of pegmatites from the Kaluan mining area in the Altay, Xinjiang and their genetic relationship with the Halong granite, Geochimica, 44(1), 9-26.
Pan, T., Q.-F. Ding, X. Zhou, S.-P. Li, J. Han, and L. Cheng (2021), Columbite-Tantalite Group Mineral U-Pb Geochronology of Chaqiabeishan Li-Rich Granitic Pegmatites in the Quanji Massif, NW China: Implications for the Genesis and Emplacement Ages of Pegmatites, Frontiers in Earth Science, 8. doi: 10.3389/feart.2020.606951.
Ren, B., H. Zhang, Y. Tang, and Z. Lv (2011), LA-ICPMS U-Pb Zircon Geochronology of the Altai Pegmatites and Its Geological Significance, Acta Mineralogica Sinica, 31(3), 587-596.
Vladimirov, A. G., S. A. Vystavnoi, A. V. Titov, S. Rudnev, V. B. Dergachev, I. Annikova, Y. V. Tikunov, and V. Yu (1998), Petrology of the Early Mesozoic rare-metal granites of the southern Gorny Altay, Russian Geology and Geophysics, 39, 909-925.
Wang, B., J. Han, X. Xie, J. Chen, T. Wang, W. Xue, Z. Bai, and S. Li (2020), Discovery of the Indosinian(Beryl-bearing)Spodumene Pegmatitic Dike Swarm in the Chakaibeishan Area in the Northeastern Margin of the Tibetan Plateau: Implications for Li-Be Mineralization, Geotectonica et Metallogenia, 44(1), 69-79.
Wang, C. L., K. Z. Qin, D. M. Tang, Q. F. Zhou, M. D. Shen, Z. L. Guo, and X. J. Guo (2015), Geochronology and Hf isotope of zircon for the Arskartor Be-Nb-Mo deposit in Altay and its geological implications, Acta Petrologica Sinica, 31(8), 2337-2352.
Wang, H., H. Gao, X.-Y. Zhang, Q.-H. Yan, Y. Xu, K. Zhou, R. Dong, and P. Li (2020), Geology and geochronology of the super-large Bailongshan Li–Rb–(Be) rare-metal pegmatite deposit, West Kunlun orogenic belt, NW China, Lithos, 360-361, 105449. doi: https://doi.org/10.1016/j.lithos.2020.105449.
Wang, Q., K. Hou, and T. Zou (2019), Isotopicdating method suitable for rare-metal deposits and its application, Acta Geologica Sinica, 93(6), 1523-1532.
Wang, T., Y. Tong, B.-m. Jahn, T.-r. Zou, Y.-b. Wang, D.-w. Hong, and B.-f. Han (2007), SHRIMP U–Pb Zircon geochronology of the Altai No. 3 Pegmatite, NW China, and its implications for the origin and tectonic setting of the pegmatite, Ore Geology Reviews, 32(1), 325-336. doi: https://doi.org/10.1016/j.oregeorev.2006.10.001.
Yan, J., F. Liu, Y. Shen, and Z. Zhang (2020), Constraints on Timing of Magmatic Activity and Formation of Pegmatite in the Koktokay Pegmatite Field, Xinjiang, Acta Geoscientia Sinica, 41(5), 663-674.
Yan, Q.-H., H. Wang, G. Chi, Q. Wang, H. Hu, K. Zhou, and X.-Y. Zhang (2022), Recognition of a 600-km-long Late Triassic rare-metal (Li–Rb–Be–Nb–Ta) pegmatite belt in the Western Kunlun orogenic belt, western China, Economic Geology, 117(1), 213-236. doi: 10.5382/econgeo.4858.
Yan, Q.-H., Z.-W. Qiu, H. Wang, M. Wang, X.-P. Wei, P. Li, R.-Q. Zhang, C.-Y. Li, and J.-p. Liu (2018), Age of the Dahongliutan rare metal pegmatite deposit, West Kunlun, Xinjiang (NW China): Constraints from LA–ICP–MS U–Pb dating of columbite-(Fe) and cassiterite, Ore Geology Reviews, 100, 561-573. doi: https://doi.org/10.1016/j.oregeorev.2016.11.010.
Yong, T., Z. Hui, and L. Zheng-Hang (2021), The Genesis of the Askartor Be-Mo Deposit in the North Xinjiang, Northwest China: Evidence From Geology, Geochemistry, U-Pb, and Re-Os Geochronology, Frontiers in Earth Science, 9. doi: 10.3389/feart.2021.646772.
Zhang, D., J. Peng, I. M. Coulson, L. Hou, and S. Li (2014), Cassiterite U–Pb and muscovite40Ar–39Ar age constraints on the timing of mineralization in the Xuebaoding Sn–W–Be deposit, western China, Ore Geology Reviews, 62, 315-322. doi: https://doi.org/10.1016/j.oregeorev.2014.04.011.
Zhang, H., Z. Lu, and Y. Tang (2019), Metallogeny and prospecting model as well as prospecting direction of pegmatite-type rare metal ore deposits in Altay orogenic belt,Xinjiang, Mineral Deposits, 38(4), 792-814.
Zhang, Q., Y. Liu, Z. Wu, H. Huang, K. Li, and Q. Zhou (2018), Late Triassic granites from the northwestern margin of the Tibetan Plateau, the Dahongliutan example: petrogenesis and tectonic implications for the evolution of the Kangxiwa Palaeo-Tethys, International Geology Review, 61(2), 175-194. doi: 10.1080/00206814.2017.1419444.
Zhang, X., H. Zhang, Z.-L. Ma, Y. Tang, Z.-H. Lv, J.-Y. Zhao, and Y.-L. Liu (2016), A new model for the granite–pegmatite genetic relationships in the Kaluan–Azubai–Qiongkuer pegmatite-related ore fields, the Chinese Altay, Journal of Asian Earth Sciences, 124, 139-155. doi: https://doi.org/10.1016/j.jseaes.2016.04.020.
Zhi, J., R. Lei, B. Chen, M. N. Muhtar, Z. Feng, K. Zhang, Y. Cai, and C. Wu (2021), Zircon Genesis and Geochronology for the Zhangbaoshan Super-Large Rubidium Deposit in the Eastern Tianshan, NW China: Implication to Magmatic-Hydrothermal Evolution and Mineralization Processes, Frontiers in Earth Science, 9. doi: 10.3389/feart.2021.682720.
Zhou, X., Y. Zhou, B. Sun, H. Tan, X. Yue, and Z. Zhu (2021), Cassiterite U-Pb Dating of No.134 Pegmatite Vein in the Jiajika Rare Metal Deposit,Western Sichuan and Its Geological Significances, Rock and Mineral Analysis, 40(1), 156-164.

## Sheet: Table-S8 zircon Hf summary
Table S8 Compilation of zircon Hf isotopes for the pegmatite and related granite from the East Asia rare-metal pegmatite deposits.
Sample	Location	rock type	Reference	age (Ma)	176Yb/177Hf	176Lu/177Hf	176Hf/177Hf	2SE	eHf(t)
Altai
KLA2017-19-3	Kaluan	granite	Liu et al., 2020 Acta Geologica Sinica
1				412.6	0.045976	0.001476	0.282564	2.4e-05	1.3
2				404.8	0.032715	0.000989	0.282628	1.7e-05	3.6
3				407.7	0.047146	0.001427	0.282669	2e-05	4.9
4				404.4	0.040484	0.001284	0.282629	2e-05	3.5
5				410.3	0.061605	0.001922	0.282741	2e-05	7.4
6				405.8	0.041934	0.001235	0.282609	2.2e-05	2.8
7				412.5	0.047671	0.001464	0.282623	1.8e-05	3.4
8				412.8	0.046086	0.001503	0.282637	2e-05	3.9
9				409.8	0.073818	0.002189	0.282732	2e-05	7
10				401	0.040004	0.001244	0.282675	2.2e-05	5.1
11				422.4	0.039056	0.001239	0.28266	2.2e-05	5
12				417.9	0.044854	0.001376	0.282712	2.9e-05	6.7
13				402.8	0.036809	0.001103	0.282621	2e-05	3.2
14				404.8	0.037758	0.001165	0.282653	2e-05	4.4
15				401.5	0.028069	0.000875	0.282662	2.3e-05	4.7
16				399.1	0.042681	0.00127	0.282693	2.2e-05	5.7
17				409.4	0.040063	0.001224	0.282692	2e-05	5.9
18				414	0.069222	0.002124	0.282718	2.1e-05	6.6
19				400.8	0.044179	0.001383	0.282581	2.4e-05	1.7
20				395	0.048773	0.0015	0.282699	1.8e-05	5.7
21				421	0.040624	0.001222	0.282661	1.9e-05	5
22				416.8	0.056238	0.001671	0.282591	2.1e-05	2.3
23				412.9	0.043957	0.001344	0.282724	2.5e-05	7
24				406.2	0.058577	0.001843	0.28267	1.9e-05	4.8
25				405.9	0.044469	0.001379	0.282635	2.1e-05	3.7
26				407.9	0.05106	0.001563	0.282672	2.1e-05	5
27				407.9	0.08038	0.002466	0.282702	2.2e-05	5.8
28				407.9	0.033618	0.001081	0.282637	2.2e-05	3.9
29				407.9	0.033774	0.001015	0.282683	1.8e-05	5.6
KLA2017-16-1	Kaluan	pegmatite	Liu et al., 2020 Acta Geologica Sinica
1				205	0.001456	3.8e-05	0.282672	1.1e-05	1
2				229.9	0.0014	3.3e-05	0.282676	1.2e-05	1.7
3				216.5	0.001057	2.7e-05	0.28267	1.1e-05	1.1
4				205	0.000758	2.1e-05	0.282674	7e-06	1
5				205	0.000389	9e-06	0.282675	1e-05	1.1
6				205	0.001206	2.6e-05	0.282666	1.4e-05	0.8
7				205	0.000763	2.1e-05	0.282674	9e-06	1
8				205	0.001688	4e-05	0.282671	1e-05	0.9
9				205	0.001611	4.2e-05	0.282674	1e-05	1
10				205	0.002436	5.3e-05	0.282657	8e-06	0.4
11				205	0.001043	2.7e-05	0.282672	7e-06	1
12				205	0.001311	3.3e-05	0.28266	8e-06	0.5
13				205	0.001496	3.6e-05	0.282639	9e-06	-0.2
14				200.3	0.000929	2.6e-05	0.282659	7e-06	0.4
15				205	0.00118	2.7e-05	0.282685	9e-06	1.4
16				205	0.002101	5.1e-05	0.282677	9e-06	1.1
17				221.6	0.000787	1.9e-05	0.282661	8e-06	0.9
18				205	0.001005	2.2e-05	0.282667	1.1e-05	0.8
19				193.5	0.001188	2.8e-05	0.282652	1.2e-05	0
19				205.2	0.001043	2.8e-05	0.282673	1e-05	1
KLA2017-19-1	Kaluan	pegmatite	Liu et al., 2020 Acta Geologica Sinica
1				256.5	0.001231	2.9e-05	0.282668	1.3e-05	2
2				181.9	0.000851	2.2e-05	0.282658	1.1e-05	0
3				205	0.005308	0.000115	0.282661	9e-06	0.6
4				205	0.001226	3.2e-05	0.282666	1.1e-05	0.7
5				205	0.001737	4e-05	0.282657	1e-05	0.4
6				205	0.000619	1.6e-05	0.282678	9e-06	1.2
7				205	0.001857	4.5e-05	0.282688	8e-06	1.5
8				205	0.001378	3.3e-05	0.282657	8e-06	0.4
9				205	0.105461	0.003225	0.282785	2.2e-05	4.5
10				205	0.069215	0.002059	0.282763	1.3e-05	3.9
11				205	0.292279	0.009319	0.282907	4.4e-05	8
12				205	0.101053	0.003117	0.282675	2e-05	0.6
13				205	0.0605	0.001681	0.28275	1.3e-05	3.5
14				205	0.048898	0.001552	0.282748	1.2e-05	3.4
15				205	0.157548	0.004997	0.282807	2e-05	5.1
16				205	0.168875	0.005247	0.282762	2e-05	3.4
17				205	0.042915	0.001289	0.282773	1.2e-05	4.4
18				205	0.078051	0.002545	0.282772	1.3e-05	4.2
19				205	0.216313	0.006519	0.282742	3.3e-05	2.6
20				205	0.022017	0.000713	0.282649	1.2e-05	0.1
21				205	0.029703	0.000951	0.282757	1.4e-05	3.8
22				205	0.049561	0.00145	0.282746	1.5e-05	3.4
23				205	0.200134	0.006168	0.282896	3.3e-05	8.1
24				205	0.061106	0.001778	0.282778	1.7e-05	4.5
25				205	0.181871	0.005805	0.282881	3.7e-05	7.6
26				205	0.089645	0.002893	0.282657	1.6e-05	0
27				205	0.105934	0.003719	0.282775	1.6e-05	4.1
28				205	0.034617	0.001024	0.282766	1.2e-05	4.2
29				205	0.246247	0.007178	0.282885	2.7e-05	7.5
30				205	0.201613	0.006075	0.282649	3.7e-05	-0.7
31				205	0.086822	0.002805	0.282782	1.6e-05	4.5
32				205	0.020849	0.000713	0.282761	1.4e-05	4
33				205	0.141125	0.004301	0.282813	2.6e-05	5.4
34				205	0.281672	0.008654	0.282842	2.7e-05	5.8
35				205	0.090491	0.002649	0.282798	1.3e-05	5.1
36				205	0.032642	0.001008	0.282732	1.2e-05	3
37				205	0.037812	0.001204	0.282741	1.4e-05	3.2
38				205	0.066218	0.002041	0.28269	1.4e-05	1.3
KLP805	Kaluan	pegmatite	Ma et al., 2015 Geochemica
1				216	0.000619	2.5e-05	0.282678	6e-06	1.42
2				216	0.000548	2e-05	0.282699	5e-06	2.15
3				216	0.001446	5.1e-05	0.282673	5e-06	1.25
4				216	0.000639	1.9e-05	0.282693	4e-06	1.93
5				216	0.000235	8e-06	0.282708	5e-06	2.5
6				216	0.000407	1.4e-05	0.282669	7e-06	1.09
7				216	0.002839	0.000103	0.282707	6e-06	2.45
8				216	0.000297	1e-05	0.282688	4e-06	1.78
9				216	0.000374	1.2e-05	0.282674	5e-06	1.26
10				216	0.000509	2e-05	0.282638	6e-06	0
KLP806	Kaluan	pegmatite	Ma et al., 2015 Geochemica
1				224	0.000293	1.1e-05	0.282683	5e-06	1.77
2				224	0.000687	2.4e-05	0.28269	5e-06	2.02
3				224	0.000683	2.5e-05	0.28268	5e-06	1.67
4				224	0.000398	1.3e-05	0.282671	5e-06	1.34
5				224	0.000962	3.7e-05	0.28269	5e-06	2.01
6				224	0.000242	9e-06	0.282669	5e-06	1.29
7				224	0.000145	6e-06	0.282686	5e-06	1.89
8				224	0.000593	2.3e-05	0.28266	5e-06	0.95
9				224	0.000343	1.2e-05	0.282684	5e-06	1.8
10				224	0.000541	2.2e-05	0.282651	5e-06	0.65
KLP650-1	Kukalagai	pegmatite	Ma et al., 2015 Geochemica
1.1				228	0.000942	4.2e-05	0.28267	4e-06	1.41
1.2				228	0.000551	2.6e-05	0.282651	6e-06	0.71
1.3				228	0.000927	4.1e-05	0.282663	5e-06	1.15
1.4				228	0.000742	3.4e-05	0.282662	6e-06	1.13
1.5				228	0.000914	3.1e-05	0.282671	5e-06	1.44
1.6				228	0.000628	2.6e-05	0.282664	5e-06	1.18
1.7				228	0.001133	5.2e-05	0.282684	5e-06	1.89
1.8				228	0.001204	5.8e-05	0.282681	6e-06	1.79
1.9				228	0.000696	3e-05	0.282673	4e-06	1.51
1.1				228	0.003273	0.000139	0.282687	4e-06	1.99
KLP650-2	Kukalagai	pegmatite	Ma et al., 2015 Geochemica
2.1				211	8.6e-05	4e-06	0.282673	6e-06	1.15
2.2				211	0.001481	4.5e-05	0.282627	6e-06	-0.51
2.3				211	0.001003	3.2e-05	0.282676	5e-06	1.23
2.4				211	0.000103	4e-06	0.282683	5e-06	1.47
2.5				211	0.001324	3.8e-05	0.282692	5e-06	1.79
2.6				211	0.00089	2.8e-05	0.282667	5e-06	0.9
2.7				211	0.000122	4e-06	0.282662	5e-06	0.73
2.8				21	0.000933	2.9e-05	0.282679	5e-06	1.34
2.9				211	0.001012	3.1e-05	0.282674	5e-06	1.17
2.1				211	0.000598	1.8e-05	0.282678	5e-06	1.32
KLA803	Kaluan	pegmatite	X. Zhang et al. / Journal of Asian Earth Sciences 124 (2016) 139–155
KLA803-01				224.6	0.00026	1e-05	0.28268	6e-06	1.1
KLA803-02				224.6	0.00028	1e-05	0.28265	9e-06	0.1
KLA803-03				224.6	0.00065	2e-05	0.28271	7e-06	2.2
KLA803-04				224.6	0.00115	4e-05	0.28268	7e-06	1.1
KLA803-05				224.6	0.00095	3e-05	0.2827	7e-06	1.8
KLA803-06				224.6	0.00066	2e-05	0.28263	7e-06	-0.6
KLA803-07				224.6	0.00125	4e-05	0.28267	7e-06	0.8
KLA803-08				224.6	0.00136	4e-05	0.28269	7e-06	1.5
KLA803-09				224.6	0.00197	6e-05	0.28266	9e-06	0.4
KLA803-10				224.6	0.00051	1e-05	0.28266	7e-06	0.4
KLA803-11				224.6	0.00131	2e-05	0.28269	8e-06	1.5
KLA803-12				224.6	0.00123	3e-05	0.28265	8e-06	0.1
KLA803-13				224.6	0.00111	4e-05	0.28266	9e-06	0.4
KLA803-14				224.6	0.0087	3e-05	0.28264	7e-06	-0.3
KLA803-15				224.6	0.00253	2e-05	0.28267	8e-06	0.8
								0
AZB-01	Azubai	pegmatite	X. Zhang et al. / Journal of Asian Earth Sciences 124 (2016) 139–155					0
AZB-01-01				191.6	0.00037	1e-05	0.28267	5e-06	0.8
AZB-01-02				191.6	0.00309	9e-05	0.28263	1e-05	-0.6
AZB-01-03				191.6	0.01244	0.0005	0.2828	8e-06	5.3
AZB-01-04				191.6	0.00255	0.0001	0.28262	1.1e-05	-1
AZB-01-05				191.6	0.00361	0.00011	0.28272	7e-06	2.5
AZB-01--06				191.6	0.00052	1e-05	0.28264	7e-06	-0.3
AZB-01-07				191.6	0.00602	0.00018	0.28276	6e-06	3.9
AZB-01-08				191.6	0.01332	0.00056	0.28278	9e-06	4.6
AZB-01-09				191.6	0.008	0.00028	0.28272	6e-06	2.5
AZB-01-10				191.6	0.02116	0.00095	0.28283	7e-06	6.3
AZB-01-11				191.6	0.00522	0.00014	0.28271	6e-06	2.2
AZB-01-12				191.6	0.00409	0.00015	0.28275	6e-06	3.6
AZB-01-13				191.6	0.00979	0.00042	0.28274	8e-06	3.2
AZB-01-14				191.6	0.02213	0.00081	0.28271	7e-06	2.1
AZB-01-15				191.6	0.02321	0.00103	0.28277	7e-06	4.2
								0
JMK-09	Qiongkuer	pegmatite	X. Zhang et al. / Journal of Asian Earth Sciences 124 (2016) 139–155					0
JMK-09-01				192	0.00096	2e-05	0.28272	9e-06	2.6
JMK-09-02				192	0.00047	1e-05	0.28268	6e-06	1.1
JMK-09-03				192	0.00348	7e-05	0.28272	1e-05	2.5
JMK-09-04				192	0.00028	0	0.2827	7e-06	1.8
JMK-09-05				192	0.00017	0	0.28271	7e-06	2.2
JMK-09-06				192	0.00163	3e-05	0.28269	8e-06	1.5
JMK-09-07				192	0.00126	2e-05	0.28267	9e-06	0.8
JMK-09-08				192	0.00298	6e-05	0.28274	8e-06	3.3
JMK-09-09				192	0.00226	4e-05	0.28269	8e-06	1.5
JMK-09--10				192	0.00078	2e-05	0.28266	7e-06	0.4
JMK-09-11				192	0.00099	2e-05	0.28271	7e-06	2.2
JMK-09-12				192	0.00064	1e-05	0.28268	9e-06	1.1
JMK-09-13				192	0.00197	4e-05	0.2827	8e-06	1.8
JMK-09-14				192	0.00139	3e-05	0.28269	9e-06	1.5
JMK-09-15				192	0.00222	4e-05	0.28271	8e-06	2.2
								0
HLG-01	Halong	granite	X. Zhang et al. / Journal of Asian Earth Sciences 124 (2016) 139–155					0
HLG-01-01				399.7	0.03048	0.00113	0.28295	1e-05	14.8
HLG-01-02				399.7	0.03763	0.00138	0.28288	1e-05	12.3
HLG-01-03				399.7	0.02649	0.00103	0.28295	1.2e-05	14.8
HLG-01-04				399.7	0.02621	0.00104	0.28296	7e-06	15.2
HLG-01-05				399.7	0.01228	0.00042	0.28292	9e-06	13.9
HLG-01-06				399.7	0.03423	0.00182	0.2829	9e-06	12.9
HLG-01-07				399.7	0.03246	0.00172	0.28283	9e-06	10.4
HLG-01-08				399.7	0.02579	0.00128	0.28293	8e-06	14.1
HLG-01-09				399.7	0.02536	0.00147	0.28289	1e-05	12.6
HLG-01-10				399.7	0.01321	0.00142	0.28293	8e-06	14
HLG-01-11				399.7	0.03222	0.00171	0.28288	1e-05	12.2
								0
HLG-02	Halong	granite	X. Zhang et al. / Journal of Asian Earth Sciences 124 (2016) 139–155					0
HLG-02-01				397.3	0.03487	0.00132	0.28294	1e-05	14.4
HLG-02-02				397.3	0.0339	0.00131	0.28291	9e-06	13.3
HLG-02-03				397.3	0.02626	0.00099	0.28281	1e-05	9.9
HLG-02-04				397.3	0.04191	0.00151	0.28296	1.1e-05	15.1
HLG-02-05				397.3	0.04214	0.00155	0.28293	1.2e-05	14
HLG-02-06				397.3	0.03033	0.00118	0.28288	9e-06	12.3
HLG-02-07				397.3	0.02834	0.00109	0.28286	9e-06	11.6
HLG-02-08				397.3	0.02632	0.00107	0.28289	1e-05	12.7
HLG-02-09				397.3	0.04007	0.00167	0.28292	1.1e-05	13.6
HLG-02-10				397.3	0.04001	0.00166	0.28294	1.1e-05	14.3
HLG-02-11				397.3	0.03123	0.00126	0.2829	1.1e-05	13
HLG-02-12				397.3	0.02657	0.00118	0.28284	1e-05	10.9
KLP-1	Kelumute	pegmatite	Z.-H. Lv et al. / Lithos 154 (2012) 374–391
1				238	0.001314	1.7e-05	0.282682	8e-06	2.06
2				238	0.00143	2.1e-05	0.282681	9e-06	2.02
3				238	0.003419	4.8e-05	0.282681	7e-06	2.01
4				238	0.001306	1.8e-05	0.282682	7e-06	2.06
5				238	0.006356	8.7e-05	0.282682	1e-05	2.04
6				238	0.011519	0.000168	0.282682	1.1e-05	2.03
7				238	0.001731	2.5e-05	0.282672	6e-06	1.7
8				238	0.007525	9.8e-05	0.282684	6e-06	2.11
9				238	0.003863	5.1e-05	0.282688	1.1e-05	2.26
10				238	0.00324	6.8e-05	0.282681	8e-06	2.01
11				238	0.007584	0.000111	0.282675	1e-05	1.79
12				238	0.002664	3.8e-05	0.28268	9e-06	1.98
13				238	0.00215	3.3e-05	0.282683	8e-06	2.09
14				238	0.003128	4.5e-05	0.28268	9e-06	1.98
15				238	0.002455	3.9e-05	0.282673	9e-06	1.73
KLP-2	Kelumute	pegmatite	Z.-H. Lv et al. / Lithos 154 (2012) 374–391
1				233	0.000101	1.1e-06	0.282673	8e-06	1.62
2				233	0.000394	5.9e-06	0.282663	9e-06	1.26
3				233	0.004431	5.22e-05	0.282674	1.6e-05	1.65
4				233	0.003265	4.22e-05	0.282674	1.4e-05	1.65
5				233	0.000529	7.4e-06	0.282675	6e-06	1.69
6				233	0.00339	4.33e-05	0.282694	1.1e-05	2.35
7				233	0.000691	1.05e-05	0.282675	9e-06	1.69
8				233	0.000736	8.2e-06	0.282672	7e-06	1.58
9				233	0.000129	1.6e-06	0.282674	5e-06	1.65
10				233	0.000263	3.3e-06	0.282675	6e-06	1.69
11				233	9.8e-05	1e-06	0.282665	7e-06	1.34
12				233	0.000285	4e-06	0.282672	6e-06	1.58
13				233	0.001924	2.23e-05	0.282673	1.1e-05	1.61
14				233	0.000488	7.1e-06	0.28266	9e-06	1.16
15				233	0.004001	4.72e-05	0.28267	1.1e-05	1.5
KLP-3	Kelumute	pegmatite	Z.-H. Lv et al. / Lithos 154 (2012) 374–391
1				188	0.000132	2.03e-06	0.28267	5e-06	0.53
2				188	0.000798	1.382e-05	0.282672	8e-06	0.6
3				188	0.000339	4.65e-06	0.282673	9e-06	0.64
4				188	8.6e-05	1.53e-06	0.28267	9e-06	0.53
5				188	0.000161	2.44e-06	0.282671	9e-06	0.57
6				188	0.000138	2.1e-06	0.282676	9e-06	0.74
7				188	0.000235	3.48e-06	0.28267	1.5e-05	0.53
8				188	5.4e-05	8.9e-07	0.282656	1.2e-05	0.03
9				188	0.000116	2.22e-06	0.282666	1.6e-05	0.39
10				188	0.000177	2.59e-06	0.282673	1.7e-05	0.64
11				188	0.000127	1.9e-06	0.28268	1.4e-05	0.88
12				188	0.000161	2.97e-06	0.282676	1.4e-05	0.74
13				188	8.7e-05	1.63e-06	0.282672	1.3e-05	0.6
14				188	0.000372	5.04e-06	0.282667	1.4e-05	0.42
15				188	0.000684	1.338e-05	0.282672	1.4e-05	0.6
KLP-5	Kelumute	pegmatite	Z.-H. Lv et al. / Lithos 154 (2012) 374–391
1				219	3e-05	4.3e-07	0.282673	6e-06	1.31
2				219	2e-05	4.1e-07	0.282672	9e-06	1.27
3				219	0.000115	1.73e-06	0.282675	1e-05	1.38
4				219	3.1e-05	2.6e-07	0.282669	7e-06	1.17
5				219	4.9e-05	5.3e-07	0.282679	5e-06	1.52
6				219	0.000125	1.66e-06	0.282676	6e-06	1.42
7				219	2.4e-05	2e-07	0.282674	7e-06	1.35
8				219	0.000203	2.65e-06	0.282683	1e-05	1.66
9				219	5.9e-05	8.7e-07	0.282673	6e-06	1.31
10				219	2.7e-05	3.6e-07	0.282683	8e-06	1.66
11				219	2.5e-05	2.4e-07	0.282673	1e-05	1.31
12				219	1.7e-05	3.5e-07	0.282672	1.2e-05	1.27
13				219	3.1e-05	6.2e-07	0.282673	1.3e-05	1.31
14				219	2.6e-05	3.5e-07	0.282693	8e-06	2.02
15				219	1.6e-05	2.7e-07	0.282676	7e-06	1.42
KLP-6	Kelumute	pegmatite	Z.-H. Lv et al. / Lithos 154 (2012) 374–391
1				211	0.006083	5.4e-05	0.282682	8e-06	1.56
2				211	0.007548	8.5e-05	0.28268	8e-06	1.49
3				211	0.002732	3.9e-05	0.282681	7e-06	1.53
4				211	0.009267	0.000103	0.282676	8e-06	1.34
5				211	0.010765	0.000102	0.282664	8e-06	0.92
6				211	0.023134	0.000242	0.28269	9e-06	1.82
7				211	0.008029	7.6e-05	0.282664	8e-06	0.92
8				211	0.028482	0.000295	0.282673	1.4e-05	1.21
9				211	0.008407	9.1e-05	0.282681	7e-06	1.52
10				211	0.006004	6.1e-05	0.282682	8e-06	1.56
11				211	0.013231	0.000159	0.282682	9e-06	1.55
12				211	0.002107	2.7e-05	0.28268	7e-06	1.5
13				211	0.00649	6.7e-05	0.282669	8e-06	1.1
14				211	0.005728	5.4e-05	0.282671	8e-06	1.17
15				211	0.00462	4.1e-05	0.282681	8e-06	1.53
KLW-1	Kelumute	two-mica gneissic granite	Z.-H. Lv et al. / Lithos 154 (2012) 374–391
1				446	0.121343	0.002223	0.282617	1.4e-05	3.67
2				446	0.110542	0.001995	0.282578	1e-05	2.36
3				446	0.210584	0.003715	0.282539	1.4e-05	0.47
4				446	0.112996	0.002081	0.282567	1.2e-05	1.95
5				446	0.06525	0.001146	0.282475	1.8e-05	-1.03
6				446	0.143598	0.002577	0.282561	1.2e-05	1.59
7				446	0.069241	0.001298	0.28252	2.8e-05	0.51
8				446	0.102345	0.002088	0.282563	1.5e-05	1.8
9				446	0.140871	0.002674	0.282511	1.8e-05	-0.21
10				446	0.130696	0.002416	0.282475	1.7e-05	-1.41
11				446	0.106135	0.001964	0.28253	1.5e-05	0.67
12				446	0.124286	0.002265	0.282511	1.3e-05	-0.09
13				446	0.113059	0.0022	0.282557	1.3e-05	1.56
14				446	0.145408	0.002653	0.282542	1.8e-05	0.89
15				446	0.104613	0.002111	0.282596	2e-05	2.96
16				446	0.09297	0.001893	0.282565	1.1e-05	1.93
17				509	0.06285	0.001191	0.282301	1.6e-05	-5.85
18				446	0.135561	0.0026	0.28253	1.6e-05	0.48
KLW-2	Kelumute	biotite granite	Z.-H. Lv et al. / Lithos 154 (2012) 374–391
1				456	0.13309	0.002444	0.28261	1.3e-05	3.57
2				456	0.138873	0.002459	0.282626	1.3e-05	4.13
3				456	0.115941	0.002122	0.282597	1.5e-05	3.2
4				456	0.181008	0.003471	0.282601	1.1e-05	2.94
5				456	0.084749	0.001479	0.282561	1.1e-05	2.12
6				456	0.127727	0.002425	0.282623	1.3e-05	4.03
7				456	0.100641	0.001902	0.282588	1.7e-05	2.95
8				456	0.104114	0.00199	0.282588	1.9e-05	2.92
9				456	0.139326	0.002655	0.282596	1.3e-05	3.01
10				514	0.084562	0.001628	0.28219	3.5e-05	-9.83
11				498	0.084564	0.001628	0.28221	3.6e-05	-9.46
12				456	0.115963	0.002262	0.282591	1.8e-05	2.95
13				456	0.0414	0.000724	0.282528	1.5e-05	1.18
14				456	0.039771	0.000805	0.282599	1.5e-05	3.67
15				456	0.141192	0.002822	0.282591	1.3e-05	2.78
16				456	0.103955	0.002003	0.282598	1e-05	3.27
17				456	0.099427	0.001942	0.28261	1.3e-05	3.72
	Arskartor	pegmatite	Wang et al., 2015 Acta Petrologica Sinica
ASK-6-02				219.2	0.056203	0.002045	0.282643	1.1e-05	-0.05
ASK-6-04				219.2	0.22647	0.00714	0.282659	1.5e-05	-0.21
ASK-6-06				219.2	0.207875	0.006662	0.282643	1.7e-05	-0.72
ASK-6-08				219.2	0.4715	0.001516	0.282669	1.2e-05	0.94
ASK-6-12				219.2	0.11477	0.003838	0.282666	1.1e-05	0.5
ASK-6-14				219.2	0.163453	0.004751	0.282693	8e-06	1.33
ASK-6-15				219.2	0.087615	0.002779	0.282651	9e-06	0.14
ASK-6-19				219.2	0.035026	0.001216	0.282647	1e-05	0.22
ASK-1-02				222.6	0.030514	0.001048	0.282644	2.1e-05	0.19
ASK-1-09				222.6	0.038473	0.001371	0.282667	2.2e-05	0.96
ASK-1-11				222.6	0.051381	0.001507	0.282696	2e-05	1.99
ASK-1-12				222.6	0.030296	0.001146	0.282628	2.2e-05	-0.36
ASK-1-14				222.6	0.039417	0.001129	0.282655	1.8e-05	0.57
ASK-1-15				222.6	0.025494	0.000921	0.282651	1.6e-05	0.46
ASK-1-16				222.6	0.027867	0.00079	0.282649	2e-05	0.42
ASK-1-17				222.6	0.048515	0.001625	0.282661	1.8e-05	0.71
ASK-1-18				222.6	0.030792	0.001029	0.282656	1.9e-05	0.64
ASK-8-01				218.2	0.004532	0.000135	0.282638	2e-05	0.05
ASK-8-02				218.2	0.003965	0.000131	0.282648	1.7e-05	0.38
ASK-8-04				218.2	0.002189	6.1e-05	0.282632	1.8e-05	-0.18
ASK-8-06				218.2	0.002221	6.4e-05	0.282624	1.7e-05	-0.45
ASK-8-07				218.2	0.003973	0.000117	0.282633	1.7e-05	-0.14
ASK-8-09				218.2	0.01753	4.8e-05	0.282625	1.7e-05	-0.41
ASK-8-11				218.2	0.004088	0.000128	0.282634	2.2e-05	-0.11
ASK-8-13				218.2	0.003253	8.9e-05	0.282637	1.7e-05	0.01
ASK-8-15				218.2	0.005127	0.000164	0.28264	1.8e-05	0.1
ASK-8-18				218.2	0.003485	0.000106	0.282639	1.8e-05	0.08
ASK-8-19				218.2	0.000974	2.4e-05	0.282637	2.3e-05	0.03
ASK-8-20				218.2	0.003798	0.000124	0.282647	2.2e-05	0.34
Tianshan
J4	Jingerquan	granite	Li et al., 2020 Geochimica
1				220.2	0.017432	0.000362	0.28297	1e-05	11.8
2				220.2	0.008099	0.000171	0.282938	1e-05	10.7
3				220.2	0.005687	0.000124	0.282952	9e-06	11.2
4				220.2	0.014627	0.000304	0.282939	1e-05	10.7
5				220.2	0.010641	0.000235	0.282948	9e-06	11
6				220.2	0.005346	0.00011	0.282955	8e-06	11.3
7				220.2	0.009126	0.000192	0.282952	9e-06	11.2
8				220.2	0.008536	0.00019	0.282961	9e-06	11.5
J7	Jingerquan	granite	Li et al., 2020 Geochimica
1				223.2	0.014283	0.000502	0.28296	1.2e-05	11.5
2				223.2	0.060922	0.001822	0.282898	1.3e-05	9.1
3				223.2	0.053694	0.00164	0.282815	1.3e-05	6.2
4				223.2	0.07257	0.002182	0.28286	1.3e-05	7.7
5				223.2	0.044392	0.0014	0.282995	1.3e-05	12.6
6				223.2	0.035782	0.001162	0.282899	1.3e-05	9.2
7				223.2	0.071625	0.002246	0.282901	1.5e-05	9.1
8				223.2	0.100198	0.003135	0.2829	1.2e-05	9
J12	Jingerquan	granite	Li et al., 2020 Geochimica
1				223.6	0.136892	0.003641	0.282891	1.3e-05	8.6
2				223.6	0.043471	0.001341	0.282941	1.4e-05	10.7
3				223.6	0.050571	0.001621	0.282915	1.4e-05	9.7
4				223.6	0.084358	0.00263	0.28288	1.4e-05	8.3
5				223.6	0.1498	0.003815	0.282824	1e-05	6.2
6				223.6	0.074328	0.002119	0.282862	1e-05	7.8
7				223.6	0.072161	0.002286	0.282942	1.3e-05	10.6
8				223.6	0.050712	0.001601	0.282916	1.4e-05	9.8
J17	Jingerquan	pegmatite	Li et al., 2020 Geochimica
1				218	0.000197	4e-06	0.282967	8e-06	11.7
2				218	8.3e-05	2e-06	0.282938	9e-06	10.7
3				218	0.000897	2e-05	0.282984	9e-06	12.3
4				218	0.001278	3.1e-05	0.282935	8e-06	10.6
5				218	0.001142	2.8e-05	0.282974	9e-06	11.9
6				218	0.000225	5e-06	0.28294	8e-06	10.7
7				218	0.000285	6e-06	0.282952	8e-06	11.1
8				218	0.000232	5e-06	0.282985	9e-06	12.3
	Jing'erquanbei	granite	Muhtar et al., Geological Journal. 2020;55:117–132.
XJ613–1				250	0.071724	0.002673	0.283015	1.8e-05	13.6
XJ613–2				250	0.08954	0.003486	0.283002	1.6e-05	13
XJ613–4				250	0.062322	0.002444	0.282994	1.6e-05	13
XJ613–5				250	0.067657	0.002687	0.283031	1.8e-05	14.2
XJ613–6				250	0.039484	0.00157	0.28298	1.4e-05	12.6
XJ613–7				250	0.062963	0.002485	0.282994	2.1e-05	12.9
XJ613–12				250	0.066089	0.002706	0.283036	1.8e-05	14.4
XJ613–13				250	0.034175	0.001446	0.283003	1.8e-05	13.4
XJ613–18				250	0.066982	0.002517	0.283042	1.9e-05	14.6
XJ613–19				250	0.064555	0.002659	0.283026	1.9e-05	14
W Kunlun
145QW145 01		S-type granite		211.5	0.010205	0.000344	0.282438	1.2e-05	-7.25537
145QW145 02		S-type granite			0.00483643	0.000167221	0.282446	8.78311e-06	-6.9333
145QW145 03		S-type granite			0.0269901	0.00114325	0.282744	1.41318e-05
145QW145 04		S-type granite			0.011967	0.000433	0.282406	1.1e-05	-8.39991
145QW145 05		S-type granite			0.0046426	0.000159385	0.282499	1.16768e-05	-5.08175
145QW145 07		S-type granite			0.004002	0.000132	0.282424	1.3e-05	-7.72127
145QW145 08		S-type granite			0.010011	0.000355	0.282455	1.2e-05	-6.65543
145QW145 09		S-type granite			0.013656	0.00045	0.282413	1.2e-05	-8.1546
145QW145 10		S-type granite			0.028323	0.00104	0.282681	1.2e-05
145QW145 11		S-type granite			0.011842	0.000378	0.28244	1.1e-05	-7.18933
145QW145 12		S-type granite			0.010541	0.000363	0.28238	1.4e-05	-9.31008
145QW145 13		S-type granite			0.02307	0.000976	0.282478	1.3e-05	-5.9279
BLS-10-H1		S-type granite		208.6	0.0107164	0.000393486	0.282275	1.78284e-05	-13.012
BLS-10-H3		S-type granite			0.0375886	0.00136794	0.282406	1.82094e-05	-8.53098
BLS-10-H4		S-type granite			0.0406485	0.00157775	0.282503	1.70536e-05	-5.11686
BLS-10-H5		S-type granite			0.0269964	0.00101658	0.282508	1.68962e-05	-4.88024
BLS-10-H6		S-type granite			0.0251264	0.000961817	0.282444	1.89972e-05	-7.11298
BLS-10-H7		S-type granite			0.0180998	0.0006406	0.282392	2.07002e-05	-8.92906
BLS-10-H8		S-type granite			0.0359178	0.00130025	0.282416	2.71574e-05	-8.17448
BLS-10-H9		S-type granite			0.064342	0.00232248	0.282337	3.46416e-05	-11.1112
BLS-46-H1		barren pegmatite		208.2	0.00120379	4.58124e-05	0.282447	8.01026e-06	-6.88154
BLS-46-H2		barren pegmatite			0.0260256	0.000904919	0.282451	1.06766e-05	-6.8702
BLS-46-H3		barren pegmatite			0.00111598	3.78542e-05	0.282421	8.63383e-06	-7.82897
BLS-46-H4		barren pegmatite			0.00510513	0.000171701	0.282427	1.25713e-05	-7.61029
BLS-46-H5		barren pegmatite			0.000914117	2.91064e-05	0.282431	1.07377e-05	-7.47175
BLS-46-H6		barren pegmatite			0.00422508	0.000179178	0.282424	9.93284e-06	-7.74365
BLS17-41-H1		barren pegmatite			0.0123163	0.000371034	0.282499	1.34964e-05	-5.09083
BLS17-41-H2		barren pegmatite			0.0183052	0.000514779	0.282493	1.79894e-05	-5.33602
BLS17-41-H3		barren pegmatite			0.031184	0.00102993	0.282455	1.54414e-05	-6.7518
BLS17-41-H4		barren pegmatite			0.0169369	0.000549866	0.282466	1.85638e-05	-6.27685
BLS17-41-H5		barren pegmatite			0.0369901	0.00119807	0.282403	1.25195e-05	-8.59919
BLS17-41-H6		barren pegmatite			0.0126319	0.000388393	0.282469	1.37121e-05	-6.15678
BLS17-24-H1		rare-metal pegmatite		208.5	0.0114248	0.000305449	0.282473	9.64709e-06	-6.01331
BLS17-24-H2		rare-metal pegmatite			0.00329045	9.78062e-05	0.28247	9.2702e-06	-6.07633
BLS17-24-H3		rare-metal pegmatite			0.00352608	9.38197e-05	0.282442	1.17904e-05	-7.07817
BLS17-24-H4		rare-metal pegmatite			0.00432306	0.000125832	0.282465	1.60209e-05	-6.27962
BLS17-24-H5		rare-metal pegmatite			0.0050022	0.000147585	0.282477	1.34528e-05	-5.8588
BLS17-24-H6		rare-metal pegmatite			0.00276225	7.47395e-05	0.282487	8.82026e-06	-5.4692
BLS17-24-H7		rare-metal pegmatite			0.00234529	6.84336e-05	0.282471	1.52089e-05	-6.04359
BLS17-24-H8		rare-metal pegmatite			0.00382141	0.000102573	0.282469	1.65371e-05	-6.12476
BLS17-24-H9		rare-metal pegmatite			0.00461552	0.000115584	0.282489	9.34239e-06	-5.41623
DH03@5	Dahogliutan	granite	Zhang et al., INTERNATIONAL GEOLOGY REVIEW, 2018 https://doi.org/10.1080/00206814.2017.1419444	217.3	0.0459	0.0017	0.282578		-2.3
DH03@6				218	0.0211	0.0007	0.282587		-1.9
DH03@10				218.8	0.0488	0.0016	0.282253		-13.8
DH03@13				219.3	0.0361	0.0011	0.282594		-1.6
DH03@16				214.5	0.02	0.0006	0.282299		-12.1
DH03@19				217.6	0.0226	0.0007	0.282273		-13
DH03@1				208.8	0.0102	0.0003	0.281153		-52.7
DH03@2				1723.4	0.0024	0.0001	0.281589		-3.5
DH03@3				205.8	0.0335	0.0011	0.282517		-4.6
DH03@4				226	0.0354	0.0012	0.282652		0.5
DH03@7				393.6	0.0237	0.0008	0.282381		-5.4
DH03@8				370	0.0273	0.0009	0.282393		-5.5
DH03@9				267.3	0.026	0.0009	0.282393		-7.7
DH03@11				223.6	0.022	0.0007	0.282385		-8.9
DH03@12				234.6	0.0294	0.001	0.282692		2.2
DH03@14				311	0.0323	0.0011	0.282376		-7.4
DH03@15				296.8	0.0323	0.0012	0.282316		-9.8
DH03@17				396.9	0.0241	0.0009	0.282529		-0.1
DH03@18				252.1	0.0563	0.002	0.282556		-2.4
DH03@21				499.7	0.0447	0.0015	0.282527		1.8
DH03@22				274	0.0174	0.0005	0.282412		-6.8
DH03@23				878.2	0.0333	0.0011	0.282185		-2
DH03@24				257.2	0.0438	0.0014	0.282581		-1.4
	Dahogliutan	granite	Wei et al., 2018
DHLT3-15				210	0.024648	0.000633	0.282376	8e-06	-9.49
DHLT3-20				206	0.041673	0.001194	0.282415	8e-06	-8.24
DHLT3-25				209	0.013544	0.000483	0.282457	8e-06	-6.63
DHLT3-31				211	0.015454	0.000492	0.282517	7e-06	-4.47
DHLT3-33				211	0.016068	0.000554	0.282449	1.1e-05	-6.87
DHLT3-39				210	0.015331	0.000535	0.282476	1.1e-05	-5.95
DHLT3-46				210	0.040326	0.001085	0.282489	7e-06	-5.56
DHLT3-54				209	0.018867	0.000579	0.282456	1e-05	-6.67
	Dahogliutan	granite	Wei et al., 2018
MJX-5-1				211	0.03929	0.00108	0.282503	7e-06	-5.03
MJX-5-8				213	0.018988	0.000565	0.282236	7e-06	-14.36
MJX-5-9				209	0.05689	0.001513	0.282515	6e-06	-4.71
MJX-5-10				206	0.021803	0.000592	0.282486	7e-06	-5.66
MJX-5-13				207	0.068618	0.00192	0.28257	7e-06	-2.86
MJX-5-17				209	0.050385	0.001454	0.282594	7e-06	-1.92
MJX-5-19				210	0.040198	0.001029	0.282487	6e-06	-5.6
MJX-5-23				207	0.058732	0.001742	0.282634	9e-06	-0.6
MJX-5-24				206	0.018734	0.000506	0.282335	7e-06	-10.99
MJX-5-31				209	0.016967	0.000488	0.282176	6e-06	-16.57
MJX-5-33				210	0.013515	0.000388	0.282383	6e-06	-9.21
Qaidam
QR3	Chakaibeishan	pegmatite	Wang et al., 2019 0.16539/j.ddgzyckx.2019.02.016
1				235.9	0.002512	4.2e-05	0.282232	8e-06	–13.9
5				235.9	0.00591	0.00012	0.28226	1.4e-05	–12.9
8				235.9	0.00111	1.9e-05	0.282199	1.2e-05	–15.1
14				235.9	0.002287	3.4e-05	0.28224	7e-06	–13.6
15				235.9	0.007269	0.000137	0.28224	8e-06	–13.7
18				235.9	0.003194	6.6e-05	0.282212	8e-06	–14.6
22				235.9	0.000751	1.5e-05	0.282219	9e-06	–14.4
23				235.9	0.006117	0.000116	0.282221	8e-06	–14.3
24				235.9	0.012078	0.000258	0.282226	7e-06	–14.2
25				235.9	0.008573	0.000192	0.282219	8e-06	–14.4
QR4	Chakaibeishan	pegmatite	Wang et al., 2019 0.16539/j.ddgzyckx.2019.02.016
10				217	0.024971	0.000555	0.282211	8e-06	–15.2
11				217	0.012292	0.000296	0.282225	6e-06	–14.6
12				217	0.002629	6e-05	0.282238	6e-06	–14.1
13				217	0.012086	0.00035	0.282245	1.3e-05	–13.9
14				217	0.005881	0.000148	0.282213	7e-06	–15.0
15				217	0.005607	0.000143	0.282306	1.2e-05	–11.8
16				217	0.003525	8.1e-05	0.282238	6e-06	–14.1
17				217	0.009423	0.000259	0.28222	9e-06	–14.8
18				217	0.012317	0.000322	0.282235	1e-05	–14.3
19				217	0.00613	0.000164	0.282243	8e-06	–14.0
Songpan-Ganze
	Lijiagou	two-mica granite	Fei et al., Lithos,Volumes 364–365, July 2020, 105555
LMH3
1				220.8	0.021787	0.000858	0.281909	2.1e-05	-25.8
2				219.9	0.023078	0.000853	0.282307	2e-05	-11.73
3				222.4	0.029567	0.001264	0.281532	1.5e-05	-39.17
4				220.9	0.016915	0.000676	0.282555	1.6e-05	-2.91
5				234.5	0.013982	0.000449	0.282379	1.4e-05	-8.83
6				227.2	0.039019	0.001541	0.28283	1.6e-05	6.81
7				218.1	0.01278	0.000534	0.282516	1.6e-05	-4.33
8				246.8	0.028654	0.001249	0.282513	2.9e-05	-3.93
9				254.4	0.028078	0.001071	0.282508	2e-05	-3.93
10				232.5	0.006528	0.000218	0.282526	2.1e-05	-3.62
11				241.6	0.033481	0.001276	0.282543	1.3e-05	-3.01
12				226.9	0.029446	0.001083	0.282498	1.2e-05	-4.88
13				215.5	0.006256	0.000214	0.282525	1.8e-05	-4.05
14				220.1	0.02101	0.000768	0.282503	1.5e-05	-4.81
15				254.7	0.019817	0.000843	0.282506	1.6e-05	-3.95
16				121.5	0.042305	0.001843	0.282518	1.4e-05	-6.46
18				214	0.011846	0.000425	0.282517	1.5e-05	-4.38
19				217.9	0.008256	0.000243	0.282444	1.5e-05	-6.84
20				736.4	0.023863	0.00102	0.282214	1.8e-05	-3.98
	Zhawulong	granite	Lithos 378–379 (2020) 105828
zwlg2-4-4-01				212.4	0.029253	0.000814	0.282511	1.9e-05	-4.7
zwlg2-4-4-02				213.6	0.018475	0.000553	0.282459	2.1e-05	-6.4
zwlg2-4-4-03#				578.8	0.008157	0.000267	0.282073	1.6e-05	-12.1
zwlg2-4-4-04				211.1	0.00685	0.000211	0.282484	1.9e-05	-5.6
zwlg2-4-4-05				212.8	0.013759	0.000373	0.282464	1.6e-05	-6.3
zwlg2-4-4-07#				402	0.010006	0.000302	0.282432	2.8e-05	-3.2
zwlg2-4-4-08				207.9	0.020815	0.000615	0.2825	3e-05	-5.1
zwlg2-4-4-09				214.1	0.007689	0.000202	0.282291	2.4e-05	-12.3
zwlg2-4-4-10				205.2	0.010205	0.000343	0.282391	2.3e-05	-9
zwlg2-4-4-11				211.2	0.041367	0.001394	0.282291	2.4e-05	-12.6
zwlg2-4-4-12#				885.6	0.080772	0.002078	0.282149	3.5e-05	-3.7
zwlg2-4-4-13				190.5	0.053375	0.001709	0.282332	3e-05	-11.6
zwlg2-4-4-14#				458.6	0.014038	0.000468	0.282376	2.2e-05	-4.1
zwlg2-4-4-15				215.9	0.044355	0.001425	0.282304	2e-05	-12
zwlg2-4-4-16				215.5	0.034748	0.001213	0.28172	2.3e-05	-32.6
zwlg2-4-4-17#				2694	0.024957	0.000804	0.28097	2.3e-05	-4.7
zwlg2-4-4-18#				658	0.0279	0.000898	0.281935	3.4e-05	-15.5
zwlg2-4-4-19#				570.1	0.018885	0.000631	0.282345	2e-05	-2.8
zwlg2-4-4-20#				405.8	0.006259	0.000155	0.28231	2.6e-05	-7.5
zwlg2-4-4-21				209.6	0.045884	0.001434	0.282566	3e-05	-2.9
zwlg2-4-4-22				210.3	0.049094	0.001705	0.282592	3.5e-05	-2
zwlg2-4-4-23				176.4	0.013101	0.000375	0.282338	2.3e-05	-11.5
zwlg2-4-4-24#				248.1	0.044089	0.001359	0.282469	2.8e-05	-5.5
JJK2017-1-1	Jiajika	two-mica granite	Li et al., 2020 Mineral Deposits, 39(2), 273-304.
1				208.1	0.025824	0.000842	0.282478	2e-05	-5.9
2				366.7	0.044514	0.001372	0.282391	1.4e-05	-5.7
3				207.2	0.023974	0.00078	0.282532	1.5e-05	-4
4				215.7	0.01805	0.000514	0.282463	1.9e-05	-6.3
5				207.3	0.023192	0.000654	0.282536	1.5e-05	-3.9
6				201.6	0.008406	0.000255	0.282497	1.7e-05	-5.3
7				198.1	0.013873	0.000426	0.282505	1.7e-05	-5.1
8					0.022608	0.000494	0.282528	1.5e-05	-4.2
9				172.1	0.00995	0.000251	0.282492	1.6e-05	-6.2
10				207.3	0.010993	0.000315	0.282523	1.6e-05	-4.3
11				209.4	0.006792	0.000219	0.282499	1.5e-05	-5.1
12				214.5	0.00441	0.000117	0.282481	1.8e-05	-5.6
13				203.2	0.00646	0.000198	0.282507	1.8e-05	-4.9
14				199.8	0.005703	0.000165	0.282499	1.5e-05	-5.3
15				202.5	0.024984	0.000751	0.28252	1.8e-05	-4.6
16				206.3	0.008845	0.000342	0.282561	4.7e-05	-3
17				149.4	0.013739	0.000392	0.282469	1.7e-05	-7.5
18				206	0.018029	0.00052	0.282539	1.7e-05	-3.8
19				171.5	0.019062	0.00049	0.282512	1.5e-05	-5.5
20				204.8	0.014216	0.000397	0.282505	1.6e-05	-5
21				352.5	0.039536	0.001215	0.282387	1.5e-05	-6.2
22				209.8	0.020471	0.000582	0.282547	1.8e-05	-3.4
23				206	0.009654	0.000314	0.282507	1.9e-05	-4.9
24				191.2	0.027298	0.000728	0.282483	1.5e-05	-6.1
25				206	0.016849	0.000568	0.282473	2.3e-05	-6.1
26				578.4	0.073629	0.001865	0.282635	2e-05	7.2
27				206	0.024688	0.000716	0.282532	1.7e-05	-4.1
28				227.3	0.061062	0.002189	0.282818	2.1e-05	6.3
29				309.2	0.039631	0.00125	0.282386	2e-05	-7.1
30				206	0.022867	0.000718	0.281655	1.8e-05	-35.1
K2017-8-1	Jiajika	two-mica granite	Li et al., 2020 Mineral Deposits, 39(2), 273-304.
1				200.2	0.017611	0.000508	0.282464	1.7e-05	-6.6
2				200.4	0.017317	0.000495	0.2825	1.8e-05	-5.3
3				213.5	0.006586	0.00019	0.282534	1.9e-05	-3.7
4				227.7	0.012385	0.000437	0.282505	2.1e-05	-4.5
5					0.016428	0.000547	0.282483	1.7e-05	-5.6
6				209.9	0.047781	0.001476	0.282707	2.2e-05	2.1
7				212.8	0.028556	0.000932	0.282443	1.6e-05	-7.1
8					0.027239	0.000741	0.282461	1.5e-05	-6.4
9				212.8	0.018534	0.00058	0.282373	1.8e-05	-9.5
10				215.9	0.016998	0.000511	0.282384	1.8e-05	-9
11				242.2	0.096523	0.002708	0.282639	1.7e-05	0.2
12				765.3	0.023968	0.000744	0.282184	2.1e-05	-4.3
13				225.2	0.061602	0.002722	0.282666	2.1e-05	0.8
14				2098.3	0.017387	0.000709	0.281414	3.6e-05	-2.1
15				924.4	0.015093	0.00051	0.281849	1.8e-05	-12.6
16				460.6	0.014451	0.000607	0.282487	1.6e-05	-0.1
17				236.9	0.017718	0.000612	0.282206	1.6e-05	-14.9
18				248	0.029712	0.001037	0.282689	2.3e-05	2.3
19					0.014123	0.000436	0.282536	2.3e-05	-3.7
20					0.027801	0.000894	0.282711	3.4e-05	2.4
21					0.059397	0.001909	0.282396	2.2e-05	-8.9
22				212.9	0.021004	0.000733	0.282464	1.9e-05	-6.3
23				212.9	0.009032	0.000268	0.282457	2.4e-05	-6.5
24				212.9	0.014645	0.00045	0.281952	3.4e-05	-24.4
25				474.4	0.046919	0.001659	0.282561	2e-05	2.5
26				212.9	0.00543	0.000161	0.282513	1.8e-05	-4.5
28				837.9	0.043599	0.001294	0.28235	1.4e-05	2.9
29					0.03995	0.00146	0.282568	2.1e-05	-2.8
30				248.2	0.036681	0.001226	0.28265	1.8e-05	0.9
JJK2017-12-2	Jiajika	pegmatite	Li et al., 2020 Mineral Deposits, 39(2), 273-304.
1				Inherital zircon	0.00088	2.1e-05	0.282496	1.2e-05	-5.8
2				Inherital zircon	0.000265	6e-06	0.282501	1e-05	-5.6
3				187.9	0.000271	6e-06	0.282487	1.1e-05	-6
4				Inherital zircon	0.0004	9e-06	0.282504	9e-06	-5.5
5				Inherital zircon	0.000493	1.2e-05	0.282465	9e-06	-6.9
6				Inherital zircon	0.000476	1.1e-05	0.282502	1.2e-05	-5.6
7				Inherital zircon	0.000349	8e-06	0.282489	1.2e-05	-6.1
8				Inherital zircon	0.000362	8e-06	0.282491	1.2e-05	-6
9				Inherital zircon	0.000537	1.2e-05	0.282504	1.1e-05	-5.5
10				Inherital zircon	0.000143	3e-06	0.2825	1.2e-05	-5.7
11				191.3	0.000486	1.1e-05	0.282494	1.1e-05	-5.6
12				Inherital zircon	0.0008	2.1e-05	0.282494	1.3e-05	-5.9
13				Inherital zircon	0.000295	7e-06	0.2825	6e-06	-5.7
14				Inherital zircon	0.000329	8e-06	0.282498	1.1e-05	-5.7
15				Inherital zircon	0.000395	9e-06	0.282495	1.1e-05	-5.8
16				180.9	0.00122	2.8e-05	0.282506	9e-06	-5.4
17				Inherital zircon	0.000704	1.6e-05	0.282499	1.2e-05	-5.7
18				Inherital zircon	0.000837	2e-05	0.282504	1e-05	-5.5
19				Inherital zircon	0.000706	1.6e-05	0.282488	1.2e-05	-6.1
20				Inherital zircon	0.000661	1.5e-05	0.282497	1e-05	-5.8
22				Inherital zircon	0.001384	3.2e-05	0.282502	1.2e-05	-5.6
23				Inherital zircon	0.001098	2.5e-05	0.28249	1.1e-05	-6
24				Inherital zircon	0.000851	2e-05	0.282496	7e-06	-5.8
25				Inherital zircon	0.000651	1.7e-05	0.282495	1e-05	-5.8
26				Inherital zircon	0.000777	1.9e-05	0.282495	1.2e-05	-5.8
27				180	0.001071	2.5e-05	0.282492	1.2e-05	-6
28				180	0.000296	7e-06	0.282495	1.1e-05	-5.8
29				180	0.000249	6e-06	0.282488	1.2e-05	-6.1
30				180	0.000327	8e-06	0.282495	1.4e-05	-5.8
JJK2017-8-3	Jiajika	pegmatite	Li et al., 2020 Mineral Deposits, 39(2), 273-304.
27				180	0.000542	1.5e-05	0.282493	1.1e-05	-5.9
28				180	0.00136	3.5e-05	0.282488	9e-06	-6.1
29				180	0.003988	0.000103	0.282494	1.1e-05	-5.9
30				180	0.007026	0.000171	0.282492	1e-05	-6
LM107	Lijiagou	muscovite albite granite	Fei et al., Lithos,Volumes 364–365, July 2020, 105555
4				216.5	0.016054	0.000551	0.282392	1e-05	-8.75
5				339.4	0.026423	0.001023	0.282035	1.3e-05	-18.85
6				216.7	0.052111	0.001933	0.282565	1.8e-05	-2.83
8				219	0.008531	0.000304	0.282392	1e-05	-8.67
9				216.7	0.035368	0.001257	0.282397	1.3e-05	-8.68
10				216.3	0.055561	0.001986	0.282538	1.8e-05	-3.81
12				219,7	0.017324	0.000602	0.282411	1.1e-05	-8.02
13				215.3	0.075146	0.002533	0.282436	1.3e-05	-7.51
14				213.8	0.008189	0.00029	0.282405	1e-05	-8.33
16				216.8	0.016903	0.000622	0.282292	1.6e-05	-12.3
18				218.1	0.01783	0.000612	0.28239	1.1e-05	-8.8
19				218.7	0.012226	0.000403	0.282399	1e-05	-8.43
20				215.7	0.065434	0.002241	0.282152	2e-05	-17.52
21				215.6	0.078163	0.002662	0.282405	1.5e-05	-8.63
22				215.2	0.007223	0.000172	0.282384	1e-05	-9.01
23				339	0.036346	0.001283	0.282231	1.6e-05	-11.98
24				334.5	0.014934	0.00053	0.281925	1.9e-05	-22.73
LKH3	Lijiagou	albite pegmatite	Fei et al., Lithos,Volumes 364–365, July 2020, 105555
1				224.9	0.04665	0.001798	0.282511	1.2e-05	-4.56
4				201.2	0.026668	0.00109	0.282622	1.4e-05	-1.02
5				193.1	0.061528	0.002471	0.282632	1.5e-05	-1.01
7				195.5	0.014566	0.000418	0.282466	1e-05	-6.6
8				193.4	0.075116	0.00291	0.282677	1.7e-05	0.53
9				890.5	0.031068	0.001336	0.282467	1.7e-05	8.14
10				204.8	0.007694	0.000324	0.282449	1e-05	-6.98
11				209.3	0.012945	0.000429	0.282462	7e-06	-6.42
13				231.9	0.022411	0.000871	0.282615	1.2e-05	-0.58
14				205.8	0.029644	0.000953	0.282457	1.2e-05	-6.75
15				207.2	0.040846	0.001358	0.282457	1e-05	-6.78
16				222.9	0.029597	0.001311	0.282387	3.6e-05	-8.92
17				1328	0.050073	0.001819	0.282064	5.1e-05	2.86
18				206.6	0.0793	0.003091	0.282644	1.5e-05	-0.42
19				201.2	0.023998	0.000952	0.282335	1.4e-05	-11.17
20				203.2	0.015774	0.000533	0.282483	9e-06	-5.83
LPD4H2	Lijiagou	albite spodumene pegmatit	Fei et al., Lithos,Volumes 364–365, July 2020, 105555
1				200.6	0.002678	7.7e-05	0.282522	7e-06	-4.44
2				216.6	0.010449	0.000287	0.282521	7e-06	-4.16
3				200.3	0.000265	1.1e-05	0.282529	5e-06	-4.18
4				193.9	0.001671	4.9e-05	0.282517	6e-06	-4.77
5				221.9	0.000375	1.4e-05	0.282514	6e-06	-4.24
6				193.1	0.002299	7.3e-05	0.282513	6e-06	-4.92
7				198.1	0.002377	6.8e-05	0.28253	8e-06	-4.2
8				200.1	0.002178	7.1e-05	0.282527	9e-06	-4.27
9				201.3	0.007983	0.000241	0.282525	1.1e-05	-4.34
10				194.3	0.000572	2.3e-05	0.282539	7e-06	-3.99
11				271.6	0.004099	0.000119	0.282536	9e-06	-2.4
12				241.3	0.002426	6.6e-05	0.282538	1e-05	-2.97

[truncated: 1 more sheets: Table S9 WR elements]
